# Supplementary material for: Palladium-catalyzed ortho-acylation of 2-aryl pyridine derivatives using arylmethyl amines as new acyl sources
Source: Royal Society of Chemistry journal article supplement (doi:10.1039/c3cc42106f), 2013-01-01

# **Palladium-catalyzed *ortho*-acylation of 2-aryl pyridine derivatives using benzylamines as new acyl sources**

Qian Zhang, Fan Yang\*, Yangjie Wu\*

*The College of Chemistry and Molecular Engineering, Henan Key Laboratory of Chemical Biology and Organic Chemistry, Key Laboratory of Applied Chemistry of Henan Universities, Zhengzhou University, Zhengzhou 450052, People's Republic of China*

Tel/Fax: (+86)-371-6797-9408. E-mail: yangf@zzu.edu.cn; wyj@zzu.edu.cn

## **Contents**

|                                                                                                                          |           |
|--------------------------------------------------------------------------------------------------------------------------|-----------|
| <b>Optimization process data in detail</b>                                                                               | <b>S2</b> |
| <b>Experimental section</b>                                                                                              | <b>S3</b> |
| <b>General details</b>                                                                                                   | <b>S3</b> |
| <b>General procedure for the palladium-catalyzed acylation of 2-arylpyridines</b>                                        | <b>S4</b> |
| <b>Copies of <math>^1\text{H}</math> and <math>^{13}\text{C}</math> NMR spectra for all the acylated 2-arylpyridines</b> | <b>S9</b> |

### Optimization process data in detail

Table 1. Optimization of the Reaction Conditions<sup>a</sup>

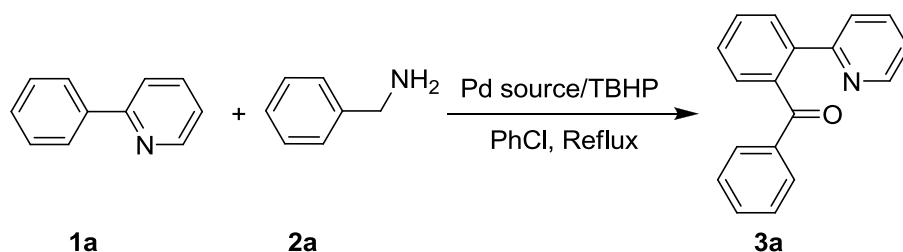

| Entry | Palladium source      | <b>1a:2a</b> | T (°C) | t (h) | Additive (mol%)                     | Oxidant (equiv)                     | Solvent              | Yield (%) <sup>b</sup> |
|-------|-----------------------|--------------|--------|-------|-------------------------------------|-------------------------------------|----------------------|------------------------|
| 1     | PdCl <sub>2</sub> (5) | 1:2          | reflux | 8     | -                                   | O <sub>2</sub>                      | chlorobenzene        | <5                     |
| 2     | PdCl <sub>2</sub> (5) | 1:2          | reflux | 8     | -                                   | H <sub>2</sub> O <sub>2</sub> (3.5) | chlorobenzene        | <5                     |
| 3     | PdCl <sub>2</sub> (5) | 1:2          | reflux | 8     | -                                   | DDQ (3.5)                           | chlorobenzene        | <5                     |
| 4     | PdCl <sub>2</sub> (5) | 1:2          | reflux | 8     | -                                   | Ag <sub>2</sub> O (3.5)             | chlorobenzene        | <5                     |
| 5     | PdCl <sub>2</sub> (5) | 1:2          | reflux | 8     | -                                   | Cu(OAc) <sub>2</sub> (3.5)          | chlorobenzene        | <5                     |
| 6     | PdCl <sub>2</sub> (5) | 1:2          | reflux | 8     | -                                   | TBHP (3.5)                          | chlorobenzene        | 47                     |
| 7     | PdCl <sub>2</sub> (5) | 1:2          | 140    | 8     | -                                   | TBHP (3.5)                          | xylene               | 21                     |
| 8     | PdCl <sub>2</sub> (5) | 1:2          | 140    | 8     | -                                   | TBHP (3.5)                          | N,N-dimethyl aniline | <5                     |
| 9     | PdCl <sub>2</sub> (5) | 1:2          | 140    | 8     | -                                   | TBHP (3.5)                          | DMSO                 | <5                     |
| 10    | PdCl <sub>2</sub> (5) | 1:2          | 140    | 8     | -                                   | TBHP (3.5)                          | DMF                  | <5                     |
| 11    | PdCl <sub>2</sub> (5) | 1:2          | 140    | 8     | -                                   | TBHP (3.5)                          | DME                  | <5                     |
| 12    | PdCl <sub>2</sub> (5) | 1:2          | 140    | 8     | -                                   | TBHP (3.5)                          | NMP                  | 17                     |
| 13    | PdCl <sub>2</sub> (5) | 1:2          | 140    | 8     | -                                   | TBHP (3.5)                          | nitrobenzene         | <5                     |
| 14    | PdCl <sub>2</sub> (5) | 1:2          | 140    | 8     | -                                   | TBHP (3.5)                          | --                   | 40                     |
| 15    | PdCl <sub>2</sub> (5) | 1:2          | reflux | 8     | -                                   | TBHP (3.5)                          | bromobenzene         | 37                     |
| 16    | PdCl <sub>2</sub> (5) | 1:2          | reflux | 8     | -                                   | TBHP (3.5)                          | 1,4-dioxane          | <5                     |
| 17    | PdCl <sub>2</sub> (5) | 1:2          | reflux | 8     | TsOH (1equiv)                       | TBHP (3.5)                          | toluene              | 7                      |
| 18    | PdCl <sub>2</sub> (5) | 1:2          | reflux | 8     | HOAc (1 equiv)                      | TBHP (3.5)                          | toluene              | <5                     |
| 19    | PdCl <sub>2</sub> (5) | 1:2          | reflux | 8     | -                                   | TBHP (3.5)                          | toluene              | 16                     |
| 20    | PdCl <sub>2</sub> (5) | 1:2          | reflux | 8     | PPh <sub>3</sub> (10)               | TBHP (3.5)                          | chlorobenzene        | 40                     |
| 21    | PdCl <sub>2</sub> (5) | 1:2          | reflux | 8     | Dppf (5)                            | TBHP (3.5)                          | chlorobenzene        | 35                     |
| 22    | PdCl <sub>2</sub> (5) | 1:2          | reflux | 8     | 1,10-Phenanthroline monohydrate (5) | TBHP (3.5)                          | chlorobenzene        | 21                     |
| 23    | PdCl <sub>2</sub> (5) | 1:2          | reflux | 8     | DMEDA (5)                           | TBHP (3.5)                          | chlorobenzene        | 20                     |
| 24    | PdCl <sub>2</sub> (5) | 1:2          | reflux | 8     | AgOAc (10)                          | TBHP (3.5)                          | chlorobenzene        | 20                     |

|                 |                                                               |              |               |          |                        |                   |                      |                |
|-----------------|---------------------------------------------------------------|--------------|---------------|----------|------------------------|-------------------|----------------------|----------------|
| 25              | PdCl <sub>2</sub> (5)                                         | 1:2          | reflux        | 8        | CuBr (10)              | TBHP (3.5)        | chlorobenzene        | 15             |
| 26              | PdCl <sub>2</sub> (5)                                         | 1:2          | reflux        | 8        | FeCl <sub>3</sub> (10) | TBHP (3.5)        | chlorobenzene        | 16             |
| 27              | PdCl <sub>2</sub> (5)                                         | 1:2          | reflux        | 8        | AlCl <sub>3</sub> (10) | TBHP (3.5)        | chlorobenzene        | <5             |
| 28              | PdCl <sub>2</sub> (5)                                         | 1:2          | reflux        | 8        | HOAc (10)              | TBHP (3.5)        | chlorobenzene        | <5             |
| 29              | PdCl <sub>2</sub> (10)                                        | 1:2          | reflux        | 8        | -                      | TBHP (3.5)        | chlorobenzene        | 50             |
| 30              | PdCl <sub>2</sub> (10)                                        | 1:2          | reflux        | 4        | -                      | TBHP (3.5)        | chlorobenzene        | 38             |
| 31              | PdCl <sub>2</sub> (10)                                        | 1:2          | reflux        | 6        | -                      | TBHP (3.5)        | chlorobenzene        | 47             |
| 32              | PdCl <sub>2</sub> (10)                                        | 1:2          | reflux        | 10       | -                      | TBHP (3.5)        | chlorobenzene        | 52             |
| 33              | PdCl <sub>2</sub> (10)                                        | 1:2          | reflux        | 8        | -                      | TBHP (1)          | chlorobenzene        | <5             |
| 34              | PdCl <sub>2</sub> (10)                                        | 1:2          | reflux        | 8        | -                      | TBHP (2.5)        | chlorobenzene        | 24             |
| 35              | PdCl <sub>2</sub> (10)                                        | 1:2          | reflux        | 8        | -                      | TBHP (3.5)        | chlorobenzene        | 56             |
| 36              | PdCl <sub>2</sub> (10)                                        | 1:2          | reflux        | 8        | -                      | TBHP (5)          | chlorobenzene        | 58             |
| 37              | PdCl <sub>2</sub> (10)                                        | 1:2          | reflux        | 8        | -                      | TBHP (7)          | chlorobenzene        | 31             |
| 38              | PdCl <sub>2</sub> (10)                                        | 1:1.1        | reflux        | 8        | -                      | TBHP (3.5)        | chlorobenzene        | 46             |
| 39              | PdCl <sub>2</sub> (10)                                        | 1:1.2        | reflux        | 8        | -                      | TBHP (3.5)        | chlorobenzene        | 56 (46)        |
| 40              | PdCl <sub>2</sub> (10)                                        | 1:1.4        | reflux        | 8        | -                      | TBHP (3.5)        | chlorobenzene        | 69 (57)        |
| 41              | PdCl <sub>2</sub> (10)                                        | 1:1.6        | reflux        | 8        | -                      | TBHP (3.5)        | chlorobenzene        | 54             |
| 42              | PdCl <sub>2</sub> (10)                                        | 1:2          | reflux        | 8        | -                      | TBHP (3.5)        | chlorobenzene        | 50             |
| 43              | PdCl <sub>2</sub> (10)                                        | 1:3          | reflux        | 8        | -                      | TBHP (3.5)        | chlorobenzene        | 37             |
| 44 <sup>c</sup> | PdCl <sub>2</sub> (10)                                        | 1:1.4        | reflux        | 8        | -                      | TBHP (3.5)        | chlorobenzene        | 76             |
| 45 <sup>d</sup> | <b>PdCl<sub>2</sub>(10)</b>                                   | <b>1:1.4</b> | <b>reflux</b> | <b>8</b> | <b>-</b>               | <b>TBHP (3.5)</b> | <b>chlorobenzene</b> | <b>81 (68)</b> |
| 46 <sup>e</sup> | PdCl <sub>2</sub> (10)                                        | 1:1.4        | reflux        | 8        | -                      | TBHP (3.5)        | chlorobenzene        | 35             |
| 47 <sup>d</sup> | Pd(OAc) <sub>2</sub><br>(10)                                  | 1:1.4        | reflux        | 8        | -                      | TBHP (3.5)        | chlorobenzene        | 47             |
| 48 <sup>d</sup> | Pd <sub>2</sub> (dba) <sub>3</sub><br>(5)                     | 1:1.4        | reflux        | 8        | -                      | TBHP (3.5)        | chlorobenzene        | 55             |
| 49 <sup>d</sup> | Pd(PPh <sub>3</sub> ) <sub>2</sub><br>Cl <sub>2</sub><br>(10) | 1:1.4        | reflux        | 8        | -                      | TBHP (3.5)        | chlorobenzene        | 40             |

<sup>a</sup> Reaction conditions: **1a** (0.2 mmol), benzylamine, palladium catalyst, TBHP in 2 mL solvent at refluxing temperature for 8 h. <sup>b</sup> GC yield. <sup>c</sup> 1 mL solvent. <sup>d</sup> Under nitrogen atmosphere and 1 mL solvent. <sup>e</sup> At 110 °C, under nitrogen atmosphere and 1 mL solvent.

## Experimental Section

### General details

<sup>1</sup>H NMR, <sup>13</sup>C NMR spectra were recorded on a Bruker DPX-400 spectrometer with CDCl<sub>3</sub> as the solvent and TMS as an internal standard. Melting points were measured by using a WC-1 microscopic apparatus. GC analysis was performed on Agilent 4890D gas chromatograph. Mass spectra were measured on an LC-MSD-Trap-XCT instrument. High resolution mass spectra were

measured on a UHPLC Q-TOF HR-MS. The single crystal X-ray diffraction study was measured on a Xcalibur, Eos, Gemini diffractometer. Dichloromethane, ethyl acetate and hexane were used for column chromatography without further purification, and other solvents were purified according to the standard methods. The chemicals were obtained from commercial sources and used as-received unless otherwise noted.

#### General procedure for the palladium-catalyzed acylation of 2-arylpyridines

To a solution of 2-arylpyridines (0.2 mmol) in chlorobenzene (1 mL), arylmethyl amines (0.28 mmol), PdCl<sub>2</sub> (10 mol%) and TBHP (0.7 mmol) were added. The resulting mixture was heated at refluxing temperature for 8 h. After the reaction was complete, the mixture was added into H<sub>2</sub>O (25 mL) and extracted with ethyl acetate (10 mL) for three times. The combined organic layer was dried over anhydrous Na<sub>2</sub>SO<sub>4</sub> and filtered. After removal of the solvent *in vacuo*, the residue was purified by column chromatography (ethyl acetate/hexane) to afford the pure product.

#### 2-[(2-benzoyl)phenyl]pyridine (**3a**)<sup>1</sup>

Light yellow solid, mp 101–103 °C; <sup>1</sup>H NMR (400 MHz, CDCl<sub>3</sub>): δ 7.01 (t, *J* = 5.8 Hz, 1H), 7.28–7.30 (m, 2H), 7.36–7.42 (m, 1H), 7.49–7.63 (m, 5H), 7.71 (d, *J* = 7.52 Hz, 2H), 7.79 (d, *J* = 7.64 Hz, 1H), 8.37 (d, *J* = 4.08 Hz, 1H); <sup>13</sup>C NMR (100 MHz, CDCl<sub>3</sub>): δ 121.9, 122.7, 128.0, 128.5, 128.8, 129.1, 129.5, 130.2, 132.3, 136.3, 137.9, 139.5, 139.7, 149.0, 156.8, 198.2; HRMS-ESI (*m/z*): calcd for C<sub>18</sub>H<sub>14</sub>NO (*M*+H<sup>+</sup>): 260.1070, found 260.1076.

#### 2-[[2-benzoyl-4-(*tert*-butyl)]phenyl]pyridine (**3b**)

Light yellow solid, mp 74–76 °C; <sup>1</sup>H NMR (400 MHz, CDCl<sub>3</sub>): δ 1.37 (s, 9H), 6.96 (t, *J* = 5.86 Hz, 1H), 7.22–7.27 (m, 2H), 7.36 (t, *J* = 7.2 Hz, 1H), 7.46 (d, *J* = 7.76 Hz, 1H), 7.49–7.56 (m, 2H), 7.62 (d, *J* = 8.16 Hz, 1H), 7.67–7.72 (m, 3H), 8.33 (d, *J* = 4.16 Hz, 1H); <sup>13</sup>C NMR (100 MHz, CDCl<sub>3</sub>): δ 31.2, 34.9, 121.7, 122.5, 126.1, 127.3, 128.0, 128.4, 129.5, 132.2, 136.2, 136.8, 138.0, 139.1, 149.0, 151.9, 156.7, 198.7; HRMS-ESI (*m/z*): calcd for C<sub>22</sub>H<sub>22</sub>NO (*M*+H<sup>+</sup>): 316.1696, found 316.1700.

#### 2-[[2-benzoyl-4-(*tert*-butyl)]phenyl]-3-methylpyridine (**3c**)

Light yellow solid, mp 73–75 °C; <sup>1</sup>H NMR (400 MHz, CDCl<sub>3</sub>): δ 1.37 (s, 9H), 2.23 (s, 3H), 6.94 (dd, *J* = 7.50 Hz, 4.80 Hz, 1H), 7.24–7.30 (m, 2H), 7.32–7.42 (m, 3H), 7.59–7.67 (m, 4H), 8.24 (d, *J* = 4.28 Hz, 1H); <sup>13</sup>C NMR (100 MHz, CDCl<sub>3</sub>): δ 31.3, 34.8, 44.0, 122.0, 126.6, 127.5, 127.8, 128.5, 129.6, 129.7, 131.5, 132.3, 137.7, 137.9, 138.8, 146.4, 150.8, 157.7, 198.2; HRMS-ESI (*m/z*): calcd for C<sub>23</sub>H<sub>24</sub>NO (*M*+H<sup>+</sup>): 330.1852, found 330.1857.

#### 2-[(2-benzoyl-4-methyl)phenyl]pyridine (**3d**)<sup>1</sup>

Light yellow solid, mp 131–133 °C; <sup>1</sup>H NMR (400 MHz, CDCl<sub>3</sub>): δ 2.45 (s, 3H), 6.97 (dd, *J* = 6.64 Hz, 5.04 Hz, 1H), 7.22–7.28 (m, 2H), 7.34–7.42 (m, 3H), 7.46 (d, *J* = 7.84 Hz, 1H), 7.50–7.56 (m, 1H), 7.65–7.70 (m, 3H), 8.33 (d, *J* = 4.28 Hz, 1H); <sup>13</sup>C NMR (100 MHz, CDCl<sub>3</sub>): δ 21.2, 121.7, 122.4, 128.0, 128.6, 129.4, 129.6, 130.9, 132.2, 136.2, 136.8, 138.0, 138.7, 139.4, 149.0, 156.7, 198.5; HRMS-ESI (*m/z*): calcd for C<sub>19</sub>H<sub>16</sub>NO (*M*+H<sup>+</sup>): 274.1226, found 274.1231.

#### 2-[(2-benzoyl-5-methyl)phenyl]-4-methylpyridine (**3e**)

Light yellow solid, mp 134–136 °C; <sup>1</sup>H NMR (400 MHz, CDCl<sub>3</sub>): δ 2.24 (s, 3H), 2.49 (s, 3H),

6.80 (d,  $J = 4.96$  Hz, 1H), 7.21-7.27 (m, 3H), 7.29-7.36 (m, 2H), 7.46 (d,  $J = 7.72$  Hz, 1H), 7.56 (s, 1H), 7.63-7.67 (m, 2H), 8.22 (d,  $J = 5.0$  Hz, 1H);  $^{13}\text{C}$  NMR (100 MHz,  $\text{CDCl}_3$ ):  $\delta$  21.0, 21.5, 122.9, 124.1, 128.0, 129.0, 129.4, 129.5, 129.6, 132.2, 136.6, 138.2, 140.1, 140.6, 147.2, 148.9, 156.9, 198.4; HRMS-ESI ( $m/z$ ): calcd for  $\text{C}_{20}\text{H}_{18}\text{NO}$  ( $\text{M}+\text{H}^+$ ): 288.1383, found 288.1389.

2-[(2-benzoyl-5-methyl)phenyl]-5-methylpyridine (**3f**)

White solid, mp 150–152 °C;  $^1\text{H}$  NMR (400 MHz,  $\text{CDCl}_3$ ):  $\delta$  2.20 (s, 3H), 2.48 (s, 3H), 7.23-7.34 (m, 5H), 7.35-7.44 (m, 2H), 7.56 (s, 1H), 7.68 (d,  $J = 7.68$  Hz, 2H), 8.21 (s, 1H);  $^{13}\text{C}$  NMR (100 MHz,  $\text{CDCl}_3$ ):  $\delta$  18.1, 21.5, 122.4, 128.0, 128.8, 129.2, 129.5, 129.6, 131.4, 132.2, 136.5, 136.7, 138.1, 139.9, 140.5, 149.5, 154.3, 198.4; HRMS-ESI ( $m/z$ ): calcd for  $\text{C}_{20}\text{H}_{18}\text{NO}$  ( $\text{M}+\text{H}^+$ ): 288.1383, found 288.1387.

2-[(2-benzoyl-5-methyl)phenyl]-3-methylpyridine (**3g**)

Yellow liquid;  $^1\text{H}$  NMR (400 MHz,  $\text{CDCl}_3$ ):  $\delta$  2.18 (s, 3H), 2.46 (s, 3H), 6.98 (t,  $J = 6.0$  Hz, 1H), 7.27-7.31 (m, 4H), 7.34-7.41 (m, 2H), 7.52 (d,  $J = 7.56$  Hz, 1H), 7.65 (d,  $J = 7.44$  Hz, 2H), 8.29 (d,  $J = 3.76$  Hz, 1H);  $^{13}\text{C}$  NMR (100 MHz,  $\text{CDCl}_3$ ):  $\delta$  19.5, 21.5, 122.1, 127.9, 128.3, 129.8, 130.0, 130.7, 131.5, 132.3, 136.0, 137.6, 137.9, 141.0, 141.2, 146.4, 158.1, 197.5; HRMS-ESI ( $m/z$ ): calcd for  $\text{C}_{20}\text{H}_{18}\text{NO}$  ( $\text{M}+\text{H}^+$ ): 288.1383, found 288.1390.

2-[(2-benzoyl-4-methoxy)phenyl]pyridine (**3h**)<sup>1</sup>

Light yellow solid, mp 113–115 °C;  $^1\text{H}$  NMR (400 MHz,  $\text{CDCl}_3$ ):  $\delta$  3.87 (s, 3H), 6.94 (t,  $J = 6.0$  Hz, 1H), 7.05 (d,  $J = 1.84$  Hz, 1H), 7.09-7.14 (m, 1H), 7.22-7.28 (m, 2H), 7.34-7.39 (m, 1H), 7.42-7.54 (m, 2H), 7.67-7.74 (m, 3H), 8.29 (d,  $J = 4.24$  Hz, 1H);  $^{13}\text{C}$  NMR (100 MHz,  $\text{CDCl}_3$ ):  $\delta$  55.6, 114.0, 116.1, 121.4, 122.0, 128.0, 129.4, 129.9, 132.0, 132.3, 136.2, 137.8, 140.8, 148.8, 156.3, 159.9, 197.9; HRMS-ESI ( $m/z$ ): calcd for  $\text{C}_{19}\text{H}_{16}\text{NO}_2$  ( $\text{M}+\text{H}^+$ ): 290.1176, found 290.1180.

2-[(2-benzoyl-6-methoxy)phenyl]pyridine (**3i**)

Light yellow liquid;  $^1\text{H}$  NMR (400 MHz,  $\text{CDCl}_3$ ):  $\delta$  3.85 (s, 3H), 6.94-6.99 (m, 1H), 7.11-7.16 (m, 2H), 7.22-7.28 (m, 2H), 7.35-7.40 (m, 1H), 7.46 (t,  $J = 7.96$  Hz, 1H), 7.50-7.58 (m, 2H), 7.64-7.68 (m, 2H), 8.34 (d,  $J = 4.72$  Hz, 1H);  $^{13}\text{C}$  NMR (100 MHz,  $\text{CDCl}_3$ ):  $\delta$  56.0, 113.0, 121.2, 121.7, 126.0, 127.9, 128.7, 129.4, 129.6, 132.3, 135.4, 137.8, 141.9, 148.7, 154.3, 156.7, 197.2; HRMS-ESI ( $m/z$ ): calcd for  $\text{C}_{19}\text{H}_{16}\text{NO}_2$  ( $\text{M}+\text{H}^+$ ): 290.1176, found 290.1181.

2-[(2-benzoyl-5-methoxy)phenyl]pyridine (**3j**)

Light yellow solid, mp 101–104 °C;  $^1\text{H}$  NMR (400 MHz,  $\text{CDCl}_3$ ):  $\delta$  3.92 (s, 3H), 6.98-7.05 (m, 2H), 7.21-7.26 (m, 3H), 7.32-7.41 (m, 2H), 7.49-7.57 (m, 2H), 7.65 (d,  $J = 7.52$  Hz, 2H), 8.40 (d,  $J = 4.16$  Hz, 1H);  $^{13}\text{C}$  NMR (100 MHz,  $\text{CDCl}_3$ ):  $\delta$  55.6, 113.8, 114.6, 122.0, 123.3, 128.0, 130.0, 131.5, 131.8, 132.1, 136.2, 138.3, 142.3, 149.1, 157.1, 161.2, 197.5; HRMS-ESI ( $m/z$ ): calcd for  $\text{C}_{19}\text{H}_{16}\text{NO}_2$  ( $\text{M}+\text{H}^+$ ): 290.1176, found 290.1180.

2-[(2-benzoyl-5-methoxy)phenyl]-3-methylpyridine (**3k**)

Light yellow solid, mp 89–91 °C;  $^1\text{H}$  NMR (400 MHz,  $\text{CDCl}_3$ ):  $\delta$  2.18 (s, 3H), 3.89 (s, 3H), 6.97-7.03 (m, 3H), 7.29 (t,  $J = 7.14$  Hz, 2H), 7.36-7.43 (m, 2H), 7.59-7.67 (m, 3H), 8.32 (d,  $J = 4.2$  Hz, 1H);  $^{13}\text{C}$  NMR (100 MHz,  $\text{CDCl}_3$ ):  $\delta$  19.4, 55.6, 113.0, 115.5, 127.9, 129.3, 129.8, 131.1,

131.4, 132.1, 132.4, 137.6, 138.2, 143.3, 146.4, 158.0, 161.5, 196.8; HRMS-ESI ( $m/z$ ): calcd for  $C_{20}H_{18}NO$  ( $M+H^+$ ): 304.1332, found 304.1338.

2-(2-benzoylphenyl)-3-methylpyridine (**3l**)

Yellow solid, mp 93–96 °C;  $^1H$  NMR (400 MHz,  $CDCl_3$ ):  $\delta$  2.21 (s, 3H), 6.97 (dd,  $J = 7.04$  Hz, 5.0 Hz, 1H), 7.25–7.31 (m, 2H), 7.35–7.41 (m, 2H), 7.45–7.51 (m, 2H), 7.56–7.63 (m, 2H), 7.66 (d,  $J = 7.52$  Hz, 2H), 8.26 (d,  $J = 3.96$  Hz, 1H);  $^{13}C$  NMR (100 MHz,  $CDCl_3$ ):  $\delta$  19.5, 122.2, 127.7, 127.9, 129.5, 129.7, 129.9, 130.4, 131.5, 132.5, 137.7, 137.8, 139.1, 140.7, 146.4, 157.7, 197.7; HRMS-ESI ( $m/z$ ): calcd for  $C_{19}H_{16}NO$  ( $M+H^+$ ): 274.1226, found 274.1230.

2-[(2-benzoyl-4-bromo)phenyl]pyridine (**3m**)<sup>1</sup>

Yellow solid, mp 106–108 °C;  $^1H$  NMR (400 MHz,  $CDCl_3$ ):  $\delta$  7.02 (dd,  $J = 6.72$  Hz, 5.16 Hz, 1H), 7.28 (t,  $J = 7.36$  Hz, 2H), 7.40 (t,  $J = 7.36$  Hz, 1H), 7.48 (d,  $J = 7.88$  Hz, 1H), 7.57 (td,  $J = 7.74$  Hz, 1.6 Hz, 1H), 7.63–7.75 (m, 5H), 8.33 (d,  $J = 4.52$  Hz, 1H);  $^{13}C$  NMR (100 MHz,  $CDCl_3$ ):  $\delta$  122.3, 122.4, 122.9, 128.2, 129.4, 130.2, 131.8, 132.7, 133.1, 136.5, 137.3, 138.4, 141.2, 149.1, 155.6, 196.5; HRMS-ESI ( $m/z$ ): calcd for  $C_{18}H_{13}BrNO$  ( $M+H^+$ ): 338.0181, found 338.0180.

2-[(2-benzoyl-4-bromo)phenyl]-3-methylpyridine (**3n**)

Light yellow solid, mp 57–59 °C;  $^1H$  NMR (400 MHz,  $CDCl_3$ ):  $\delta$  2.21 (s, 3H), 6.97 (s, 1H), 7.26–7.37 (m, 5H), 7.63 (d,  $J = 6.72$  Hz, 2H), 7.69–7.75 (m, 2H), 8.24 (s, 1H);  $^{13}C$  NMR (100 MHz,  $CDCl_3$ ):  $\delta$  19.5, 122.5, 127.0, 128.1, 129.6, 131.5, 131.6, 132.2, 132.8, 133.2, 137.1, 138.0, 139.4, 141.1, 146.5, 156.4, 195.9; HRMS-ESI ( $m/z$ ): calcd for  $C_{19}H_{15}BrNO$  ( $M+H^+$ ): 352.0337, found 352.0335.

2-[(2-benzoyl-5-ethoxycarbonyl)phenyl]pyridine (**3o**)

White solid, mp 111–113 °C;  $^1H$  NMR (400 MHz,  $CDCl_3$ ):  $\delta$  1.44 (t,  $J = 7.12$  Hz, 3H), 4.45 (dd,  $J = 14.24$  Hz, 7.12 Hz, 2H), 7.05 (dd,  $J = 8.78$  Hz, 4.40 Hz, 1H), 7.28 (t,  $J = 6.96$  Hz, 2H), 7.41 (t,  $J = 7.36$  Hz, 1H), 7.57–7.70 (m, 5H), 8.19 (dd,  $J = 7.90$  Hz, 1.16 Hz, 1H), 8.35 (d,  $J = 4.72$  Hz, 1H), 8.47 (s, 1H);  $^{13}C$  NMR (100 MHz,  $CDCl_3$ ):  $\delta$  14.4, 61.5, 122.4, 122.5, 128.2, 129.1, 129.3, 129.5, 129.7, 132.0, 132.6, 136.6, 137.4, 139.6, 143.5, 149.9, 155.7, 165.8, 197.4; HRMS-ESI ( $m/z$ ): calcd for  $C_{21}H_{18}NO_3$  ( $M+H^+$ ): 332.1281, found 332.1286.

2-[(2-benzoyl-5-ethoxycarbonyl)phenyl]-5-methylpyridine (**3p**)

Light yellow solid, mp 95–97 °C;  $^1H$  NMR (400 MHz,  $CDCl_3$ ):  $\delta$  1.44 (t,  $J = 7.1$  Hz, 3H), 2.21 (s, 3H), 4.45 (dd,  $J = 14.18$  Hz, 7.04 Hz, 2H), 7.29 (t,  $J = 8.20$  Hz, 2H), 7.39–7.45 (m, 2H), 7.54 (t,  $J = 8.24$  Hz, 2H), 7.69 (d,  $J = 7.56$  Hz, 2H), 8.14–8.18 (m, 2H), 8.45 (s, 1H);  $^{13}C$  NMR (100 MHz,  $CDCl_3$ ):  $\delta$  14.4, 18.1, 61.4, 121.8, 128.2, 128.9, 129.2, 129.3, 129.5, 131.9, 132.0, 132.6, 137.1, 137.5, 139.6, 143.4, 149.4, 152.8, 165.9, 197.5; HRMS-ESI ( $m/z$ ): calcd for  $C_{22}H_{20}NO_3$  ( $M+H^+$ ): 346.1438, found 346.1442.

2-[(2-benzoyl-4-fluoro)phenyl]pyridine (**3q**)

Light yellow solid, mp 150–152 °C;  $^1H$  NMR (400 MHz,  $CDCl_3$ ):  $\delta$  7.02 (dd,  $J = 7.02$  Hz, 1H), 7.22–7.33 (m, 4H), 7.37–7.49 (m, 2H), 7.55–7.69 (m, 3H), 7.77 (dd,  $J = 8.52$  Hz, 1H), 8.35 (d,  $J = 4.52$  Hz, 1H);  $^{13}C$  NMR (100 MHz,  $CDCl_3$ ):  $\delta$  116.2 (d,  $J = 22.9$  Hz), 117.1 (d,  $J = 21.4$  Hz),

122.0, 122.4, 128.2, 129.4, 130.7 (d,  $J = 8.0$  Hz), 132.7, 135.7 (d,  $J = 2.8$  Hz), 136.5, 137.3, 141.5 (d,  $J = 6.1$  Hz), 149.0, 155.7, 162.6 (d,  $J = 249.3$  Hz), 196.6; HRMS-ESI ( $m/z$ ): calcd for  $C_{18}H_{13}FNO$  ( $M+H^+$ ): 278.0981, found 278.0981.

2-[2-(3-benzoyl)thienyl]pyridine (**3r**)

Light yellow liquid;  $^1H$  NMR (400 MHz,  $CDCl_3$ ):  $\delta$  7.07 (t,  $J = 5.86$  Hz, 1H), 7.23 (d,  $J = 5.0$  Hz, 1H), 7.32-7.38 (m, 3H), 7.42-7.49 (m, 3H), 7.82 (d,  $J = 7.52$  Hz, 2H), 8.47 (d,  $J = 3.8$  Hz, 1H);  $^{13}C$  NMR (100 MHz,  $CDCl_3$ ):  $\delta$  122.4, 122.5, 126.6, 128.4, 129.9, 130.0, 133.1, 136.3, 137.5, 137.8, 145.8, 149.4, 151.3, 193.8; HRMS-ESI ( $m/z$ ): calcd for  $C_{16}H_{12}NOS$  ( $M+H^+$ ): 266.0634, found 266.0639.

2-[2-(3-benzoyl)thienyl]-5-methylpyridine (**3s**)

Yellow liquid;  $^1H$  NMR (400 MHz,  $CDCl_3$ ):  $\delta$  2.24 (s, 3H), 7.21 (d,  $J = 5.16$  Hz, 1H), 7.27 (s, 2H), 7.32-7.41 (m, 3H), 7.48 (t,  $J = 7.36$  Hz, 1H), 7.82 (d,  $J = 7.44$  Hz, 2H), 8.31 (s, 1H);  $^{13}C$  NMR (100 MHz,  $CDCl_3$ ):  $\delta$  18.2, 122.1, 126.1, 128.4, 129.9, 130.0, 132.2, 133.1, 136.8, 137.3, 137.6, 146.1, 148.6, 149.8, 193.8; HRMS-ESI ( $m/z$ ): calcd for  $C_{17}H_{14}NOS$  ( $M+H^+$ ): 280.0791, found 280.0795.

10-benzoylbenzo[h]quinoline (**3t**)<sup>1</sup>

Yellow solid, mp 145–147 °C;  $^1H$  NMR (400 MHz,  $CDCl_3$ ):  $\delta$  7.27-7.37 (m, 3H), 7.38-7.46 (m, 1H), 7.64-7.67 (m, 1H), 7.73-7.83 (m, 4H), 7.91 (d,  $J = 8.8$  Hz, 1H), 8.04-8.12 (m, 2H), 8.52 (dd,  $J = 4.36$  Hz, 1.56 Hz, 1 H);  $^{13}C$  NMR (100 MHz,  $CDCl_3$ ):  $\delta$  121.7, 126.2, 126.4, 126.6, 127.0, 127.8, 127.9, 128.1, 128.5, 128.7, 129.0, 131.8, 133.8, 135.3, 138.9, 139.3, 144.6, 147.1; HRMS-ESI ( $m/z$ ): calcd for  $C_{20}H_{14}NO$  ( $M+H^+$ ): 284.1070, found 284.1074.

2-[2-(3,4-dimethoxybenzoyl)phenyl]-3-methylpyridine (**3u**)

Light yellow solid, mp 124–126 °C;  $^1H$  NMR (400 MHz,  $CDCl_3$ ):  $\delta$  2.14 (s, 3H), 3.78 (s, 3H), 3.81 (s, 3H), 6.67 (d,  $J = 8.36$  Hz, 1H), 6.94 (dd,  $J = 6.94$  Hz, 4.80 Hz, 1H), 7.19-7.23 (m, 1H), 7.25-7.27 (m, 1H), 7.32-7.43 (m, 3H), 7.48-7.52 (m, 2H), 8.21 (d,  $J = 4.12$  Hz, 1H);  $^{13}C$  NMR (100 MHz,  $CDCl_3$ ):  $\delta$  19.6, 55.9, 56.0, 109.5, 111.3, 122.2, 125.7, 127.5, 129.3, 129.9, 130.1, 130.5, 131.7, 137.7, 139.2, 140.5, 146.4, 148.6, 152.9, 157.9, 196.2; HRMS-ESI ( $m/z$ ): calcd for  $C_{21}H_{20}NO_3$  ( $M+H^+$ ): 334.1438, found 334.1442.

3-methyl-2-[2-(4-methylbenzoyl)phenyl]pyridine (**3v**)

Light yellow solid, mp 82–84 °C;  $^1H$  NMR (400 MHz,  $CDCl_3$ ):  $\delta$  2.21 (s, 3H), 2.34 (s, 3H), 7.0 (dd,  $J = 7.68$  Hz, 4.80 Hz, 1H), 7.11 (d,  $J = 8.08$  Hz, 2H), 7.26 (s, 1H), 7.39 (d,  $J = 7.72$  Hz, 1H), 7.44-7.51 (m, 2H), 7.55-7.61 (m, 4H);  $^{13}C$  NMR (100 MHz,  $CDCl_3$ ):  $\delta$  19.6, 21.7, 122.2, 127.6, 128.7, 129.5, 130.0, 130.1, 130.3, 131.6, 135.1, 137.8, 139.3, 140.7, 143.4, 146.5, 157.9, 197.3; HRMS-ESI ( $m/z$ ): calcd for  $C_{20}H_{18}NO$  ( $M+H^+$ ): 288.1383, found 288.1388.

2-[2-(3,4-dichlorobenzoyl)phenyl]-3-methylpyridine (**3w**)

Light yellow liquid;  $^1H$  NMR (400 MHz,  $CDCl_3$ ):  $\delta$  2.26 (s, 3H), 7.0 (dd,  $J = 7.20$  Hz, 4.84 Hz, 1H), 7.35 (d,  $J = 8.24$  Hz, 1H), 7.42 (d,  $J = 7.36$  Hz, 1H), 7.46-7.55 (m, 3H), 7.59-7.64 (m, 2H), 7.68 (s, 1H), 8.25 (d,  $J = 3.72$  Hz, 1H);  $^{13}C$  NMR (100 MHz,  $CDCl_3$ ):  $\delta$  19.5, 122.4, 128.0, 128.6,

129.5, 130.0, 130.1, 130.8, 131.3, 131.6, 132.4, 136.8, 137.4, 138.1, 138.3, 140.6, 146.5, 157.0, 195.4; HRMS-ESI (m/z): calcd for C<sub>19</sub>H<sub>14</sub>Cl<sub>2</sub>NO (M+H<sup>+</sup>): 342.0452, found 342.0450.

2-[2-(4-bromobenzoyl)phenyl]-3-methylpyridine (**3x**)

Light yellow solid, mp 118–120 °C; <sup>1</sup>H NMR (400 MHz, CDCl<sub>3</sub>): δ 2.13 (s, 3H), 6.91 (dd, *J* = 6.98 Hz, 4.96 Hz, 1H), 7.30–7.35 (m, 3H), 7.37–7.45 (m, 4H), 7.48–7.54 (m, 2H), 8.17 (d, *J* = 3.72 Hz, 1H); <sup>13</sup>C NMR (100 MHz, CDCl<sub>3</sub>): δ 19.5, 122.3, 127.6, 127.8, 129.3, 130.0, 130.6, 131.2, 131.3, 131.6, 136.5, 137.9, 138.7, 140.6, 146.5, 157.4, 196.7; HRMS-ESI (m/z): calcd for C<sub>19</sub>H<sub>15</sub>BrNO (M+H<sup>+</sup>): 352.0337, found 352.0333.

3-methyl-2-[2-(4-trifluoromethylbenzoyl)phenyl]pyridine (**3y**)

Light yellow solid, mp 65–67 °C; <sup>1</sup>H NMR (400 MHz, CDCl<sub>3</sub>): δ 2.25 (s, 3H), 6.99 (t, *J* = 4.94 Hz, 1H), 7.38–7.41 (m, 1H), 7.40–7.47 (m, 4H), 7.53 (d, *J* = 6.40 Hz, 2H), 7.74 (d, *J* = 7.52 Hz, 2H), 8.24 (s, 1H); <sup>13</sup>C NMR (100 MHz, CDCl<sub>3</sub>): δ 19.5, 122.2, 122.4, 124.9 (q, *J* = 3.7 Hz), 127.9, 128.0, 128.0 (q, *J* = 200.0 Hz), 129.7, 130.0, 130.9, 133.5 (q, *J* = 32.5 Hz), 138.0, 138.5, 140.8, 140.8, 146.5, 157.2, 196.8; HRMS-ESI (m/z): calcd for C<sub>20</sub>H<sub>15</sub>F<sub>3</sub>NO (M+H<sup>+</sup>): 342.1106, found 342.1104.

**References:**

1. F. H. Xiao, Q. Shuai, F. Zhao, O. Baslè, G. J. Deng and C. J. Li, *Org. Lett.*, 2011, **13**, 1614.



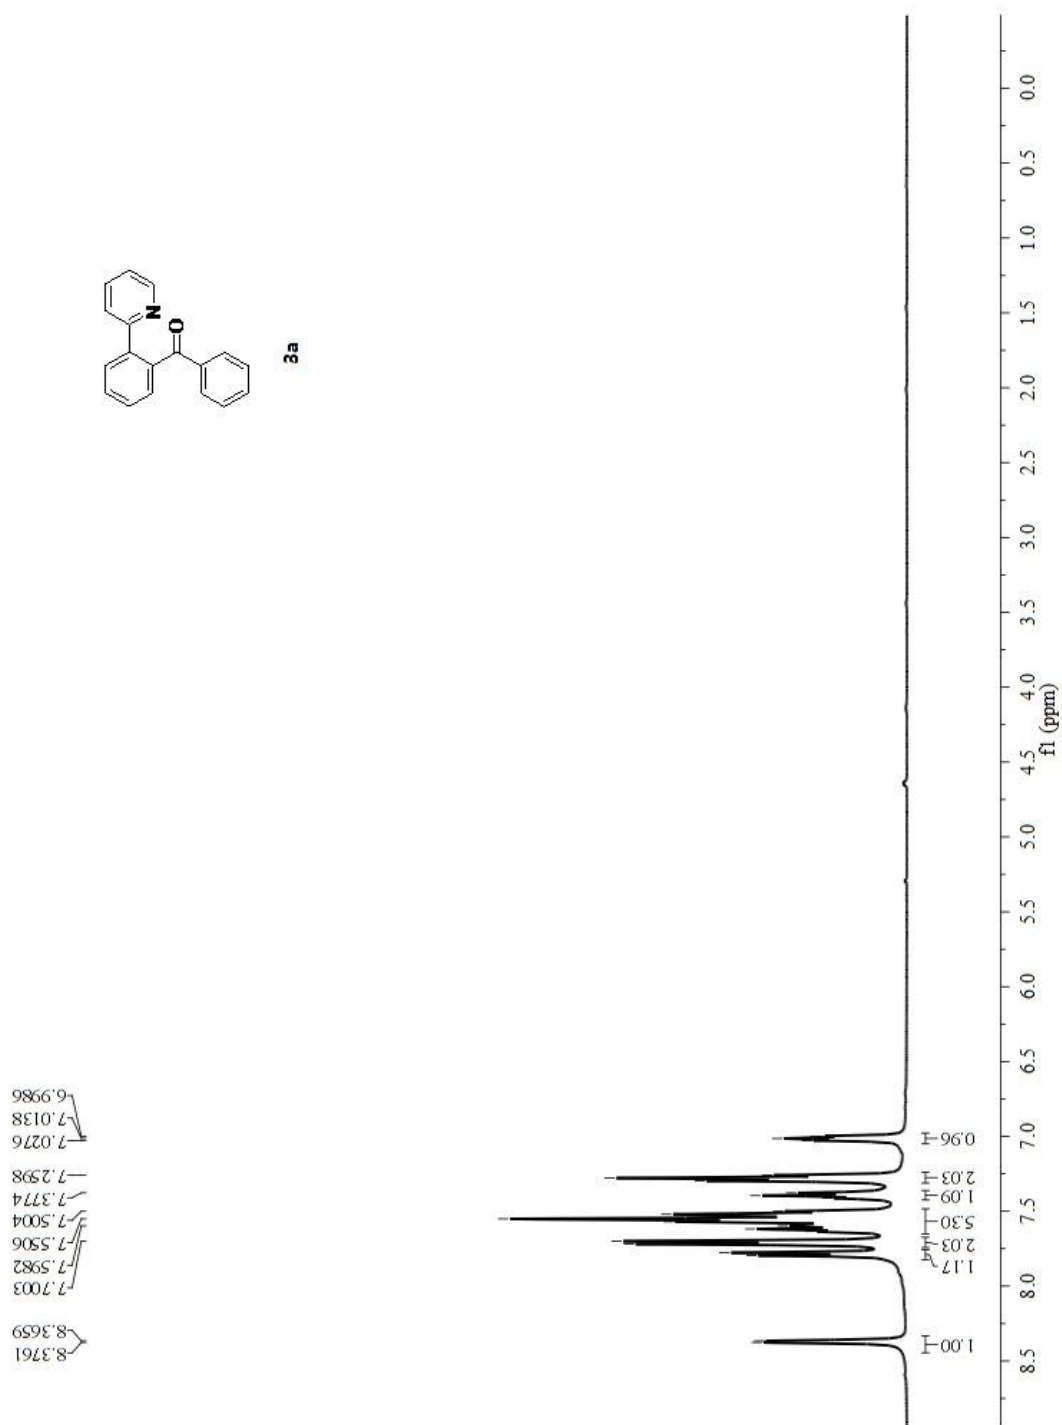

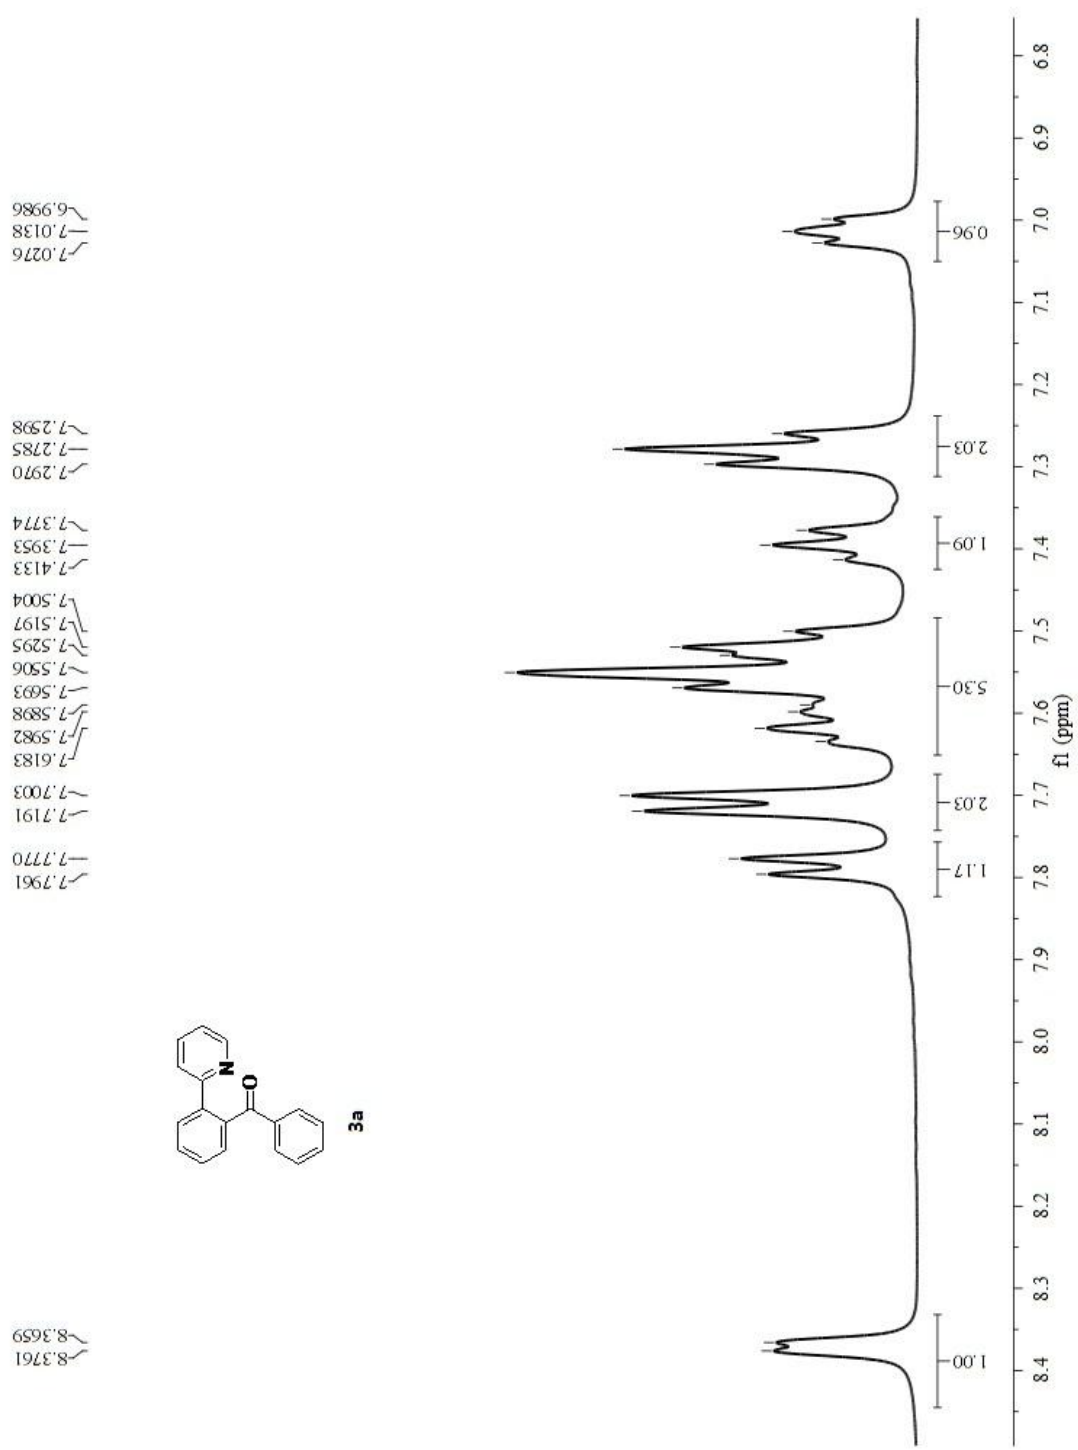

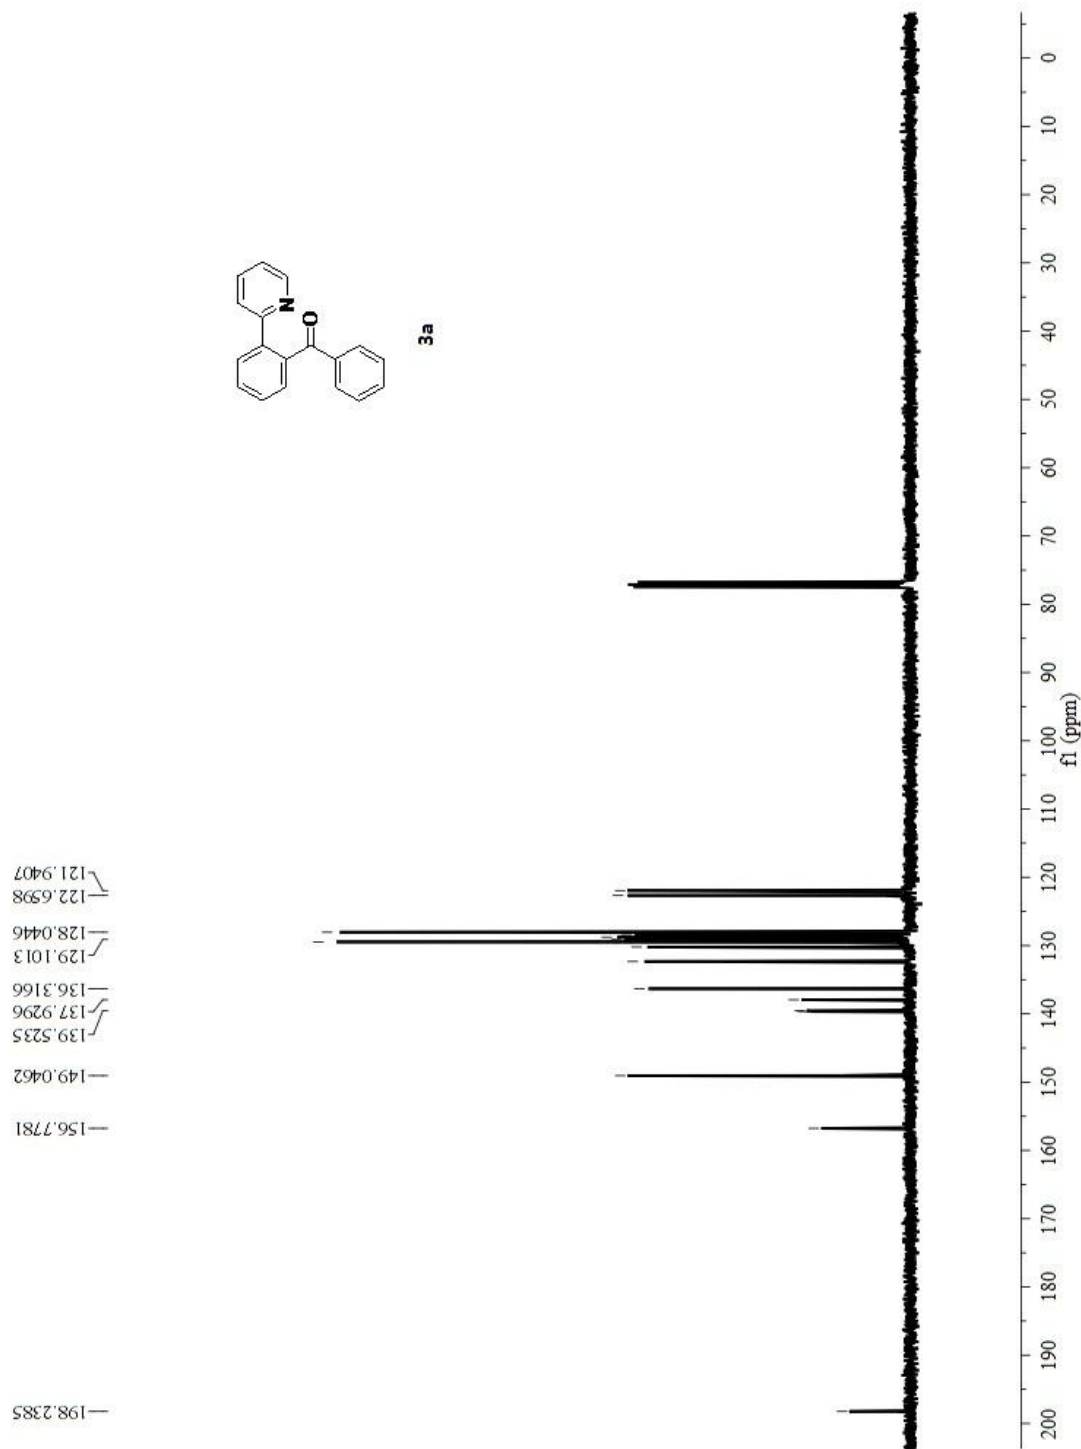

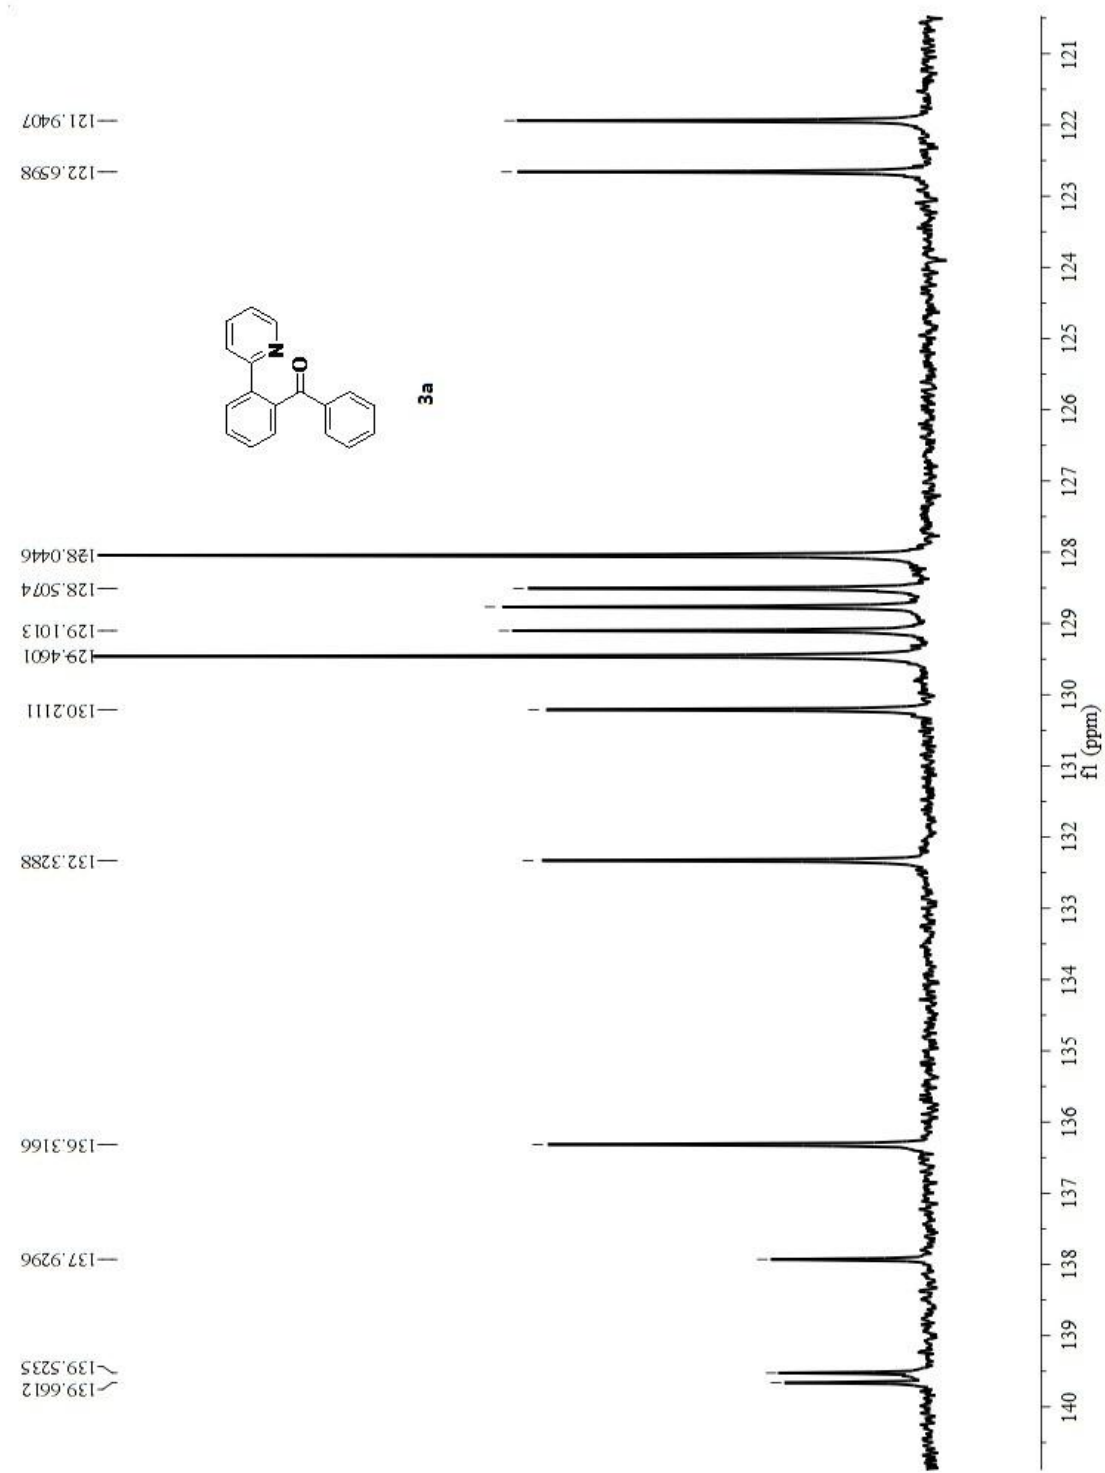

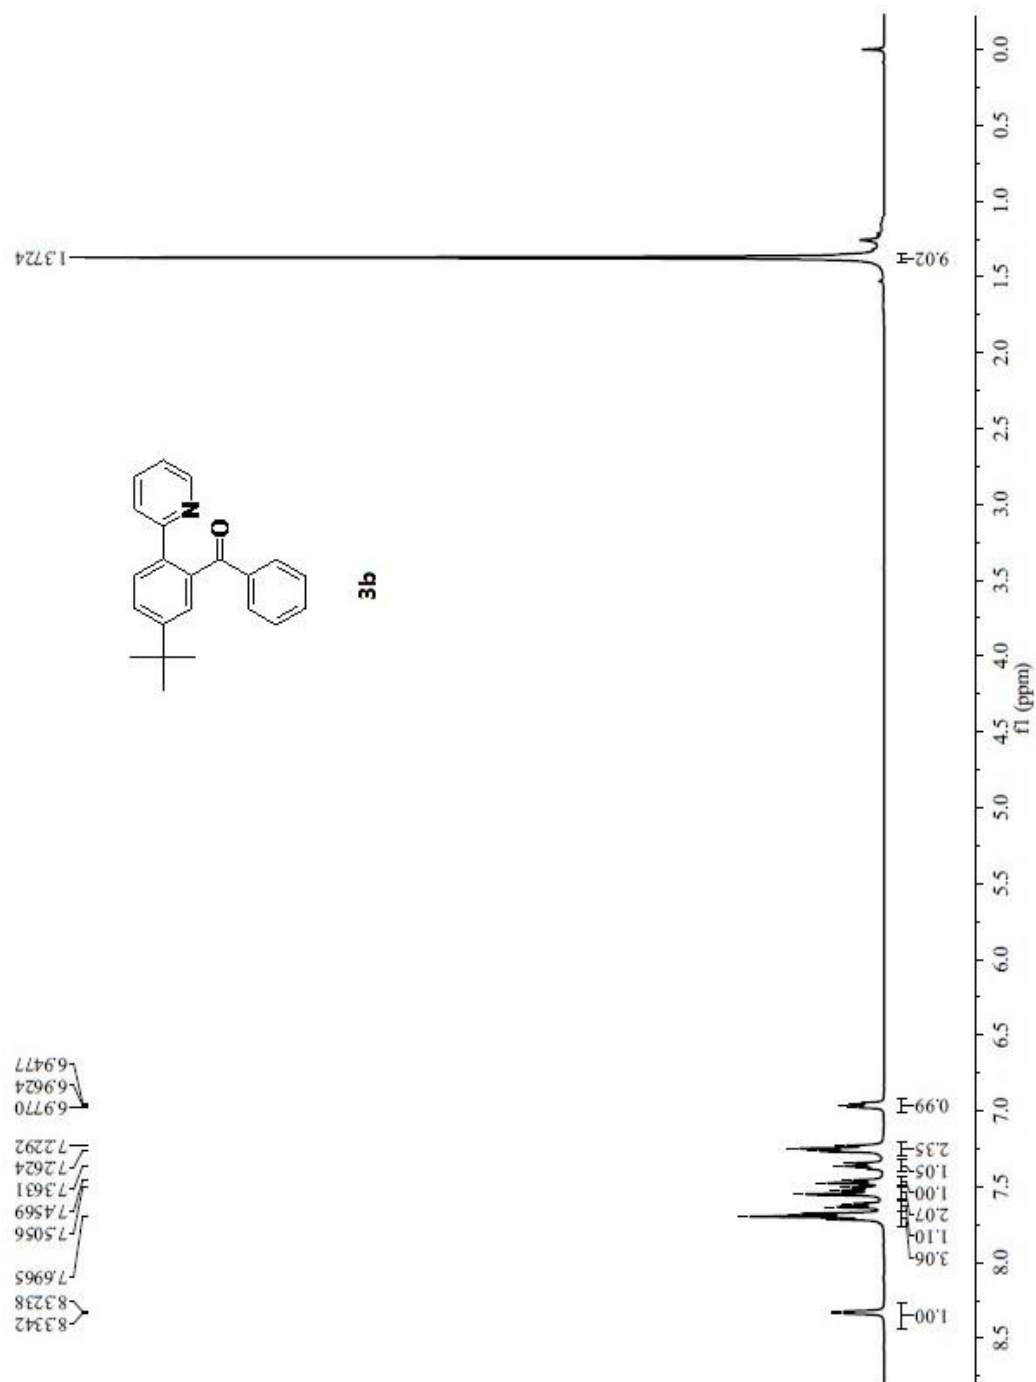

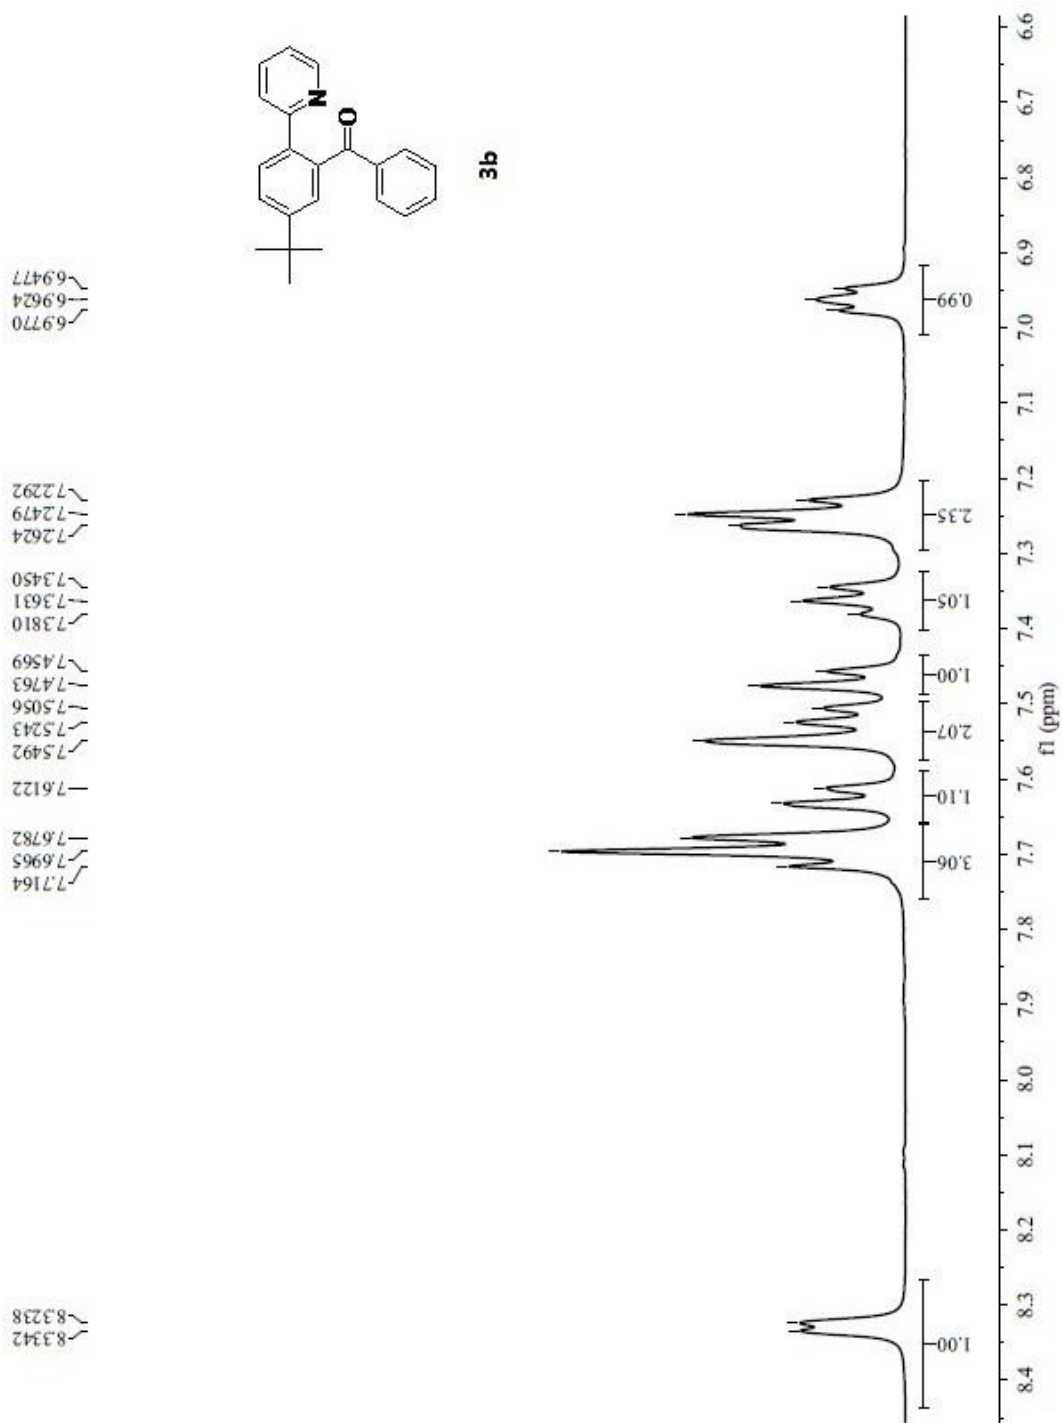

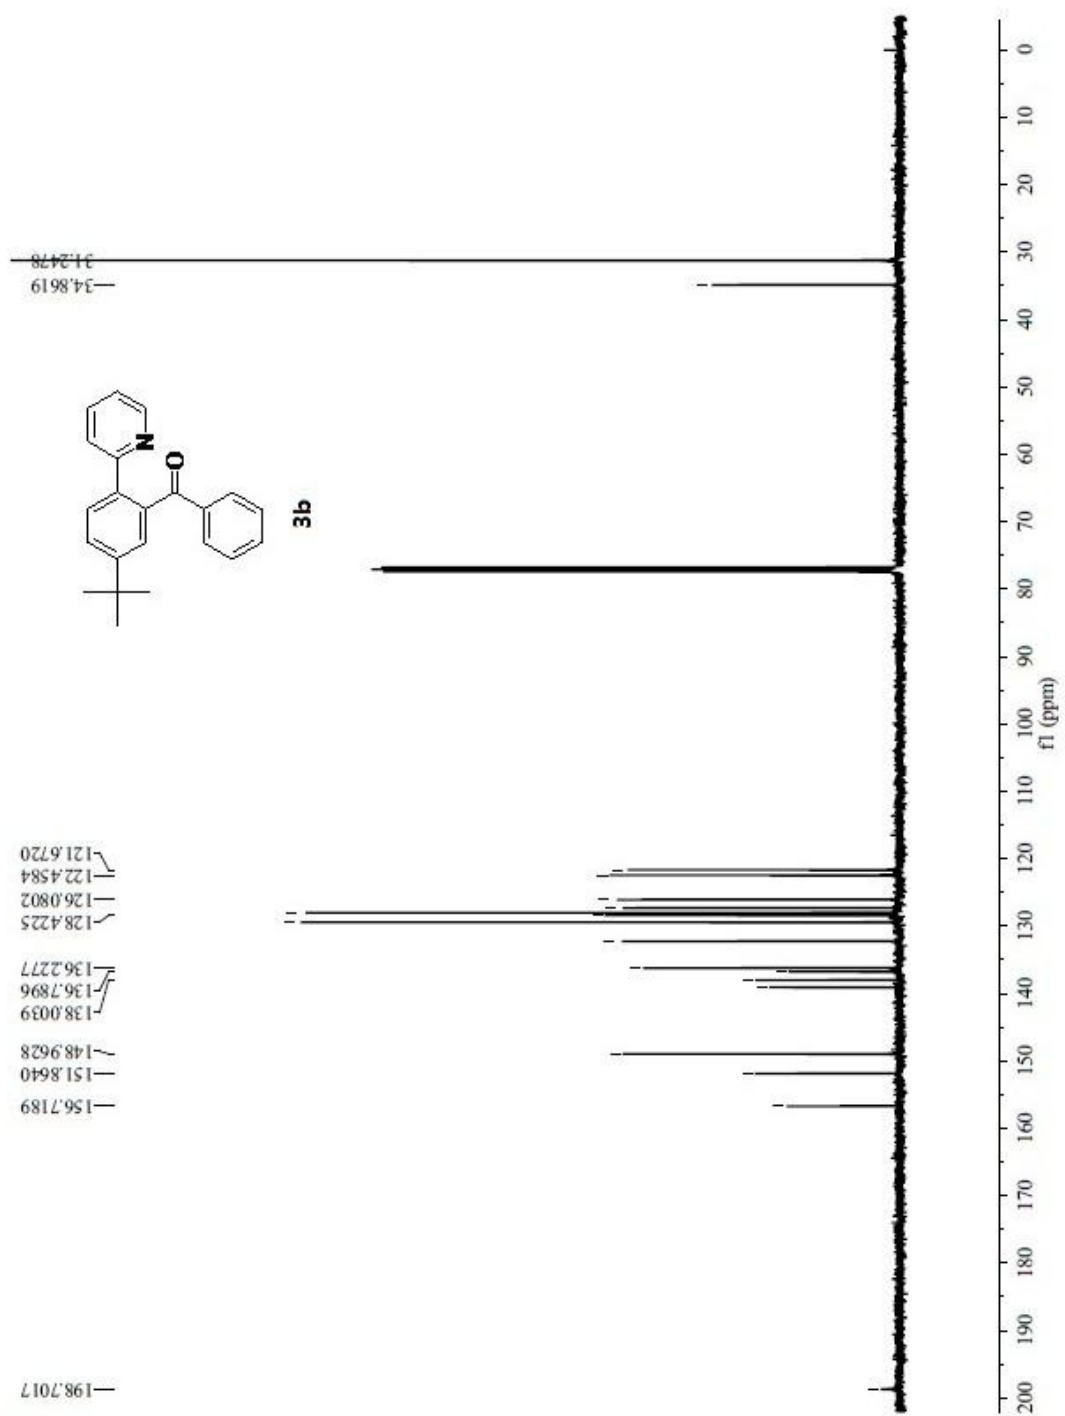

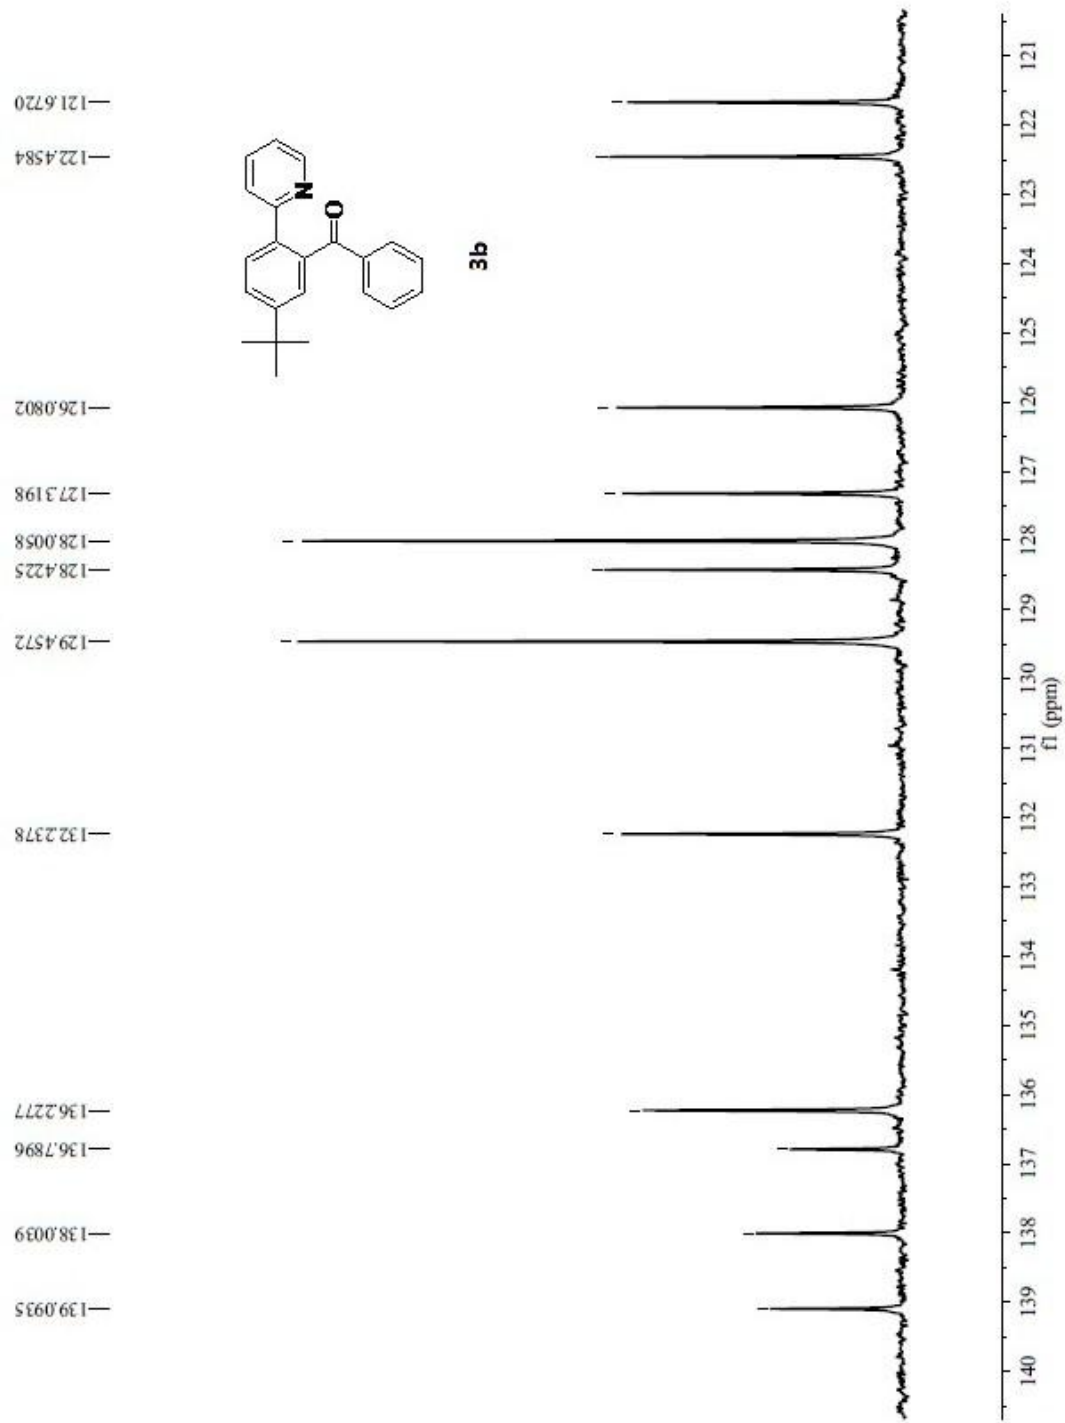



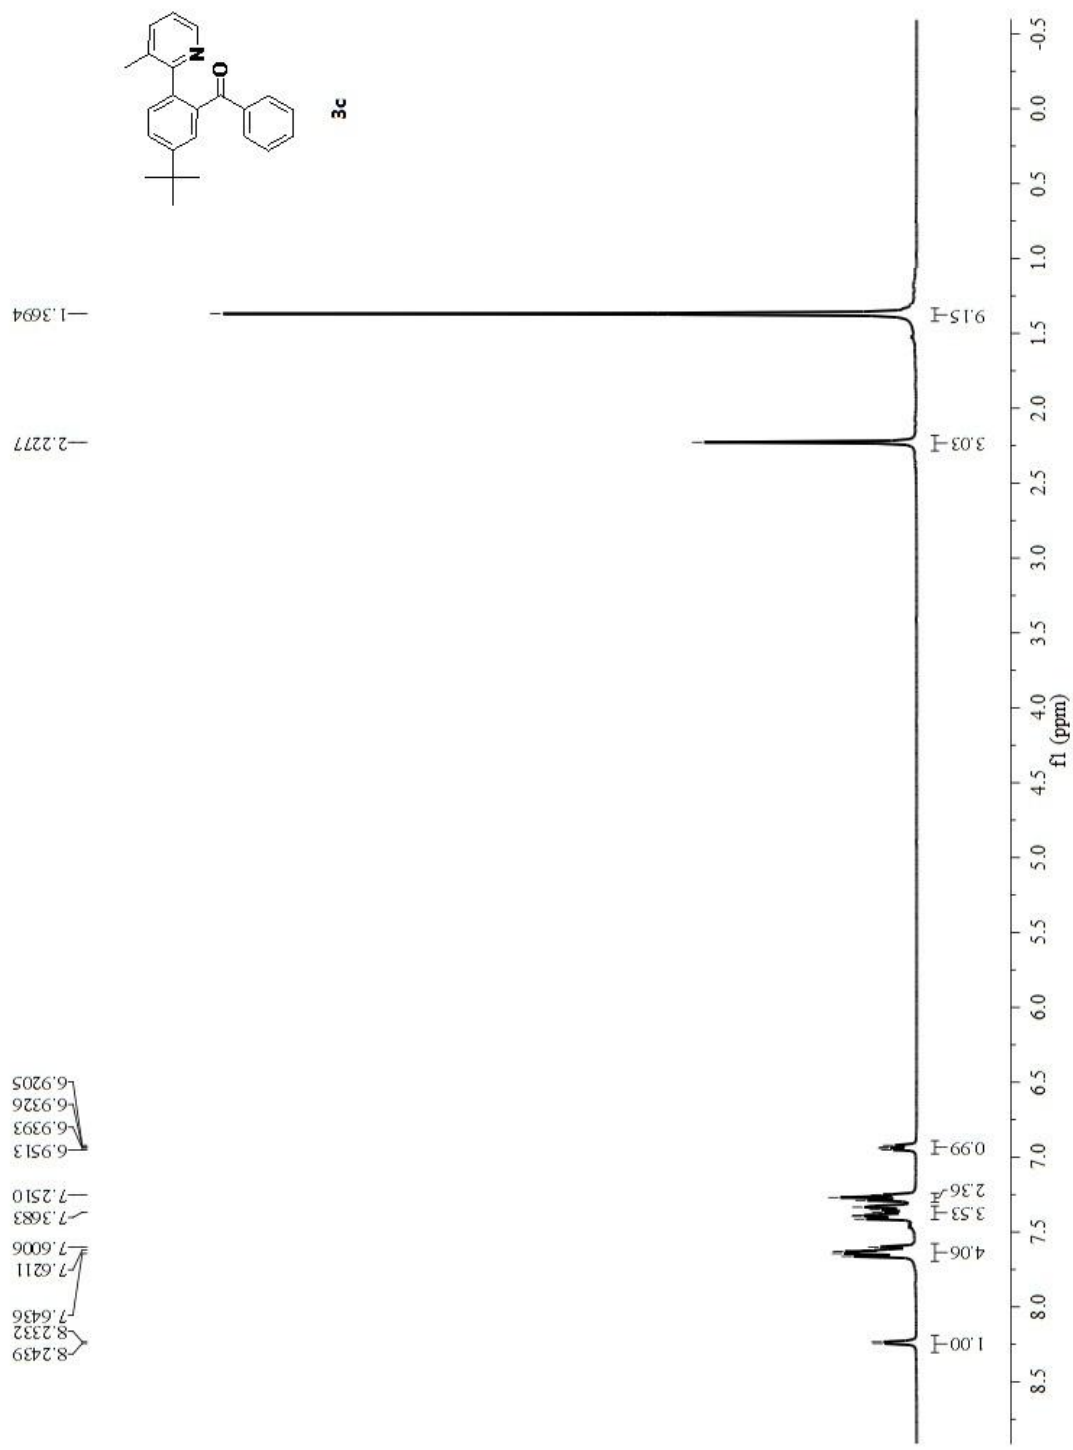

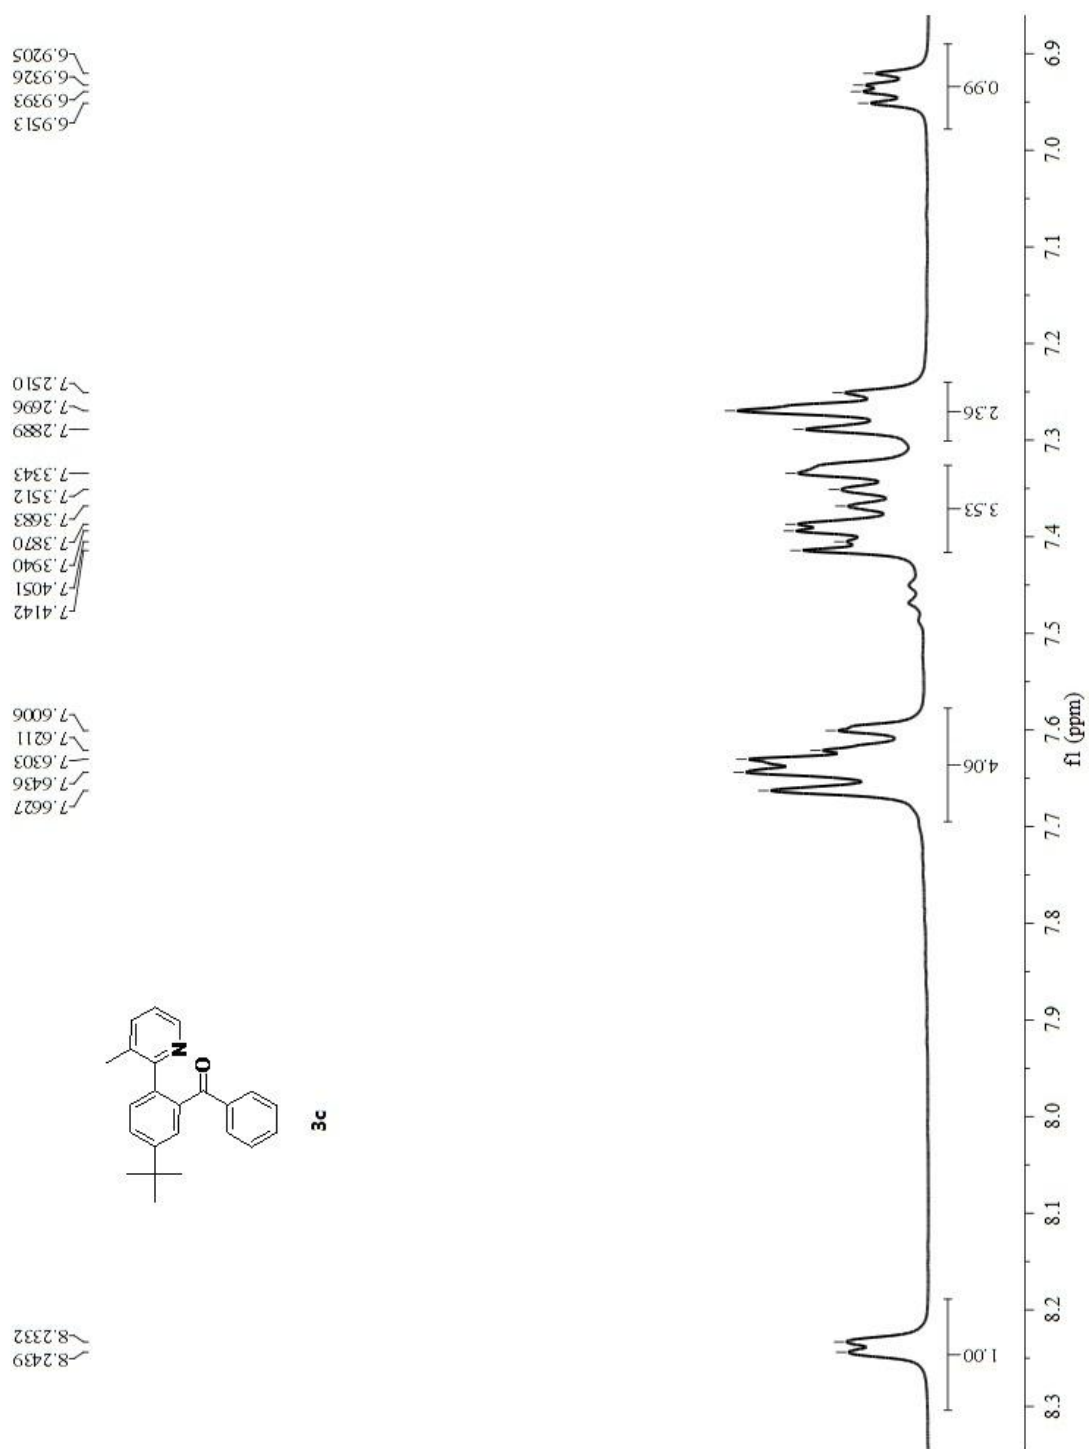

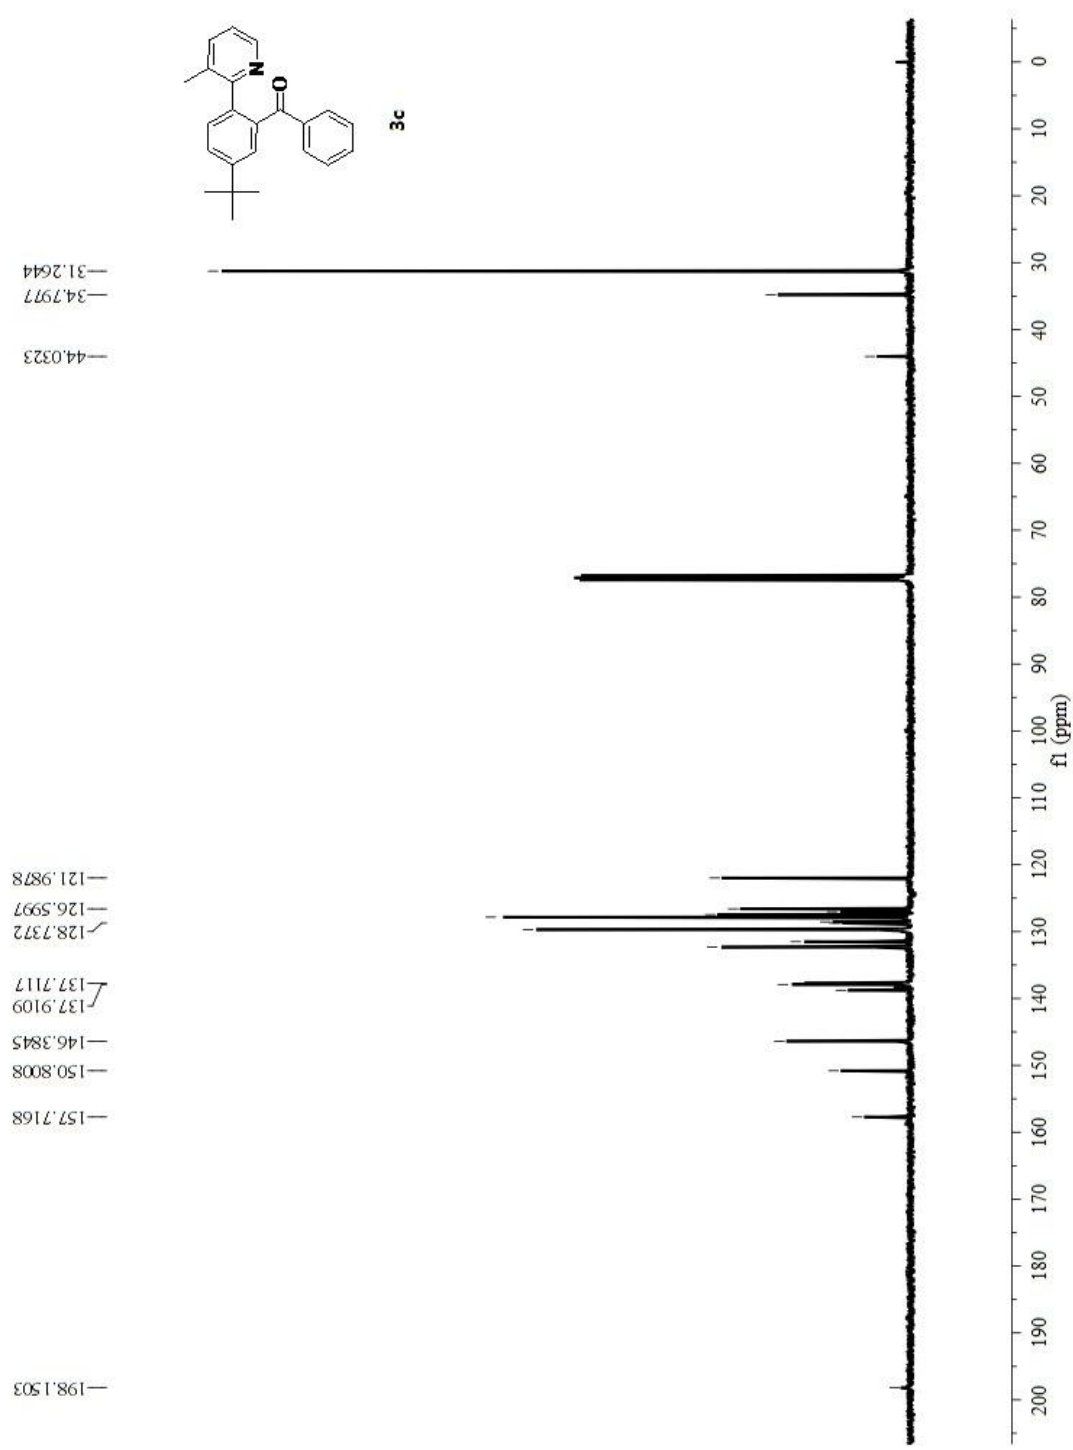

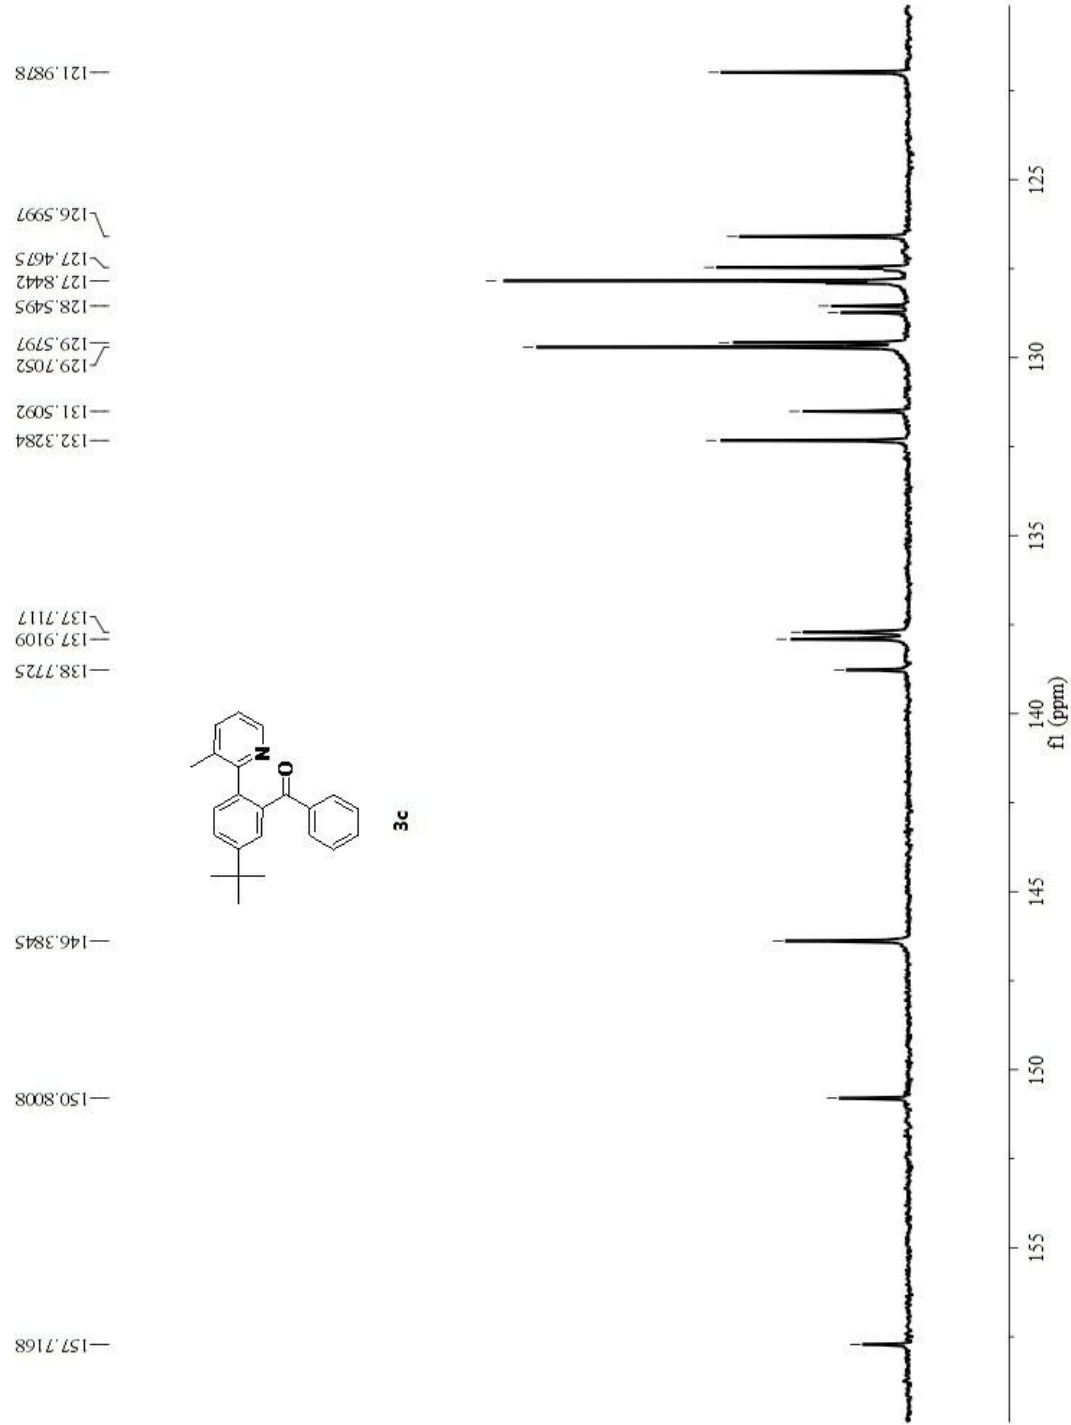

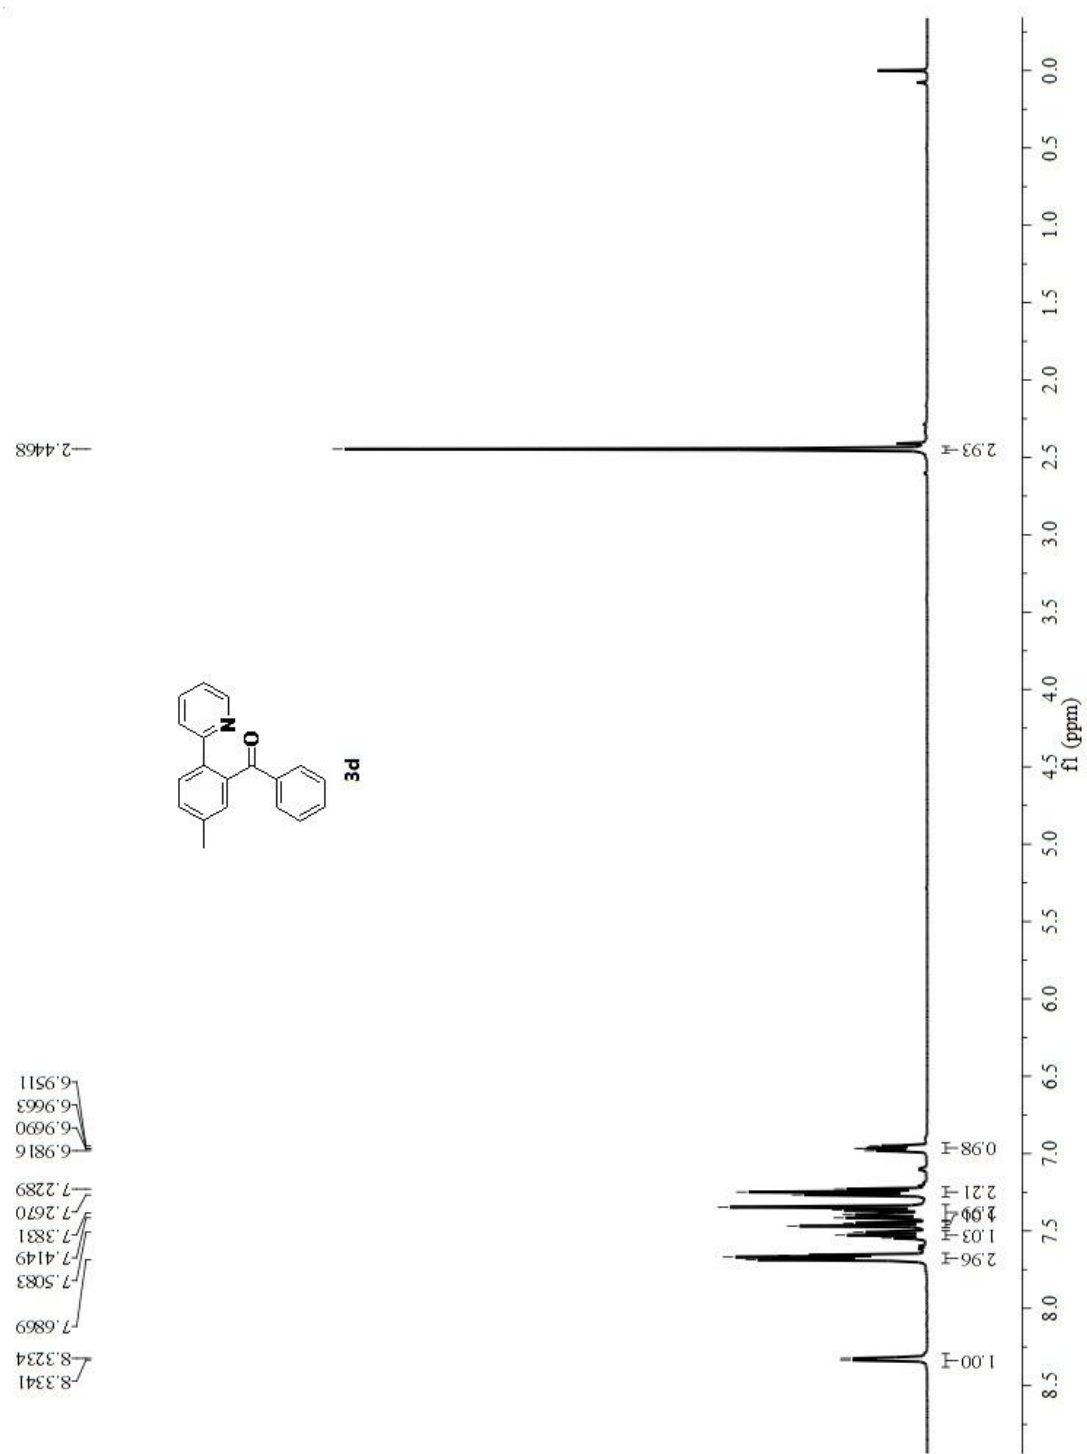

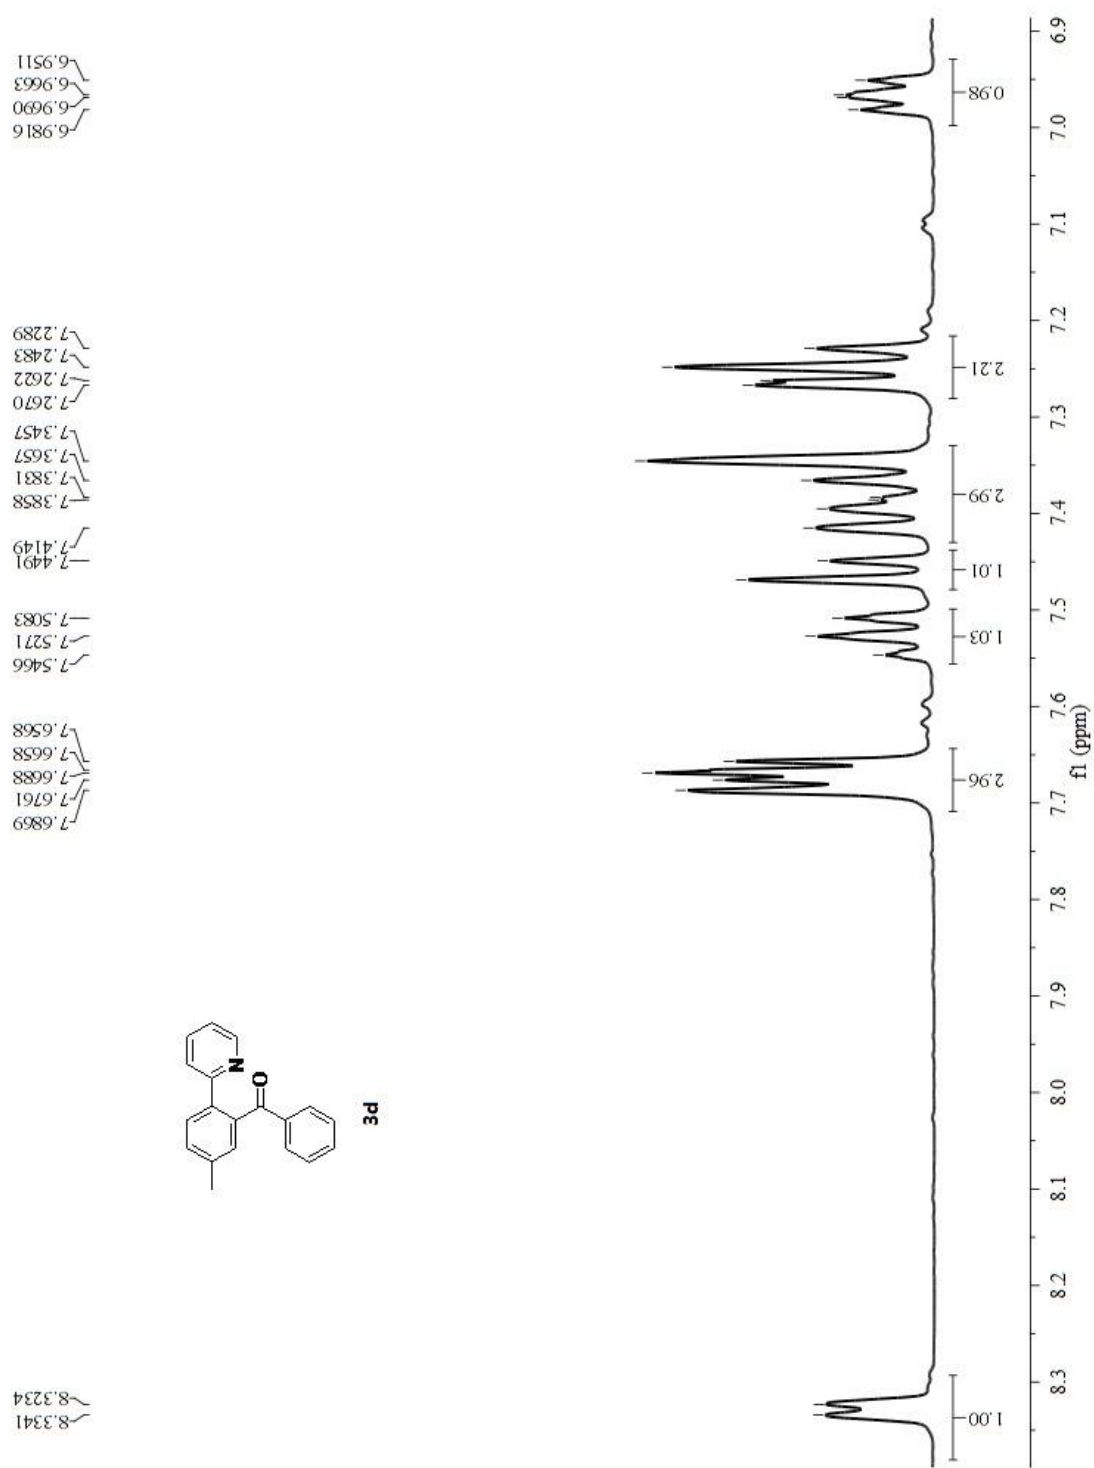

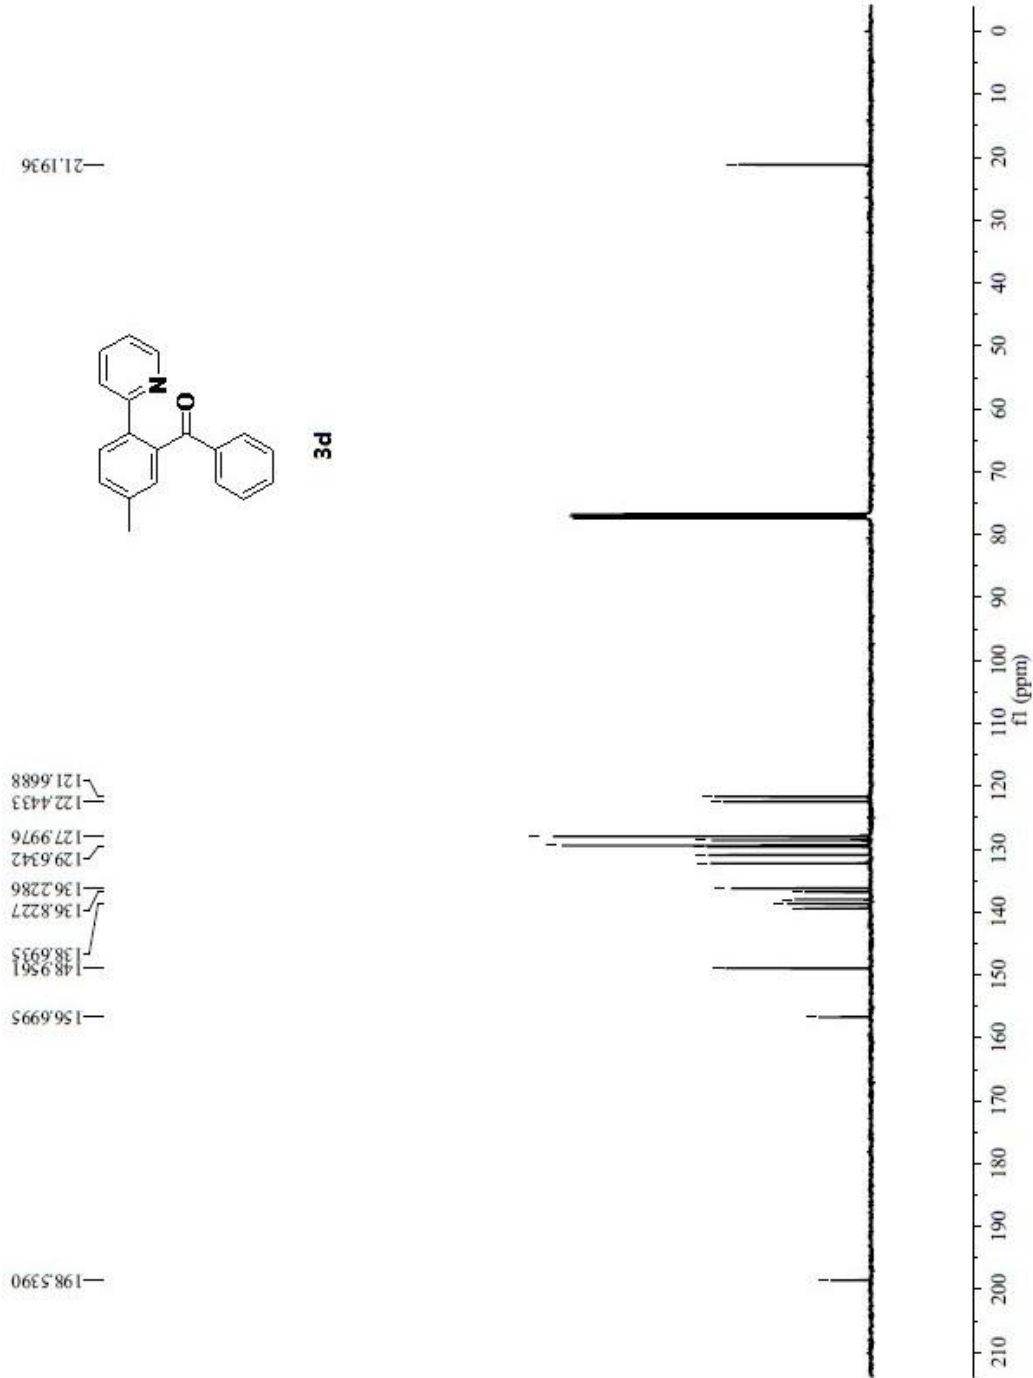

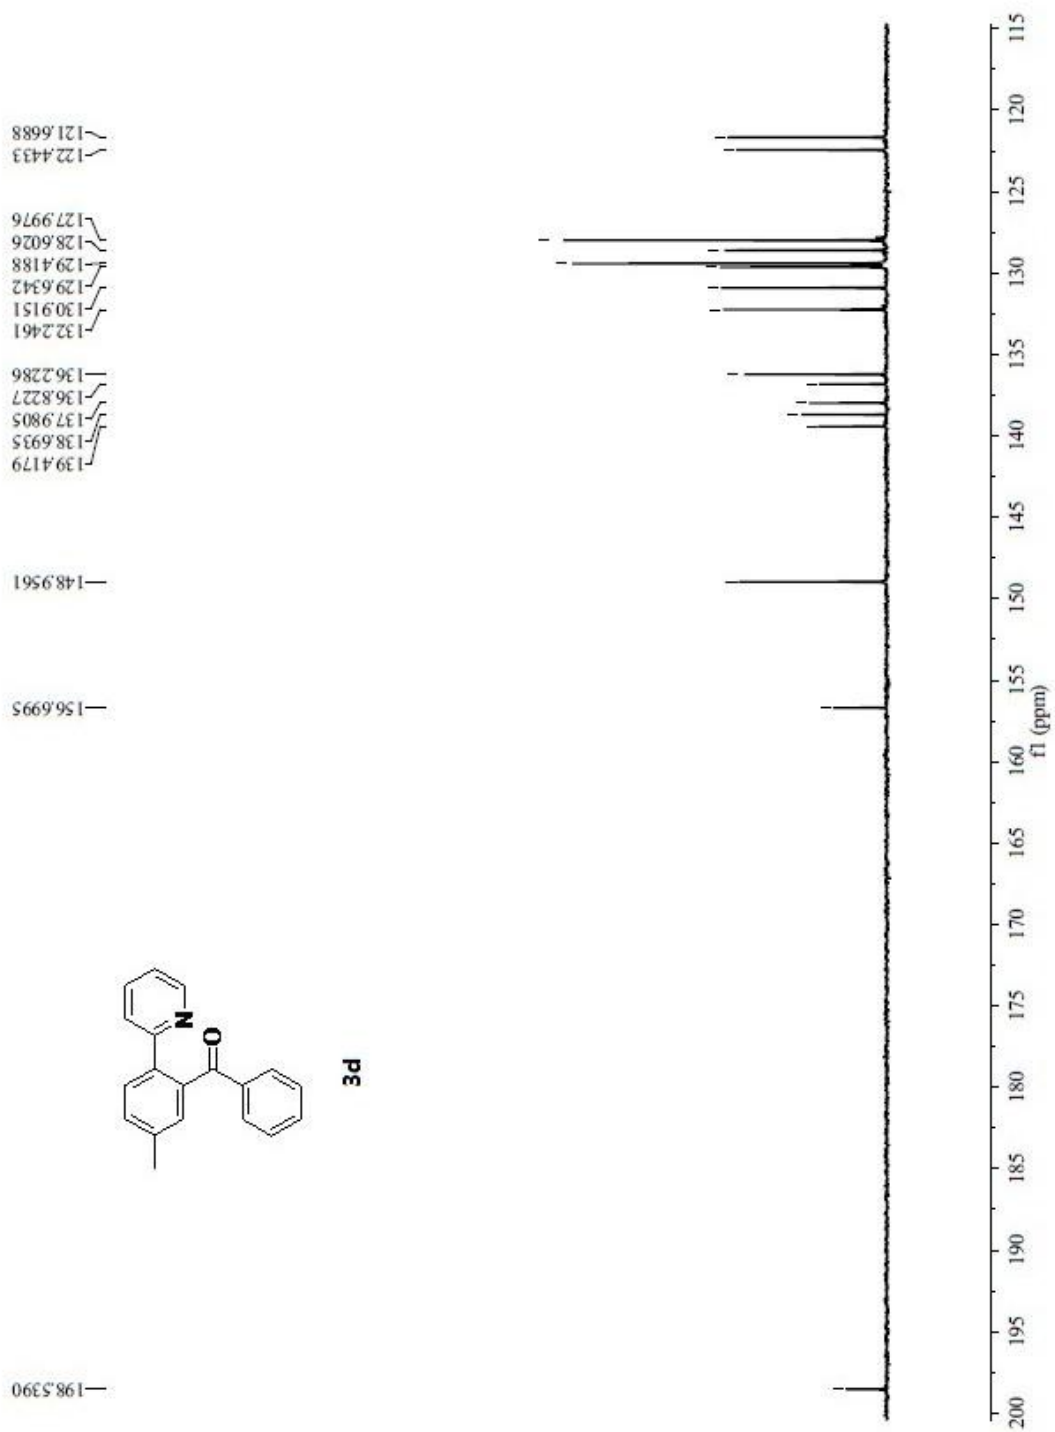



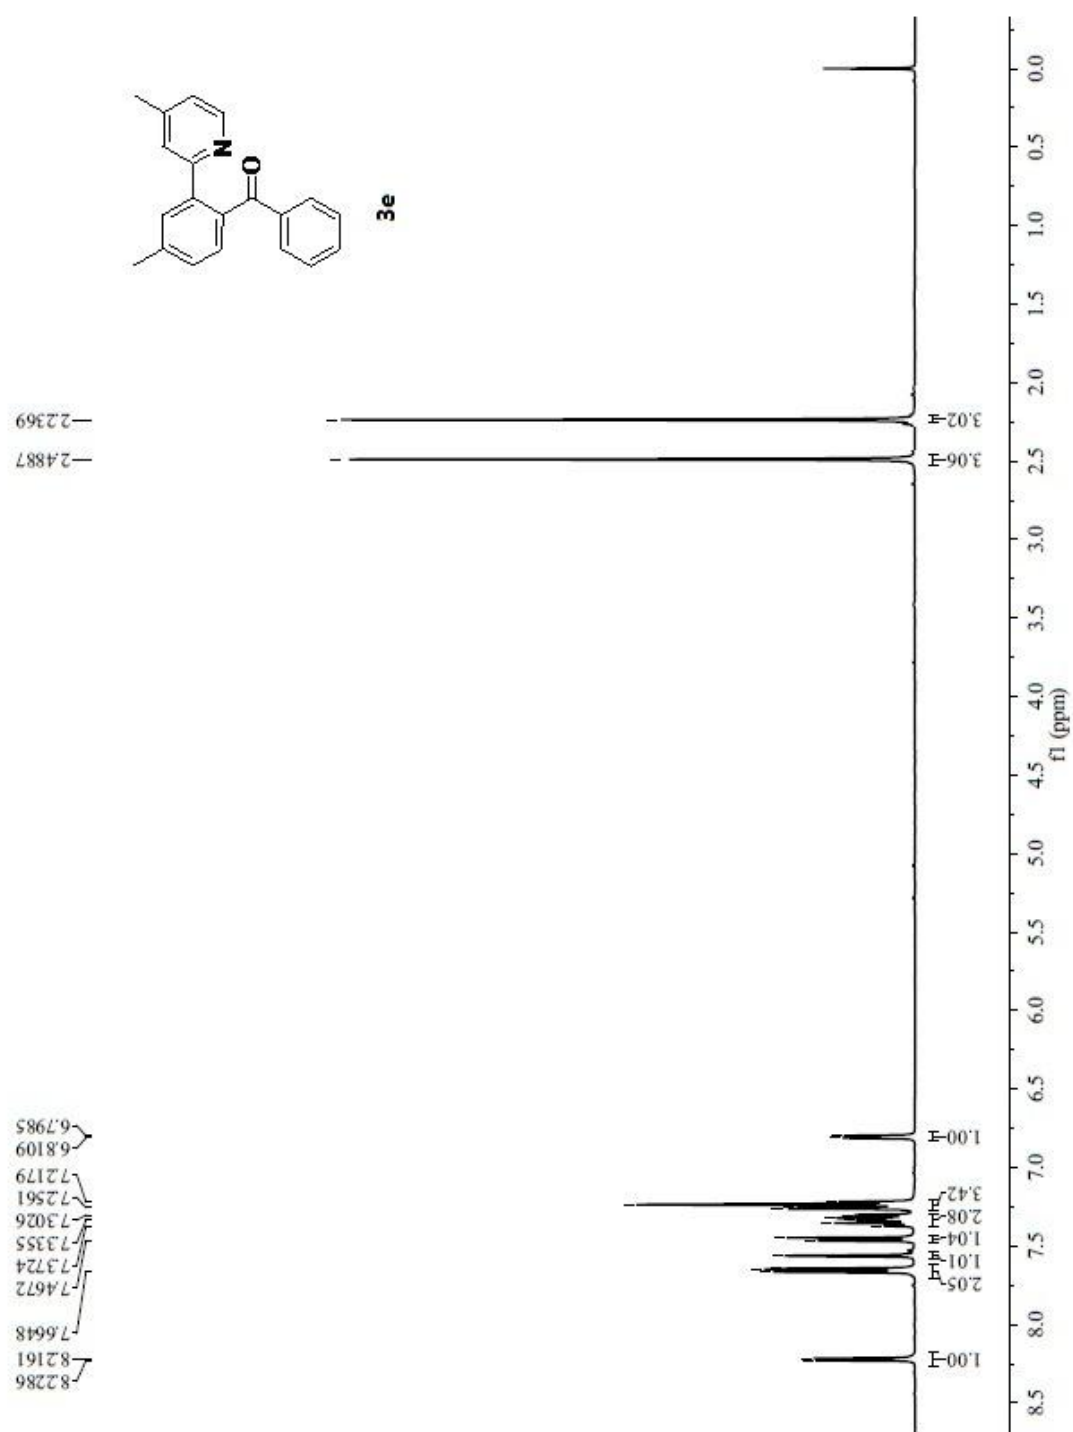

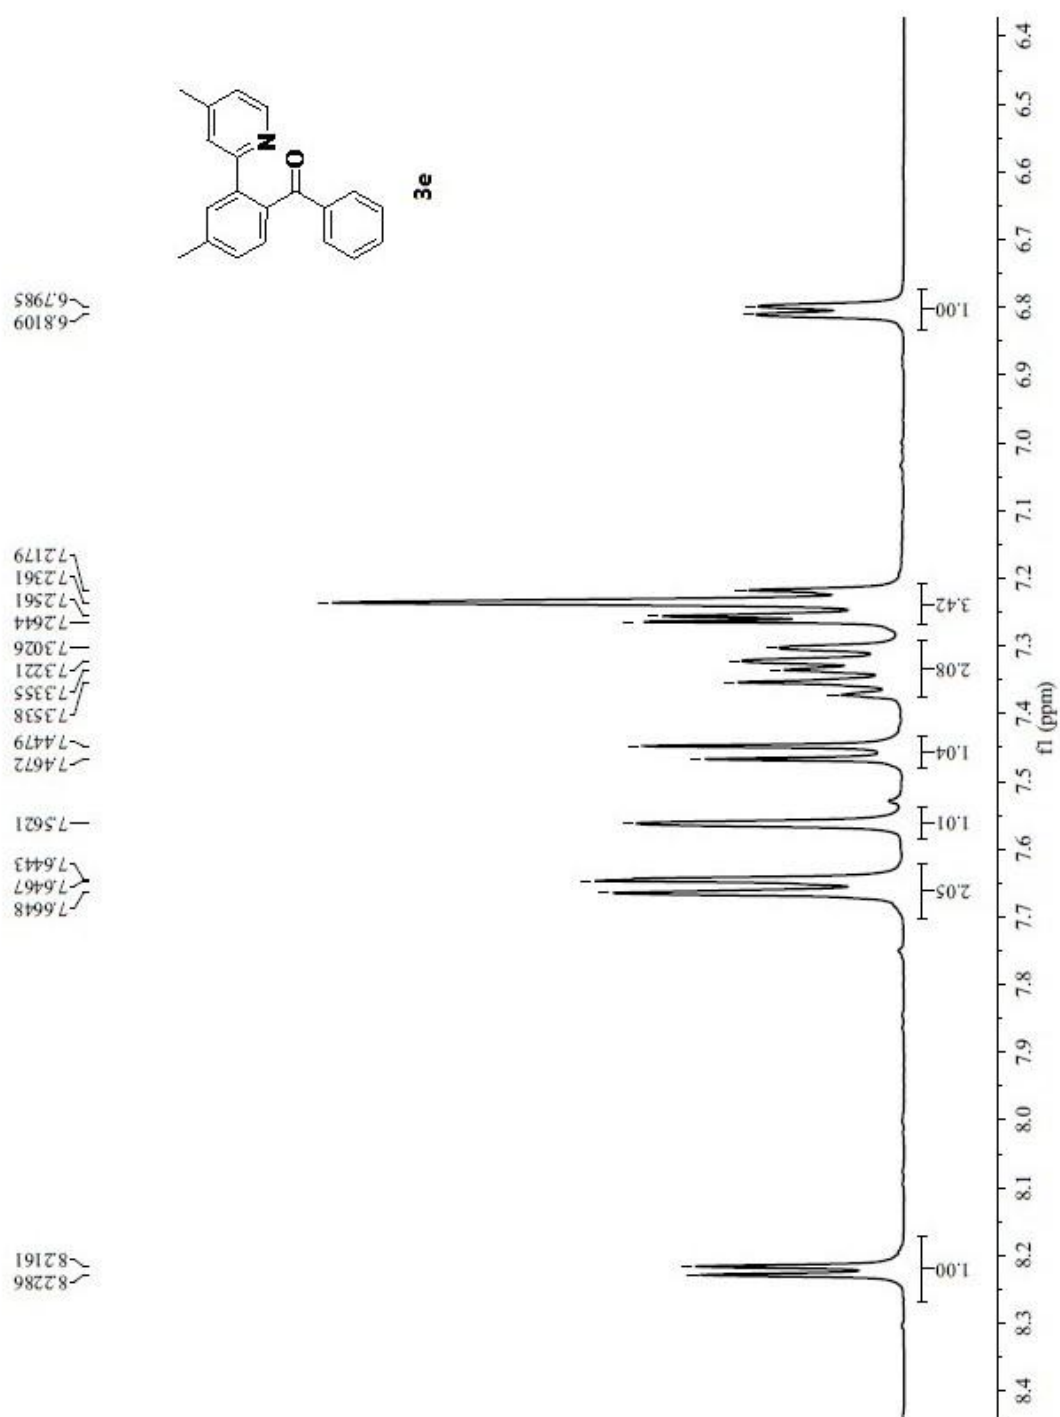

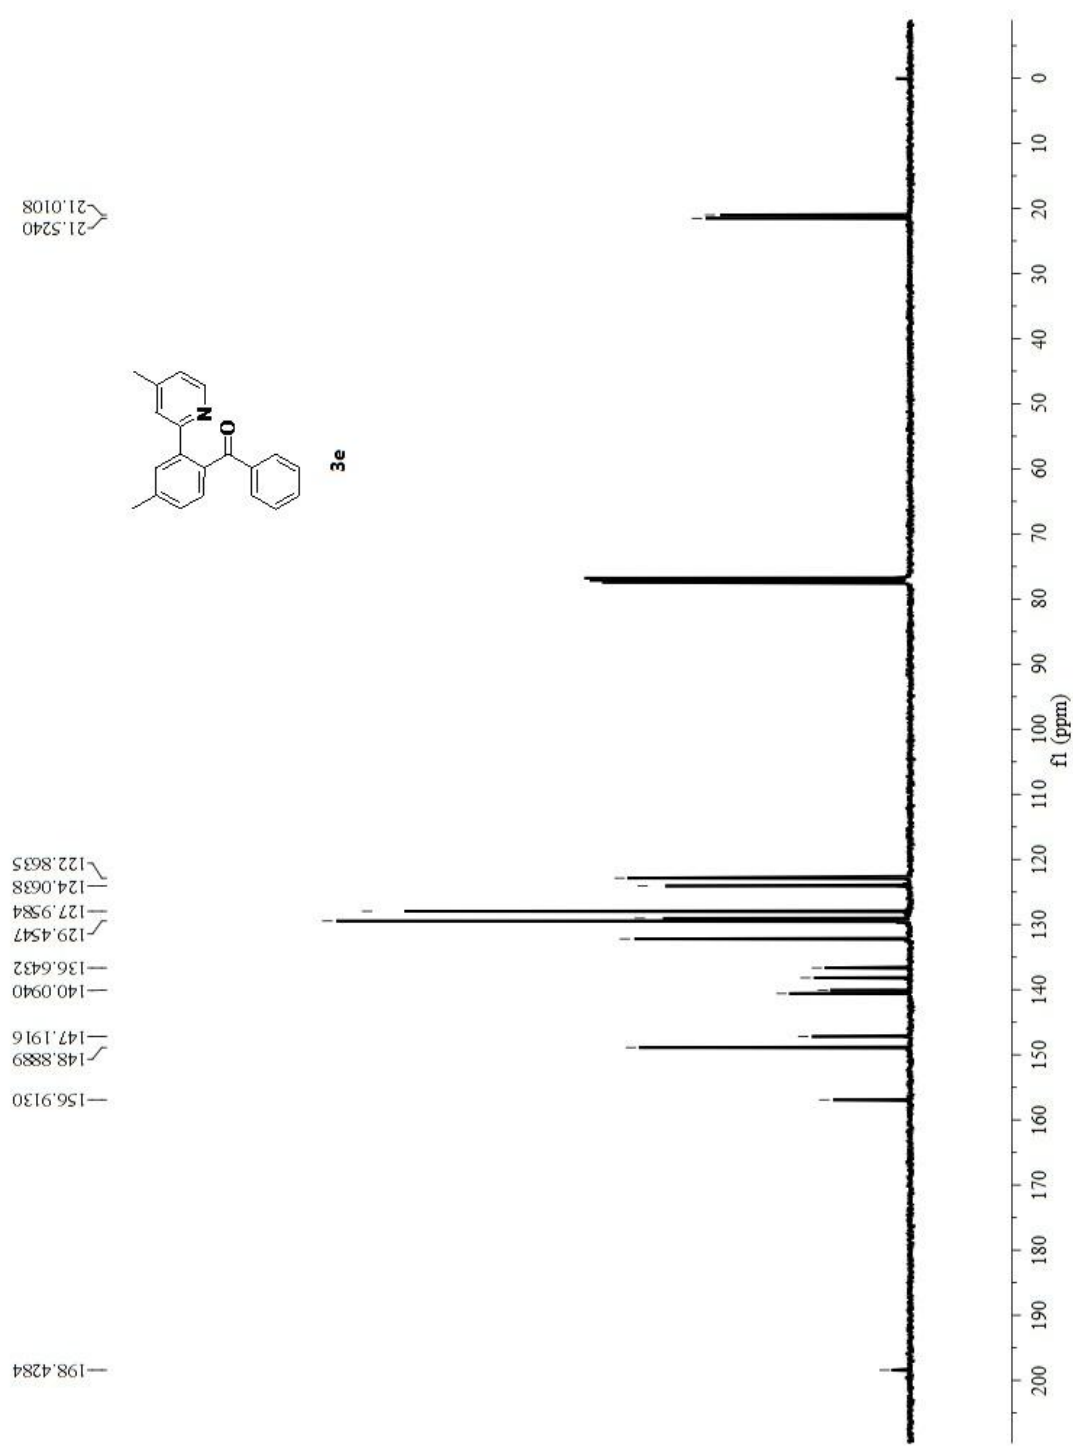

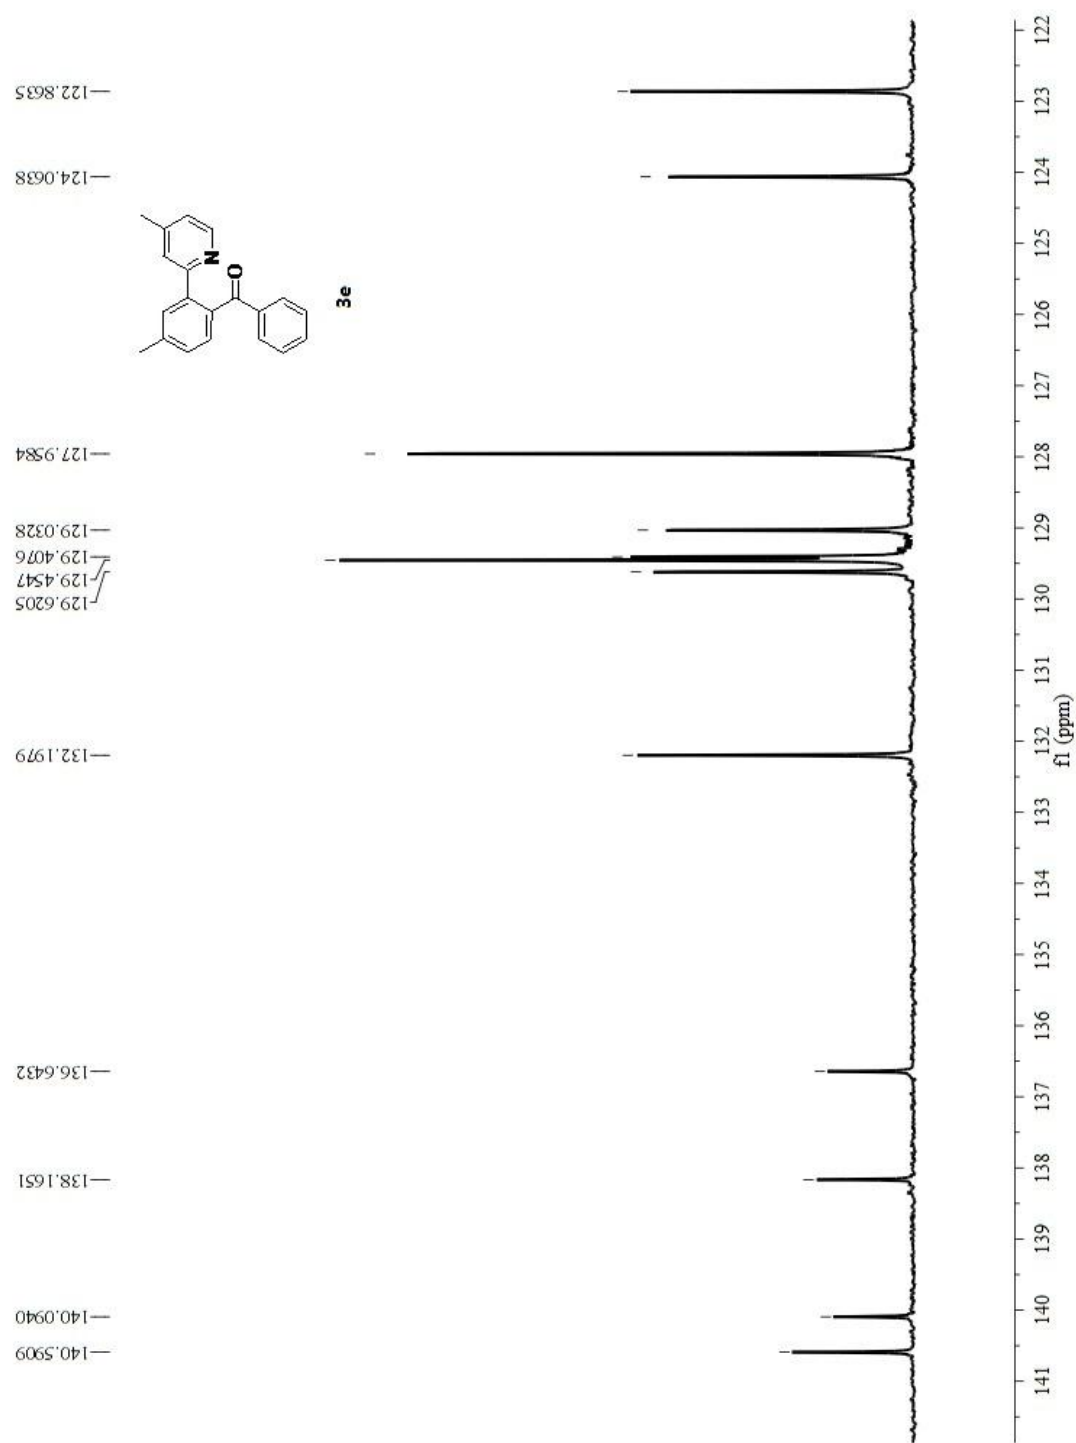

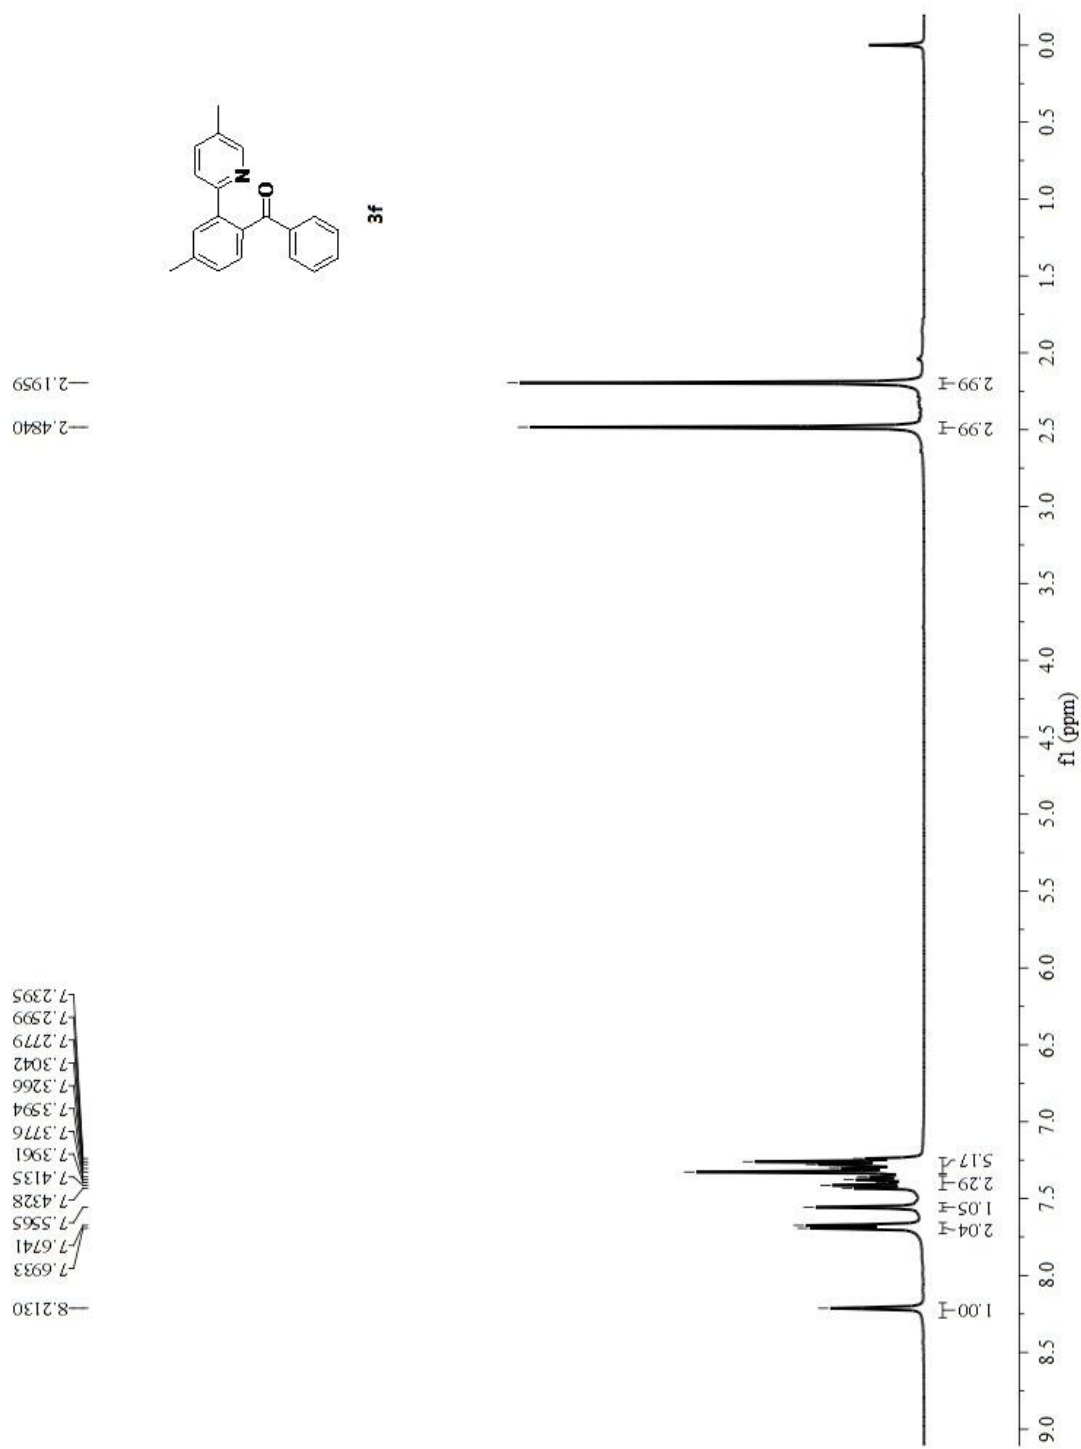

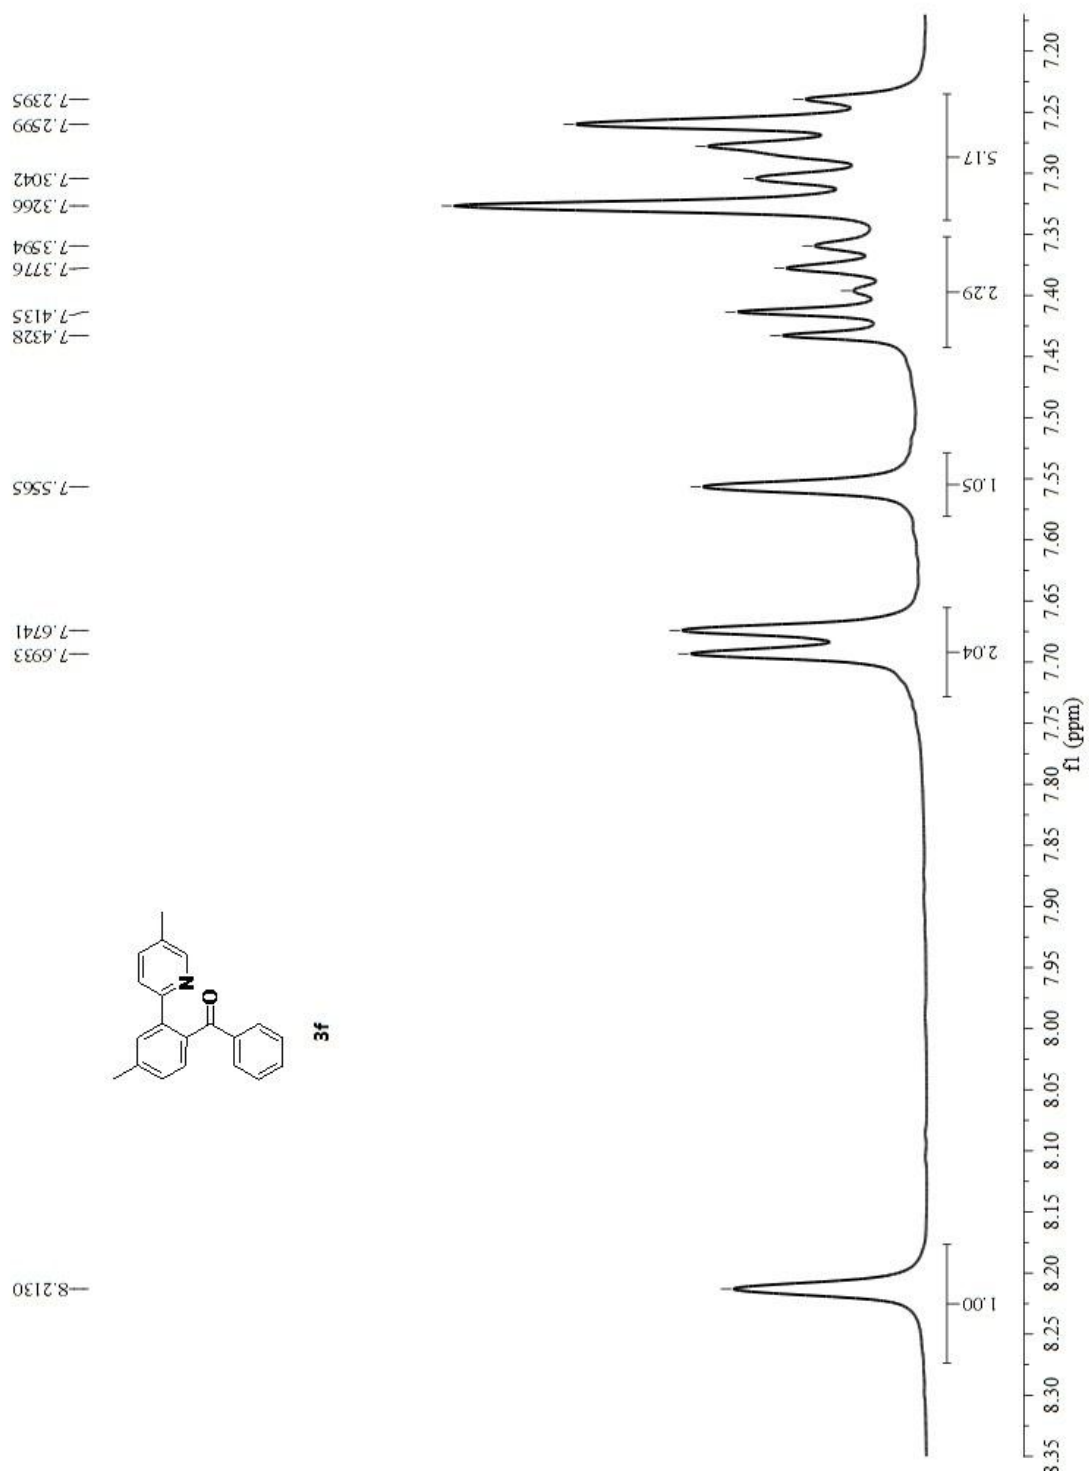

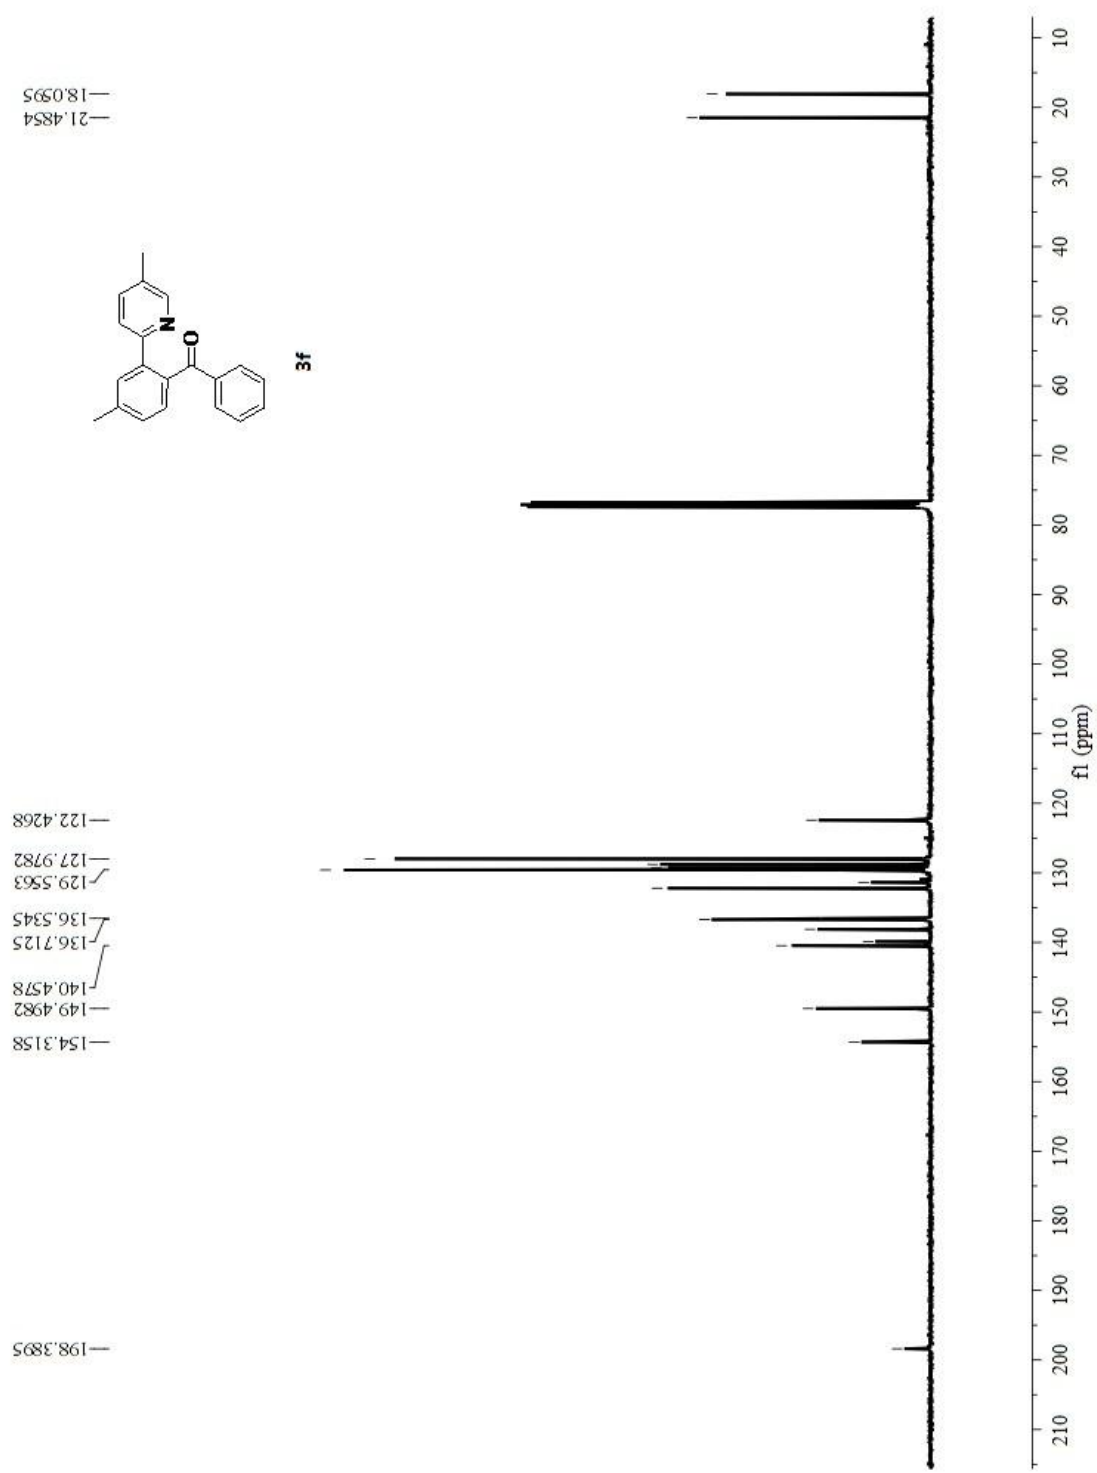

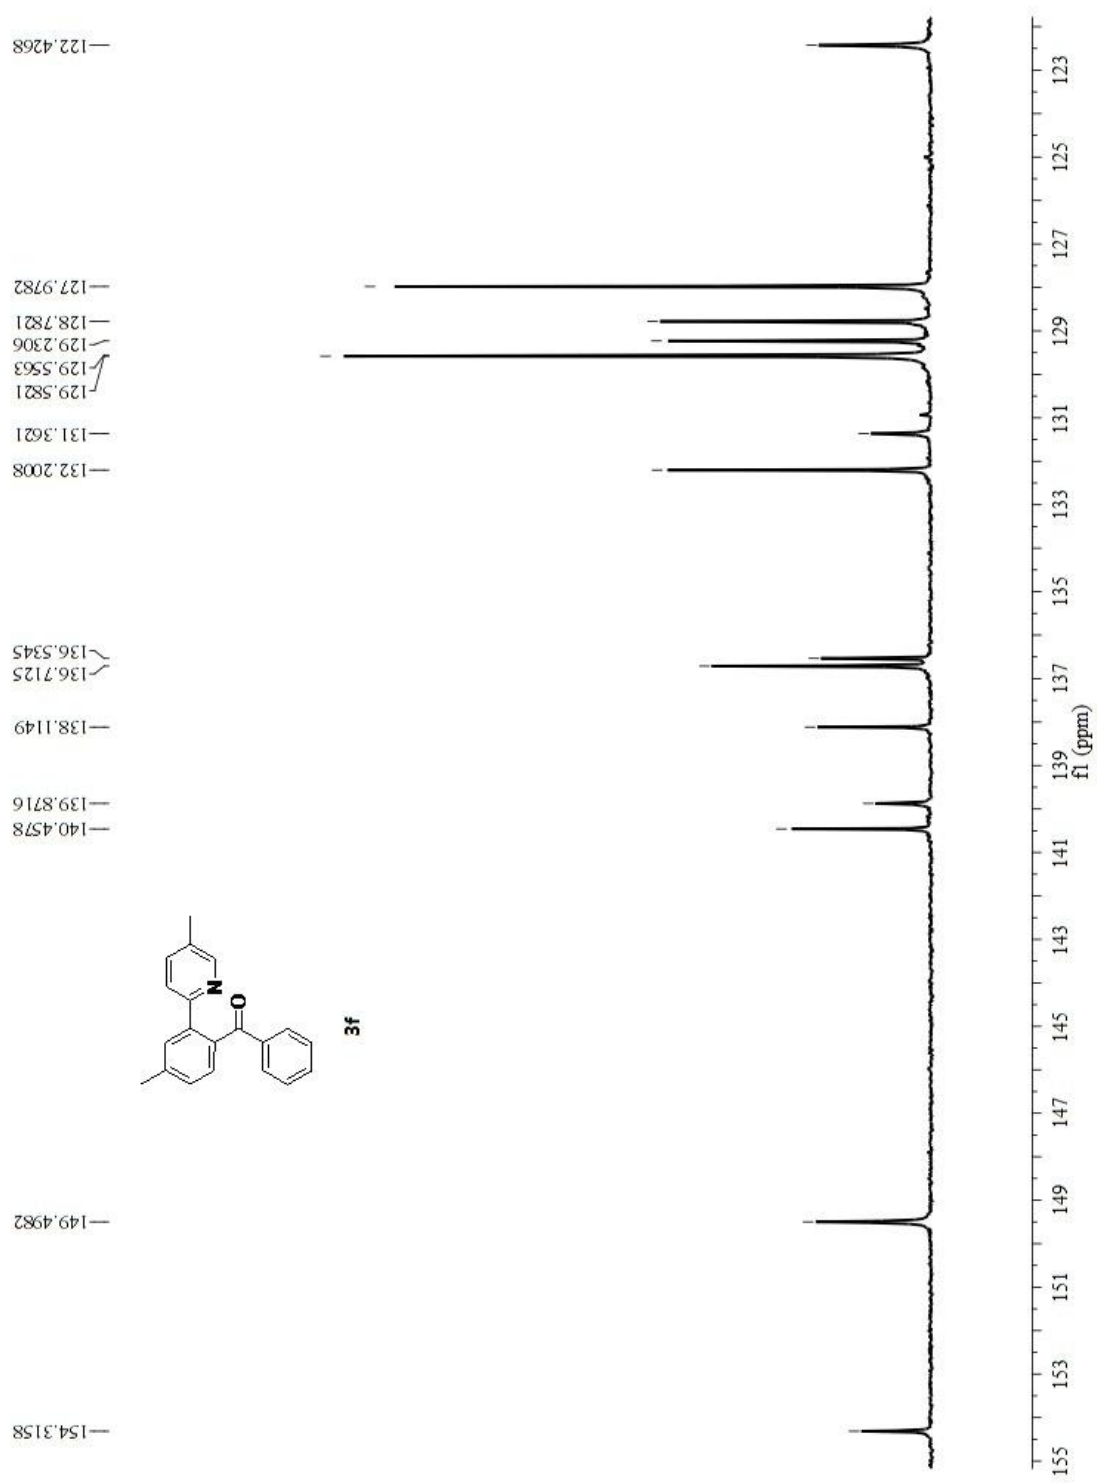



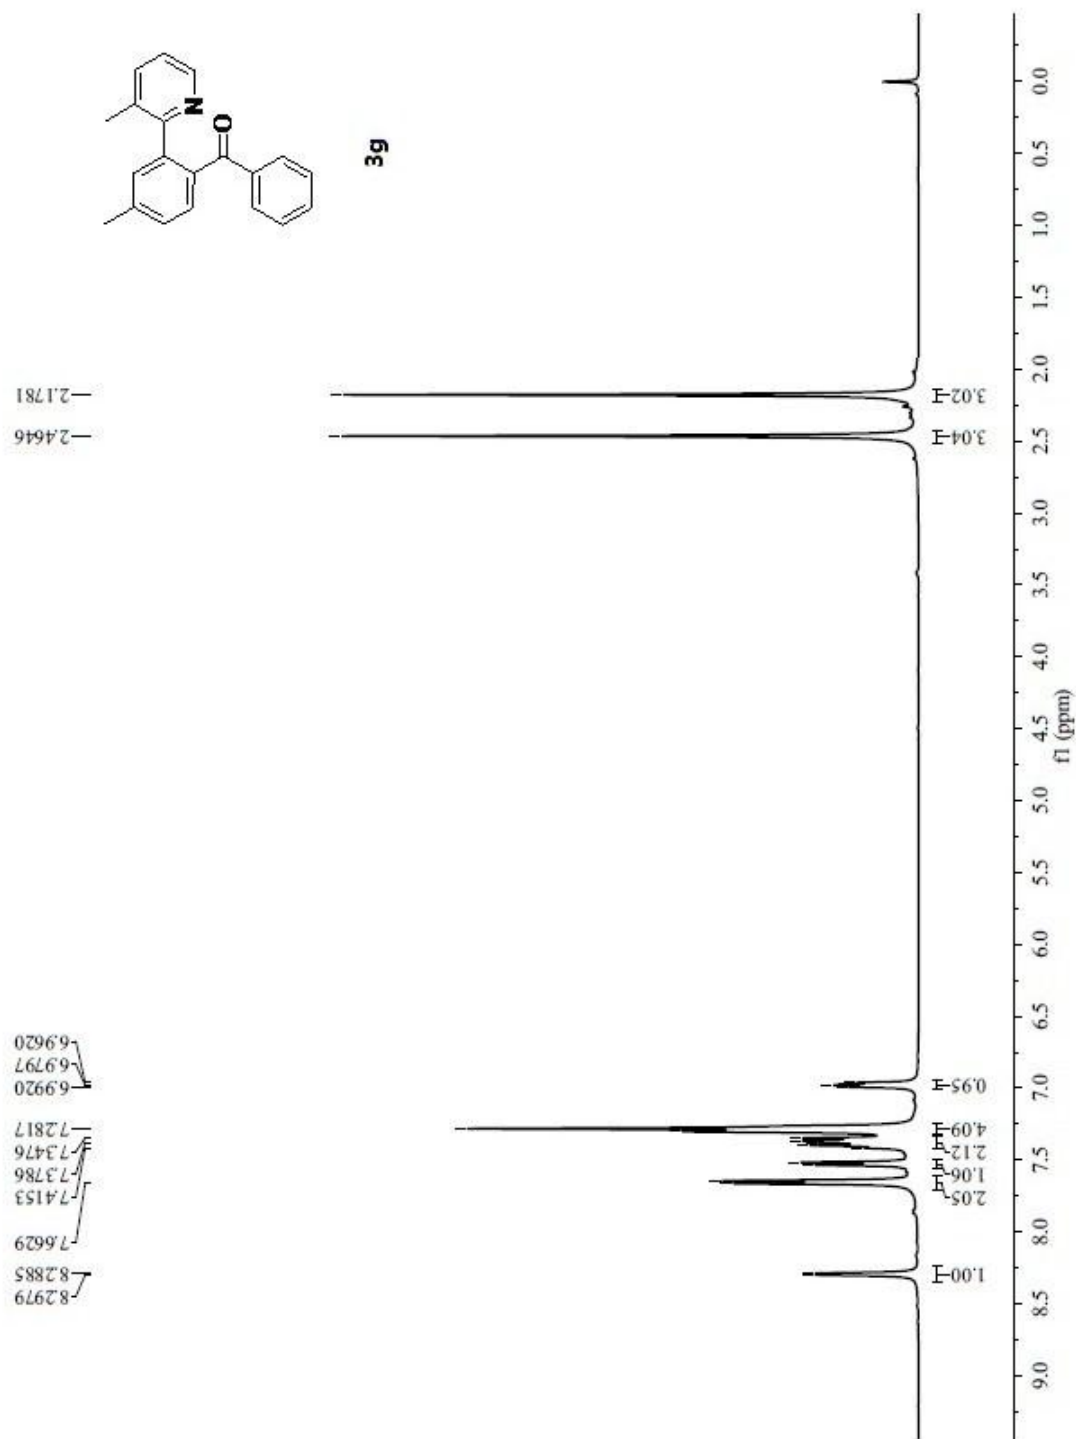

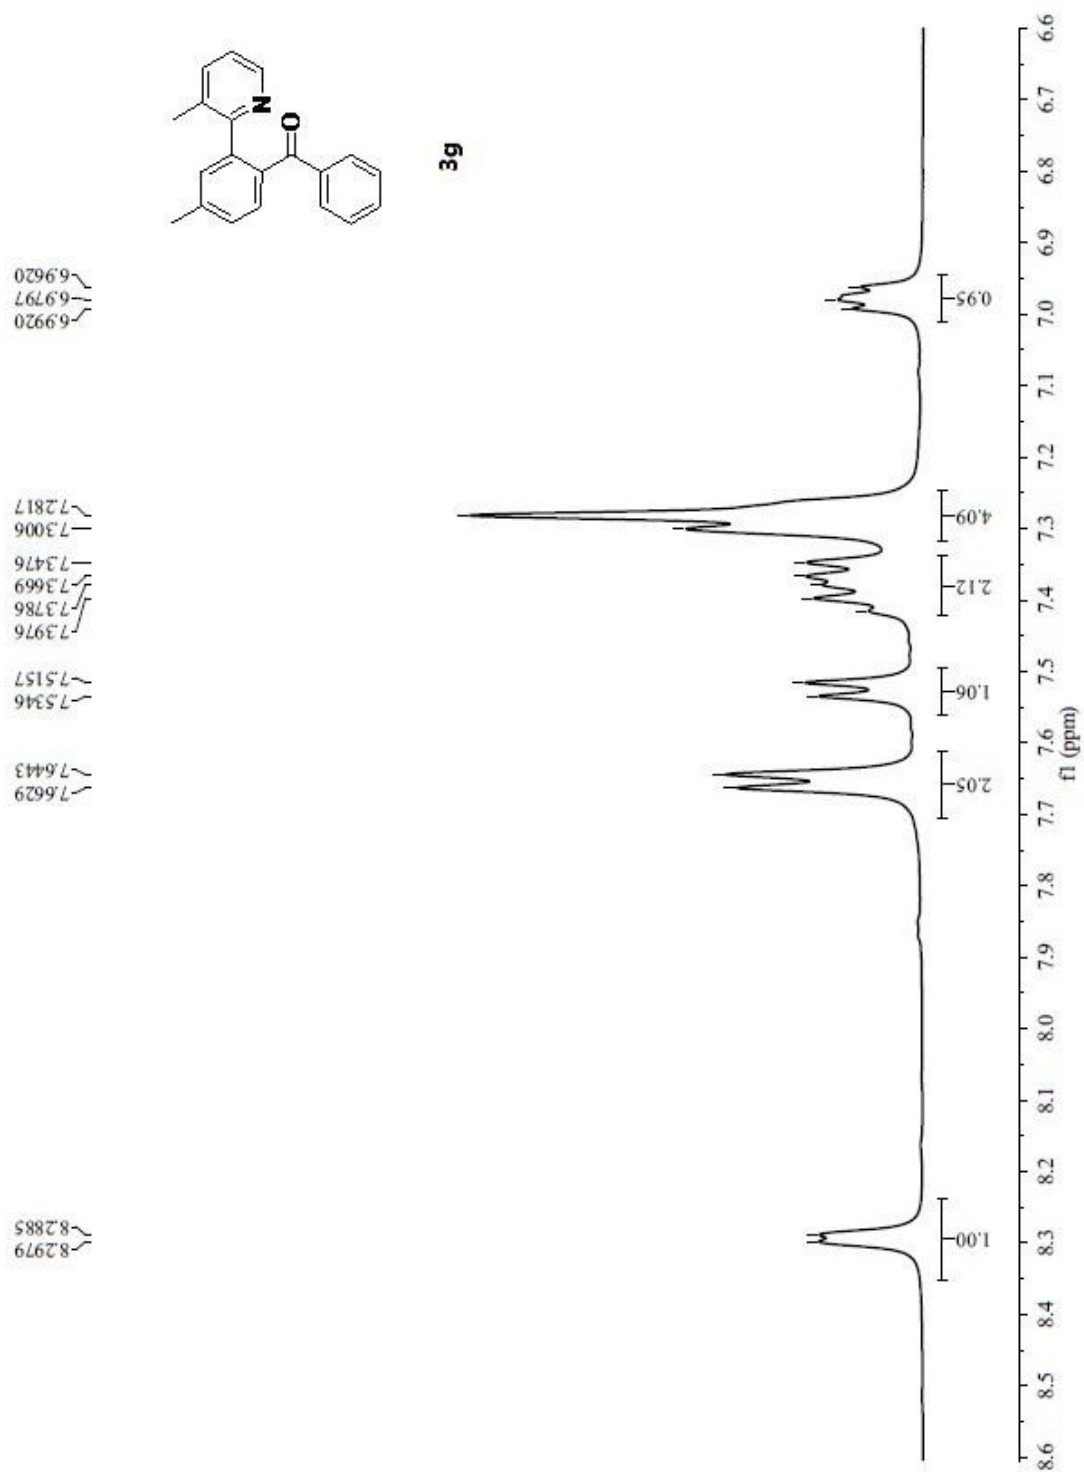

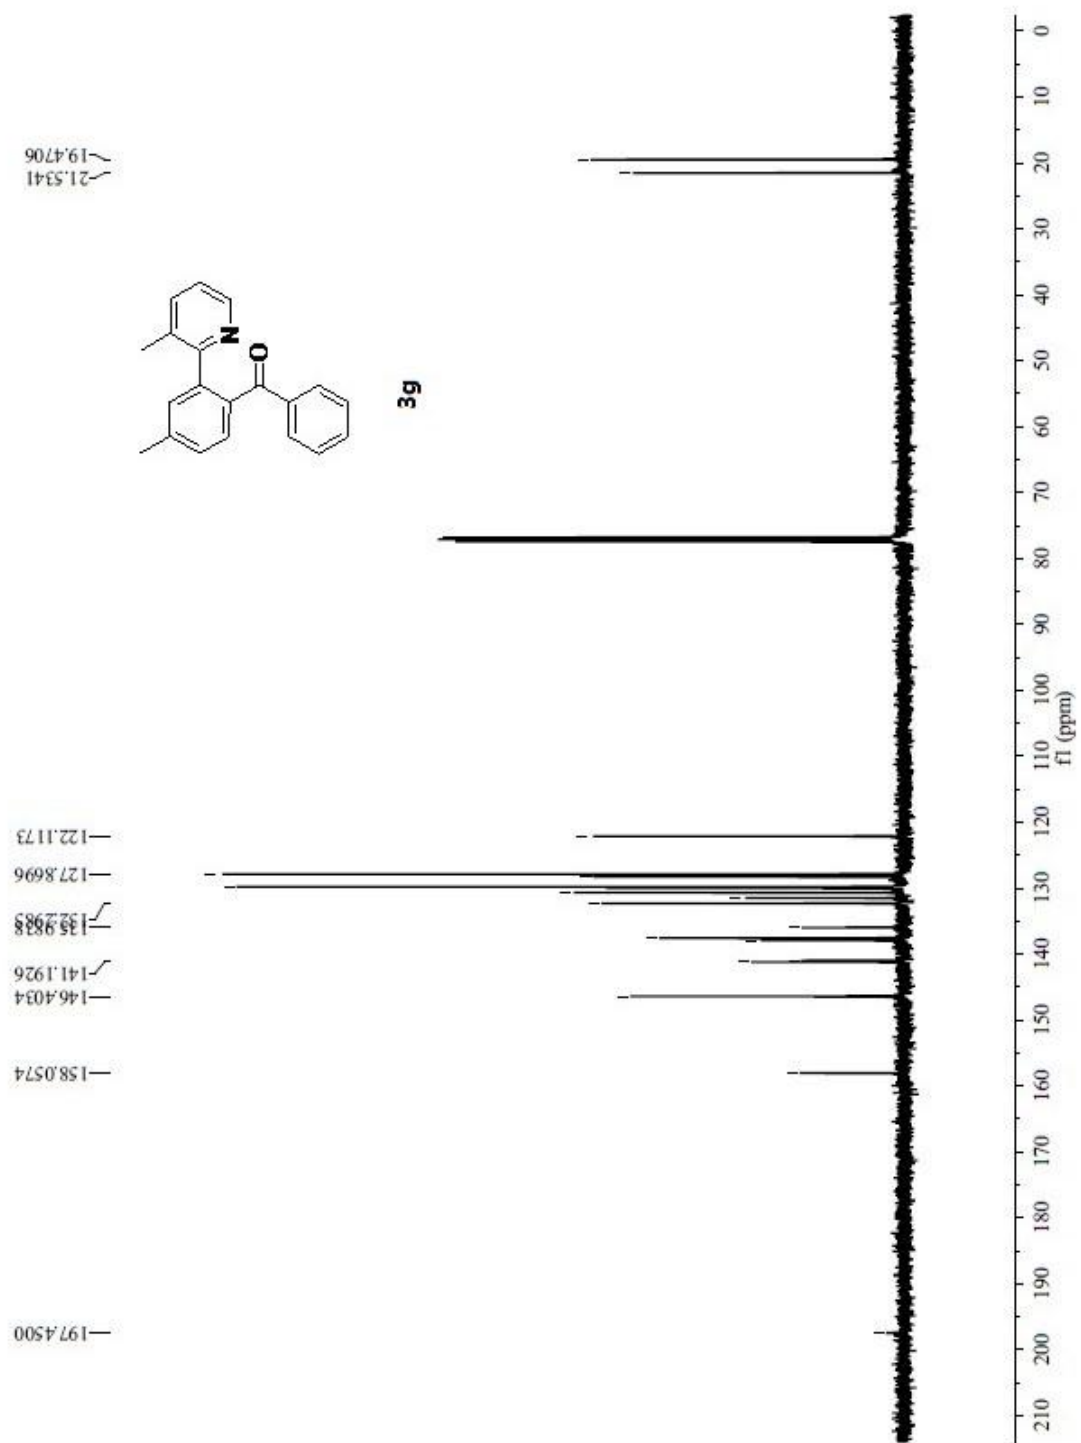

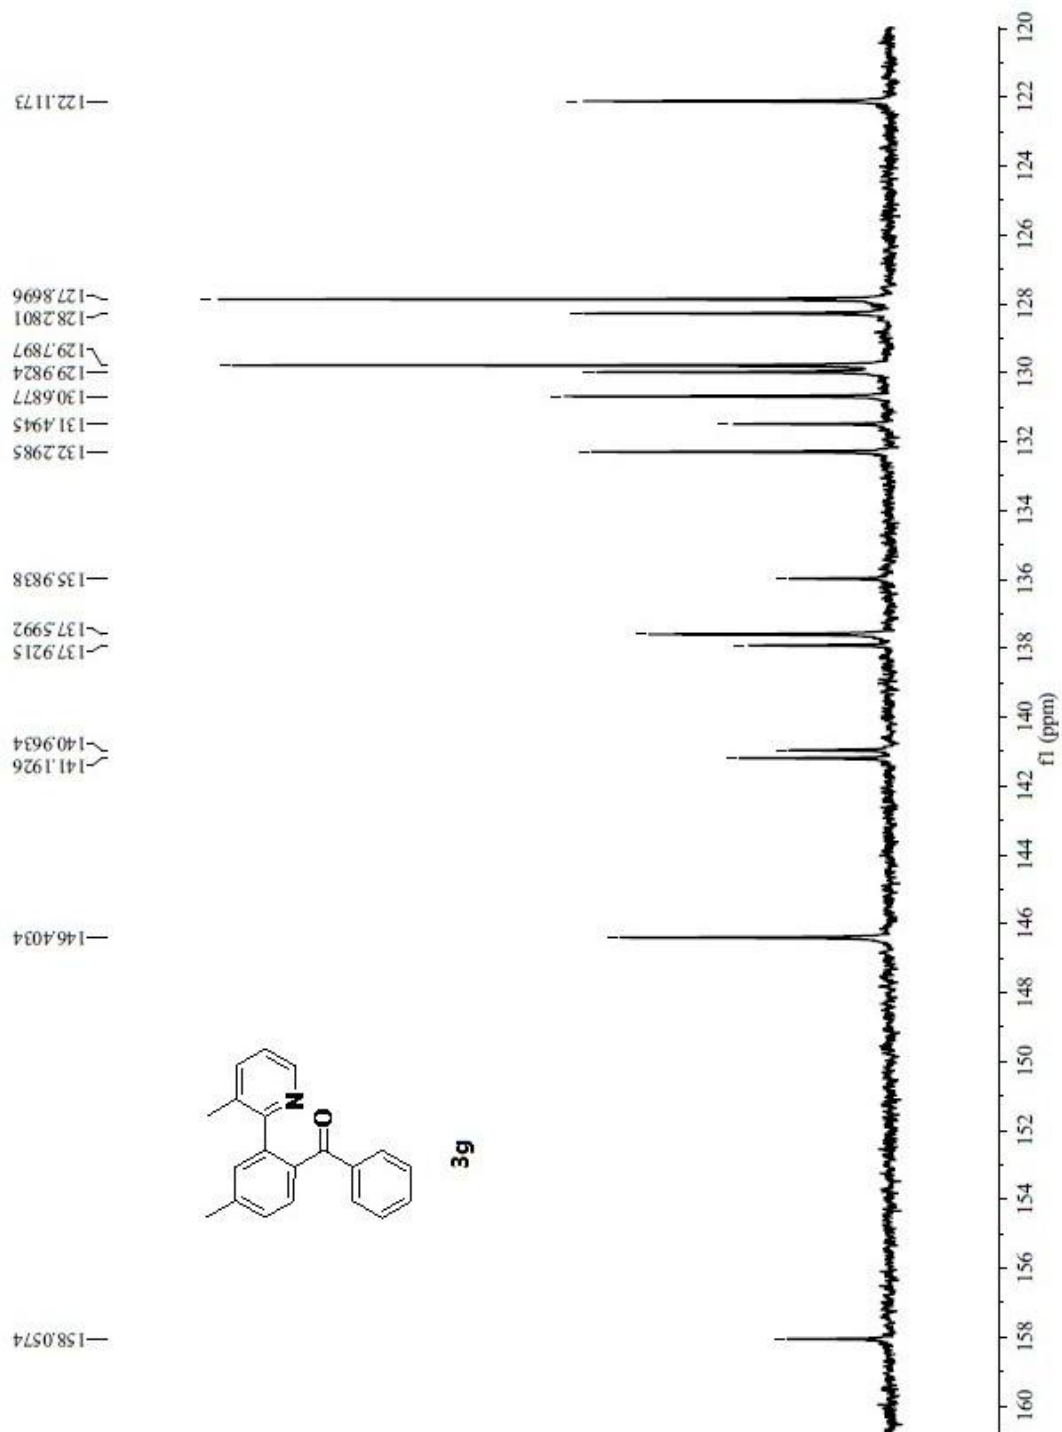

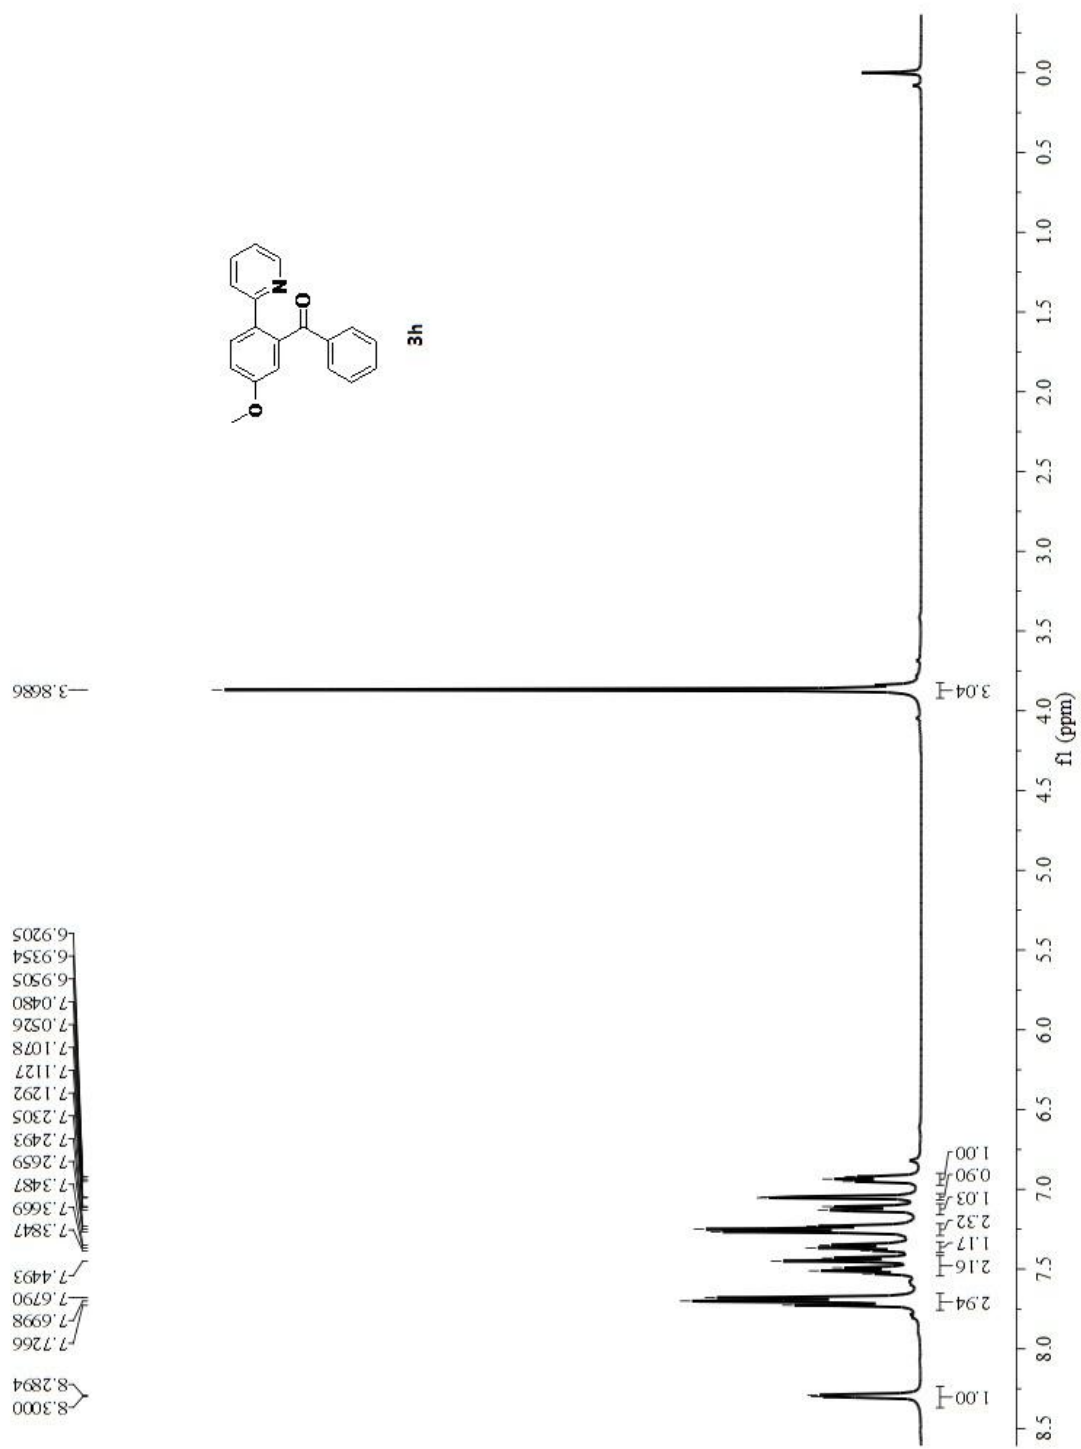

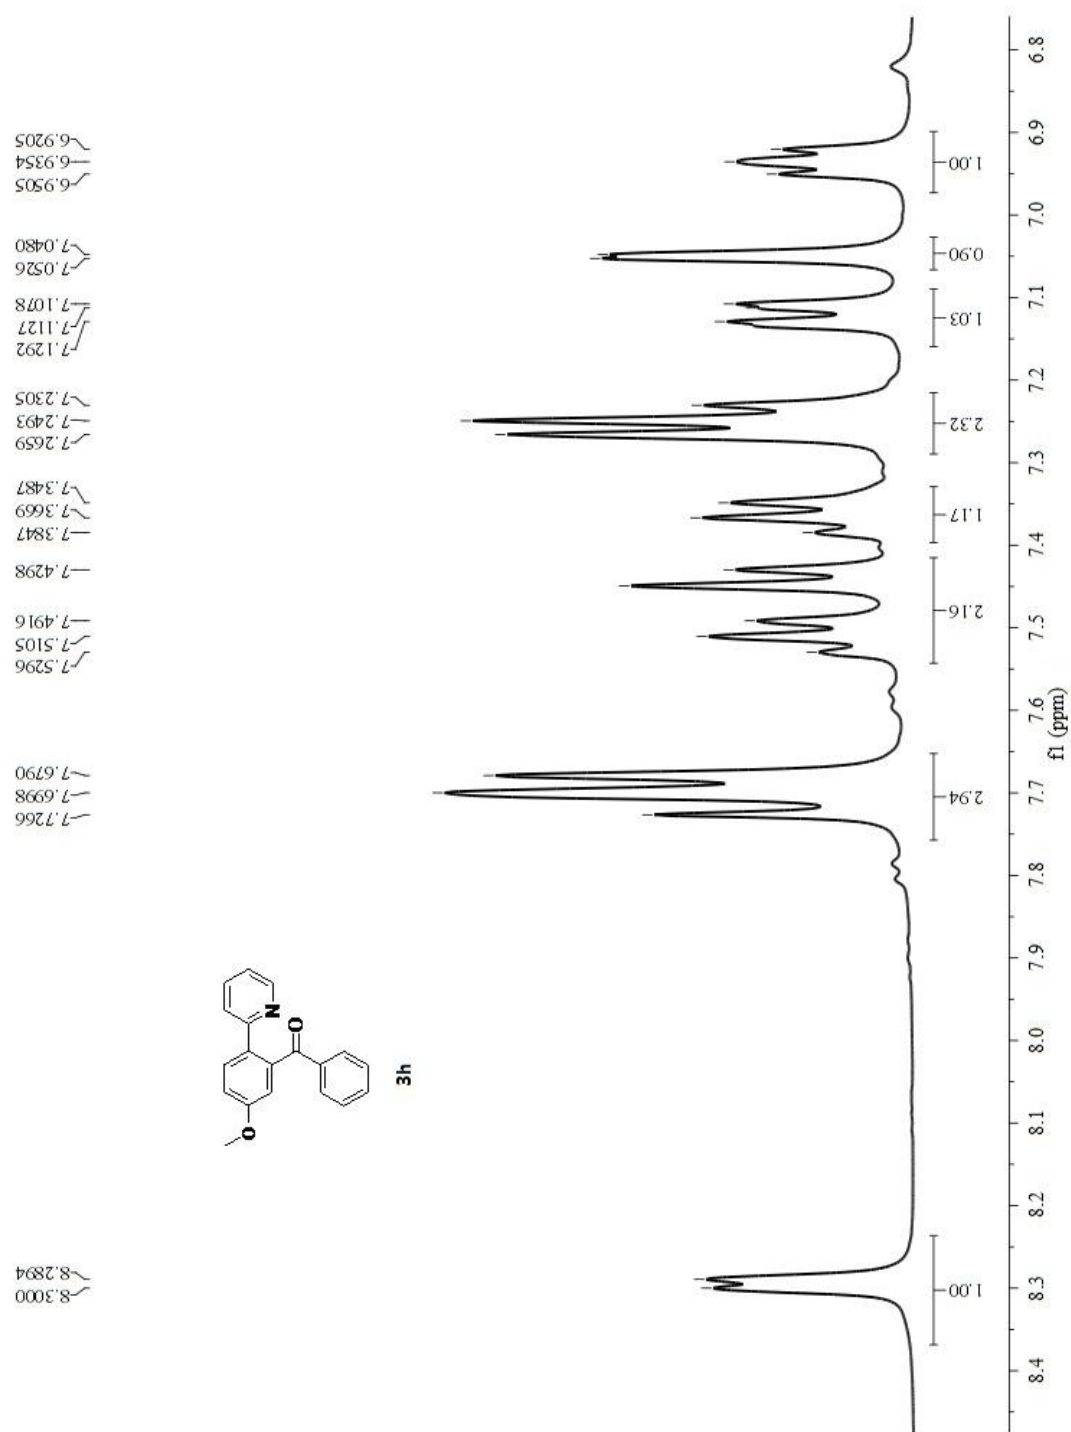

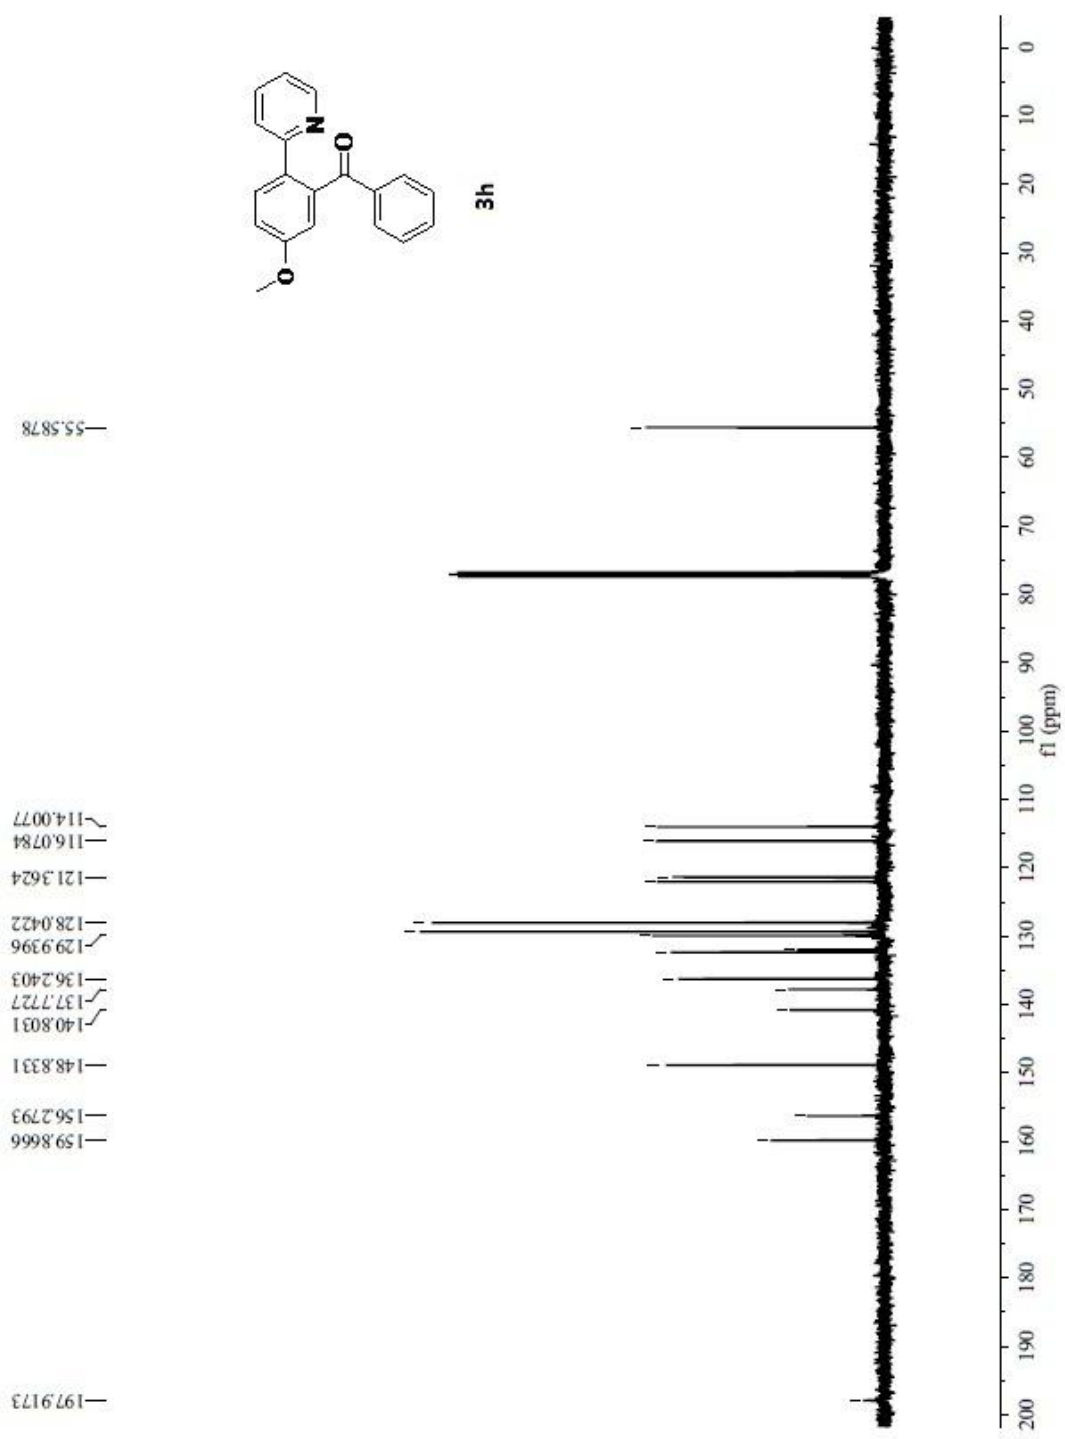

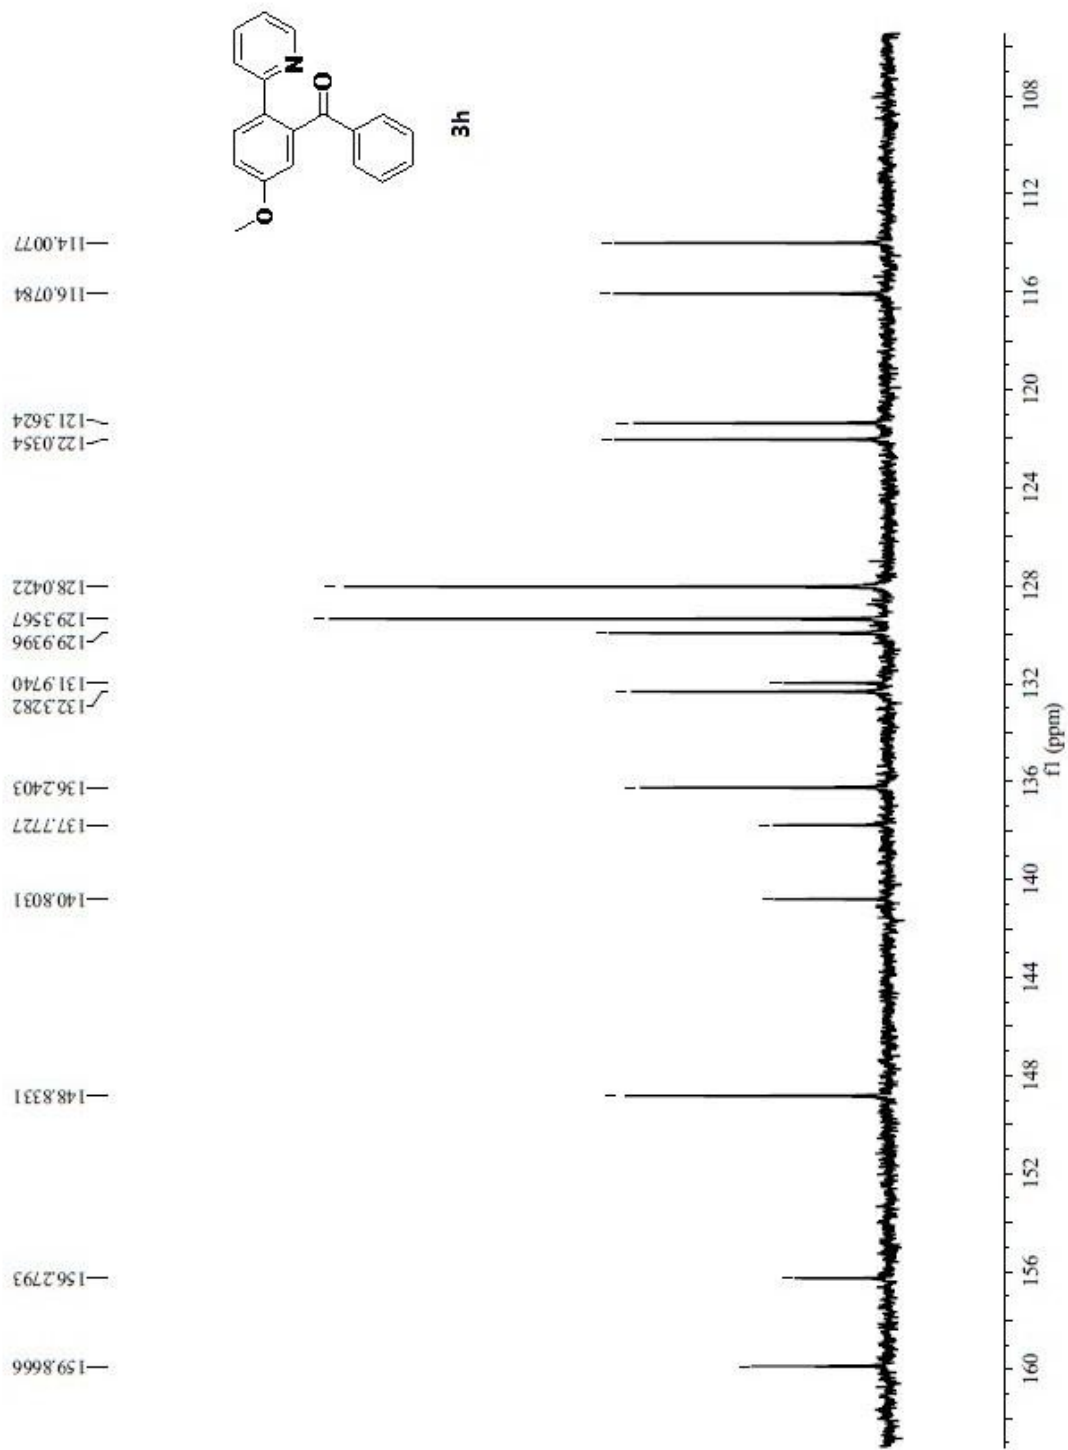



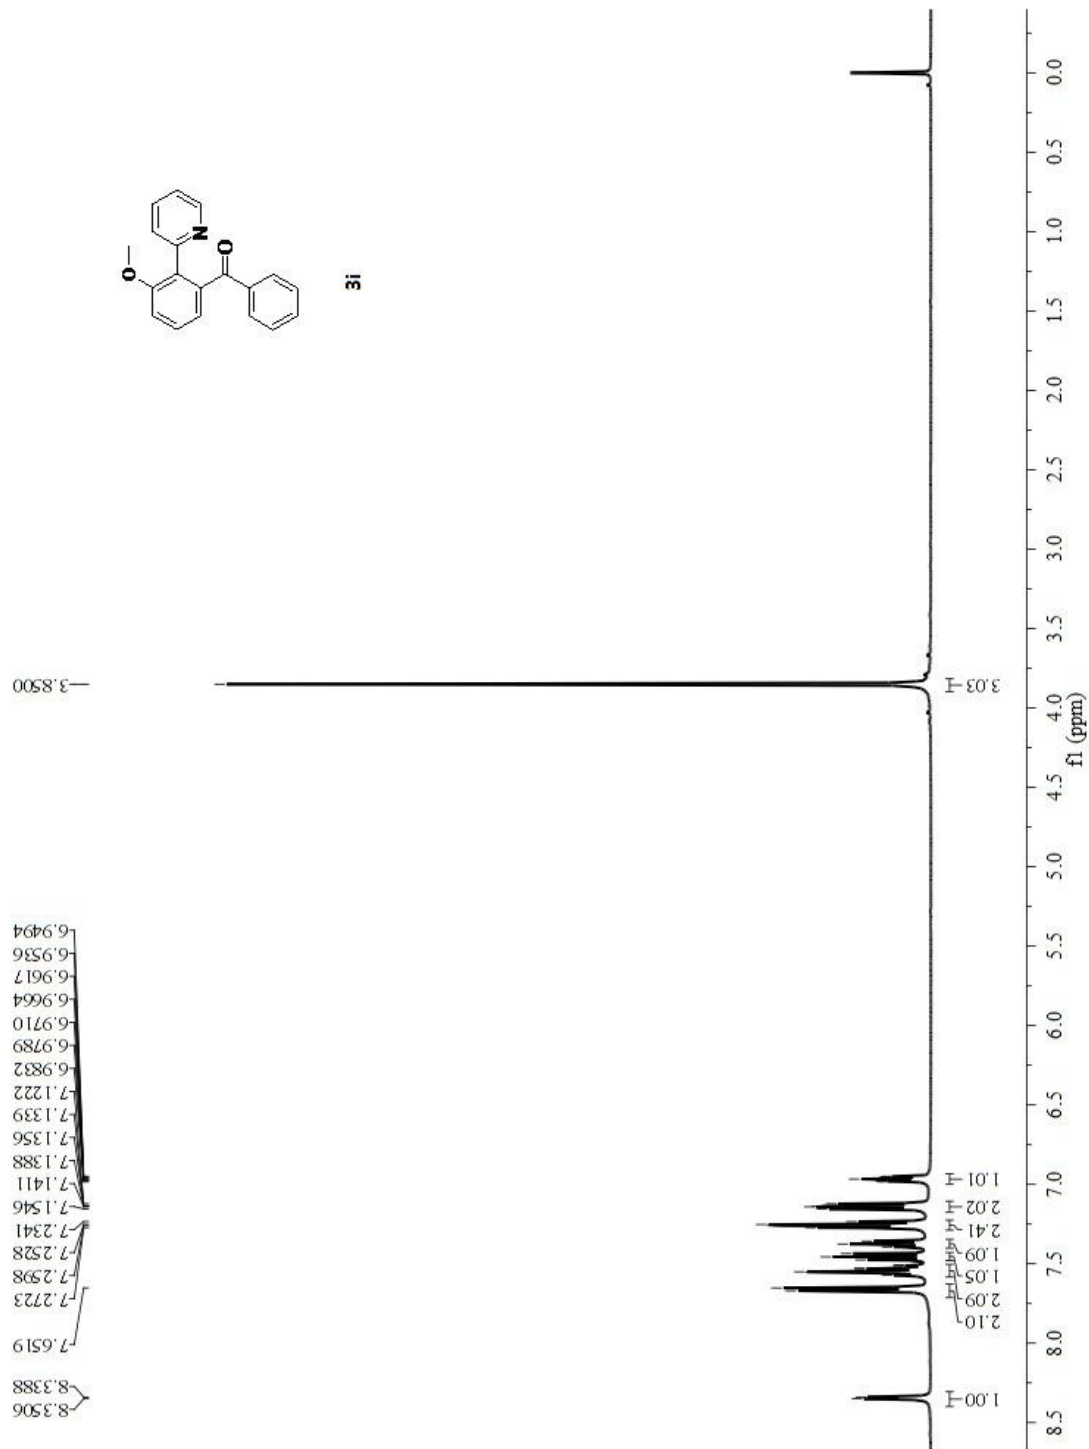

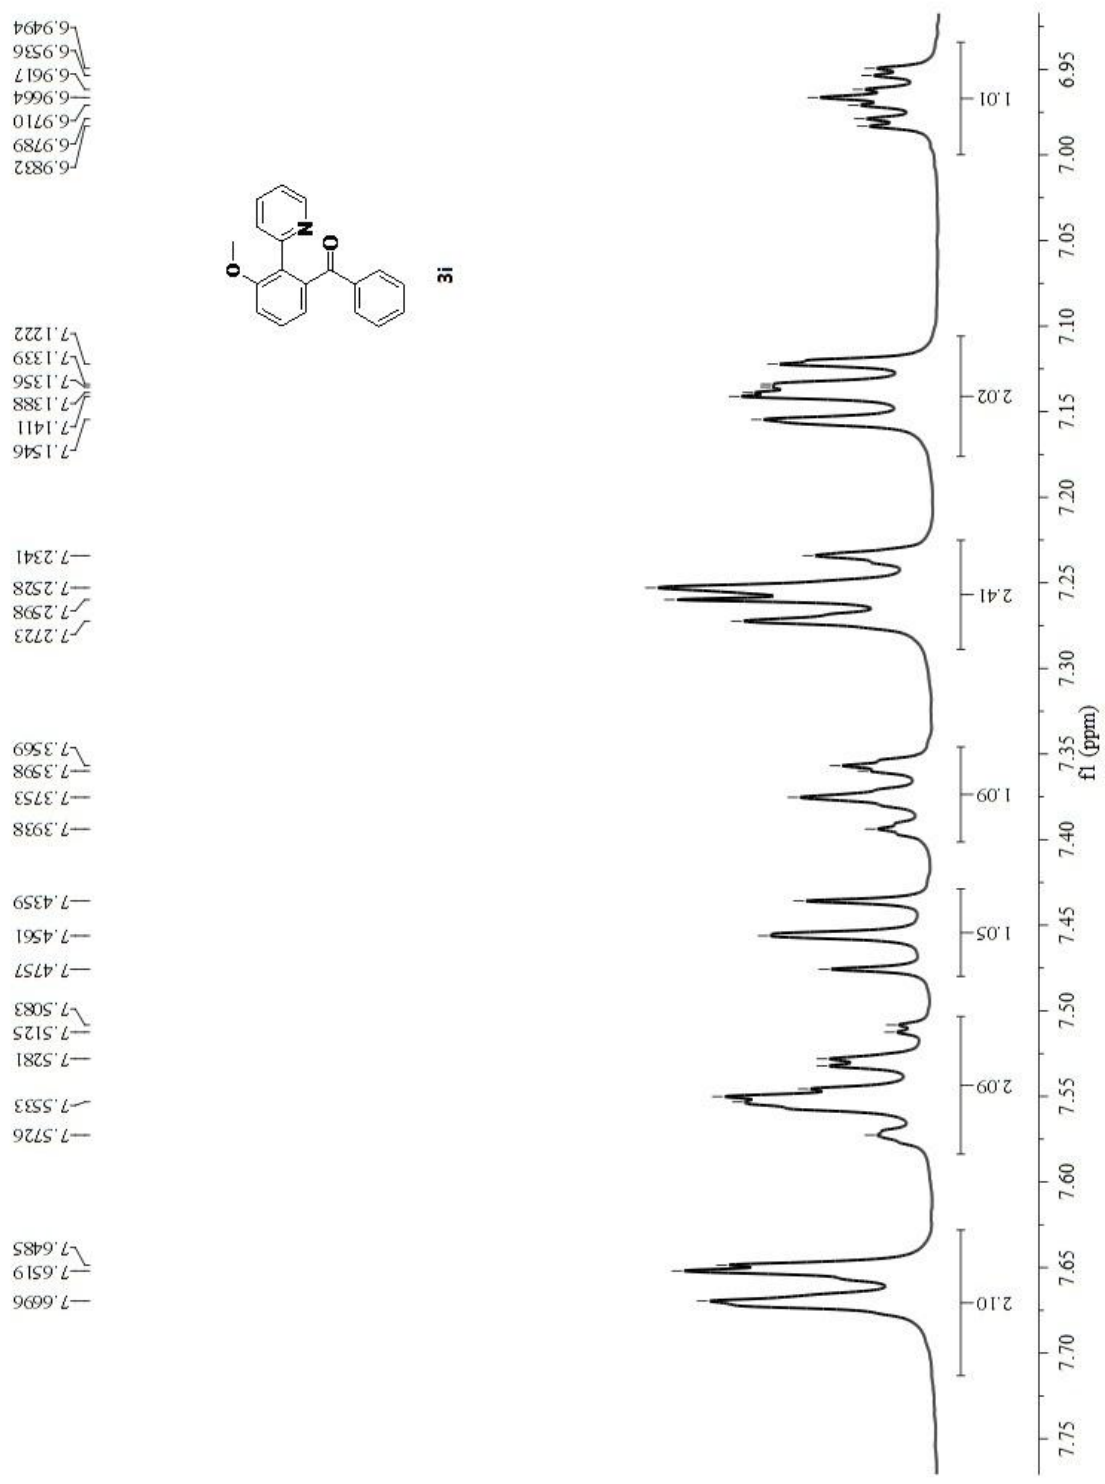

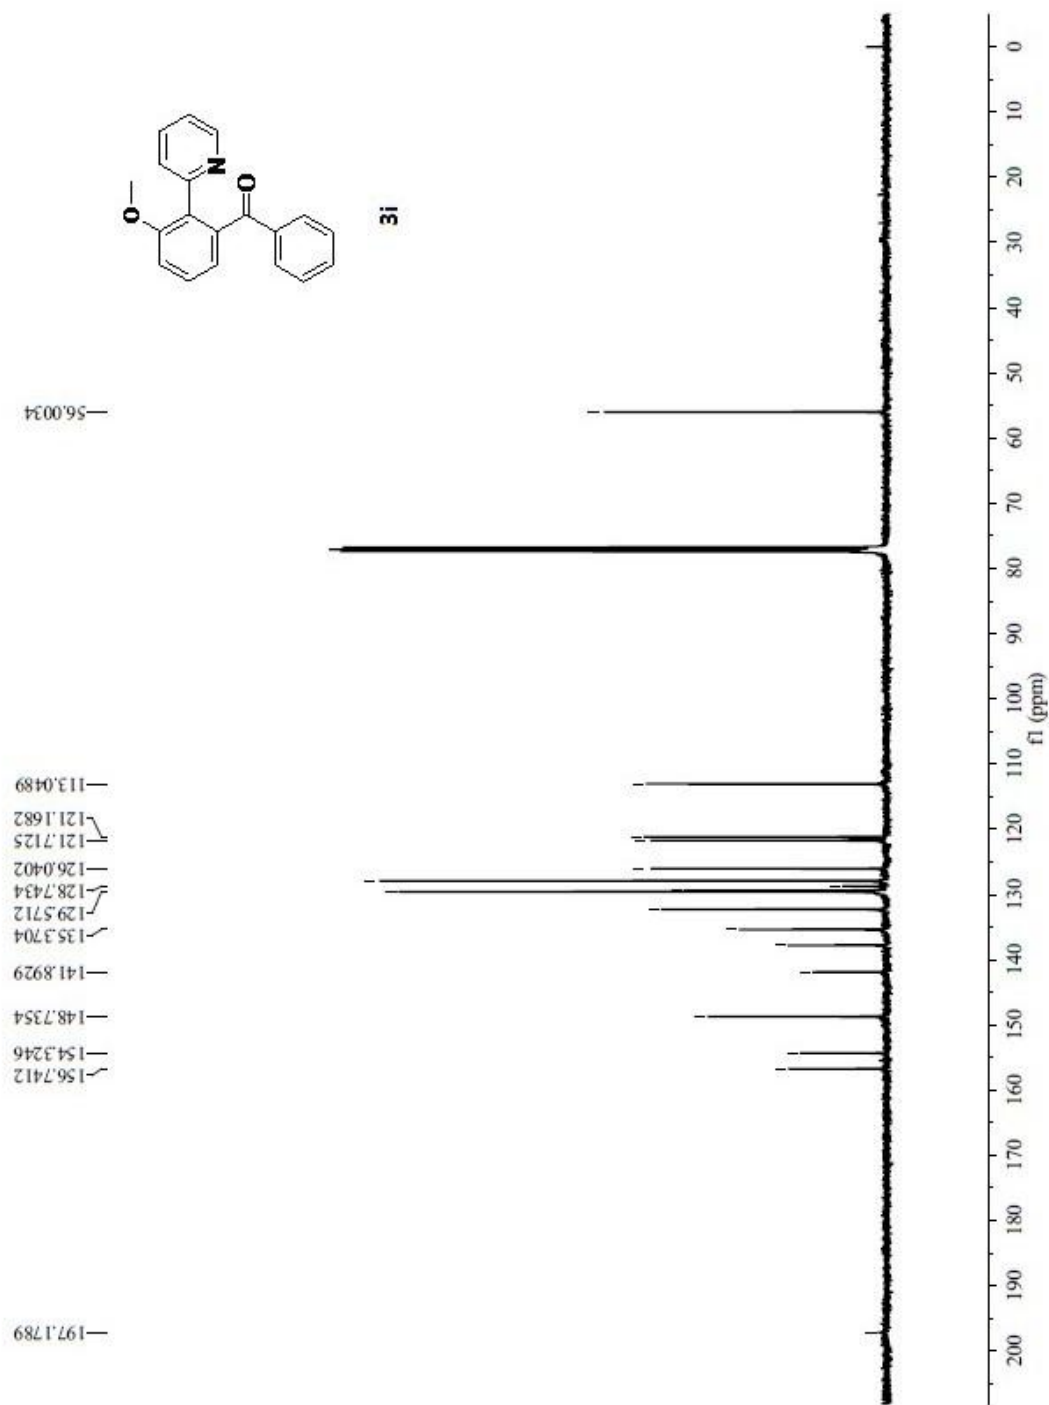

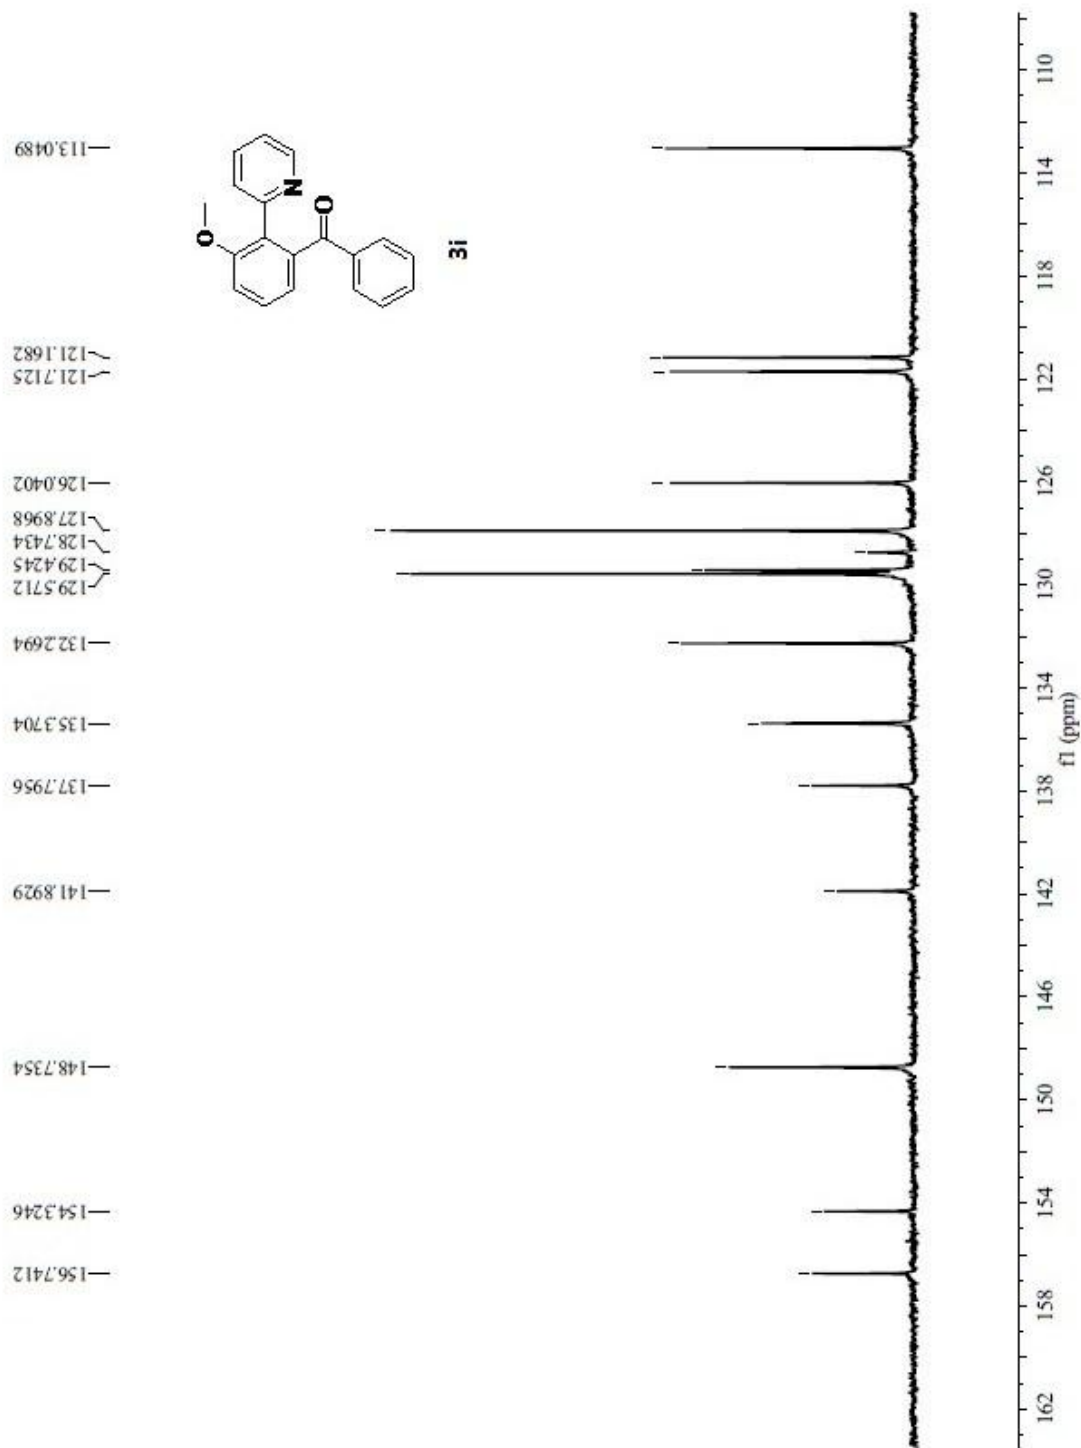

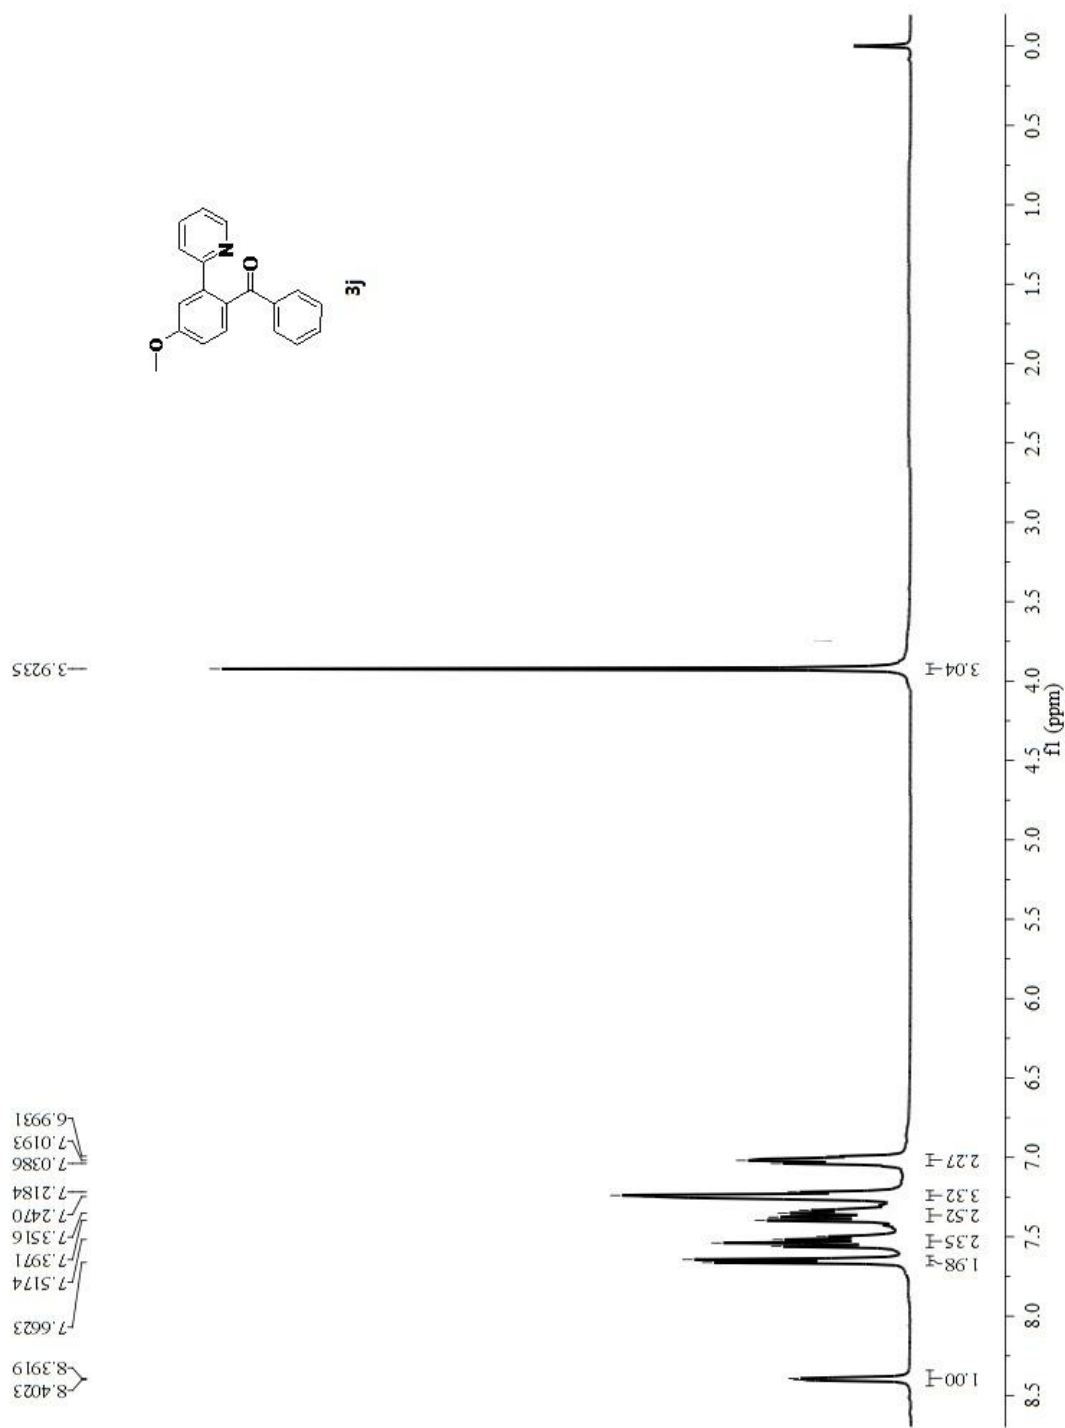

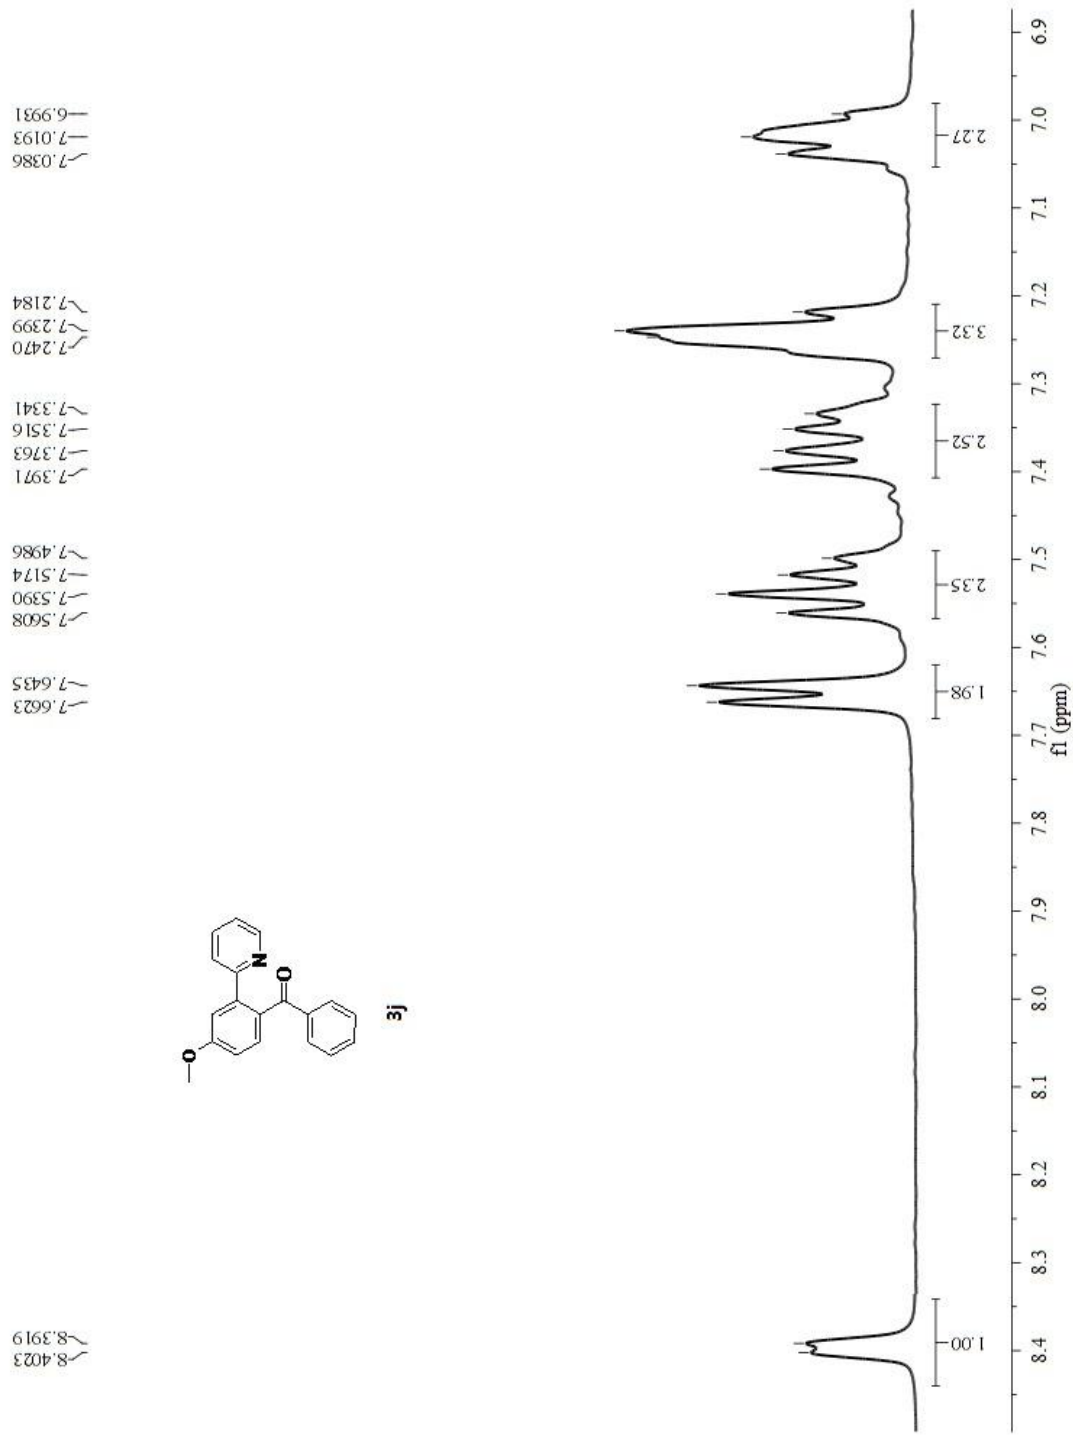

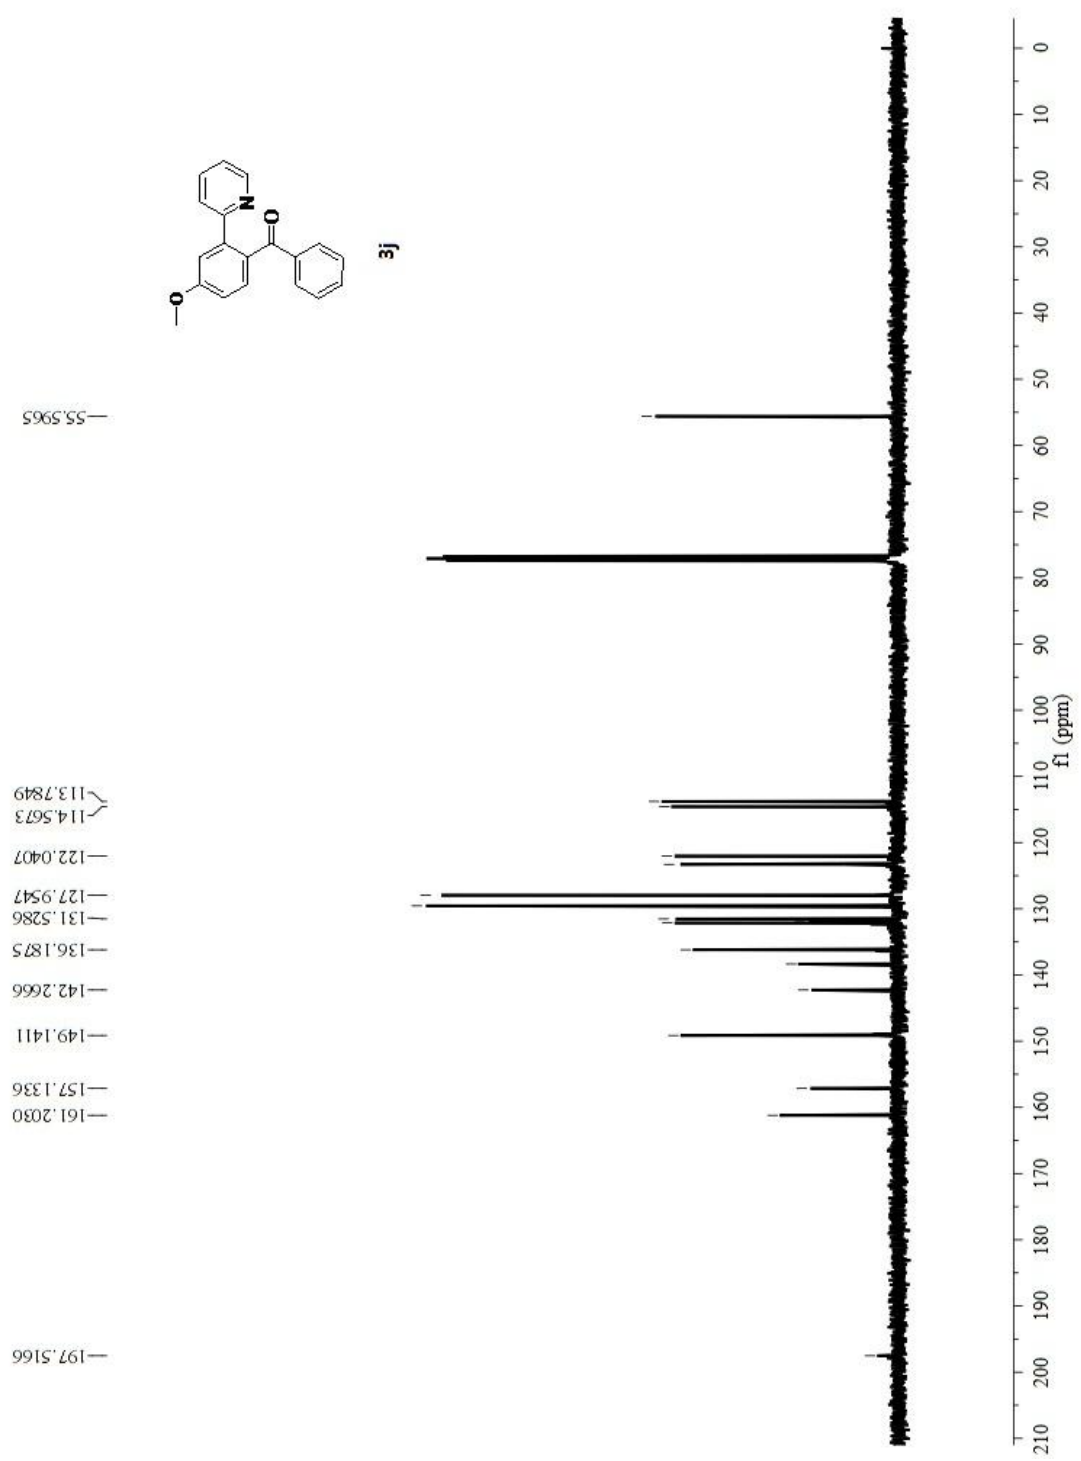

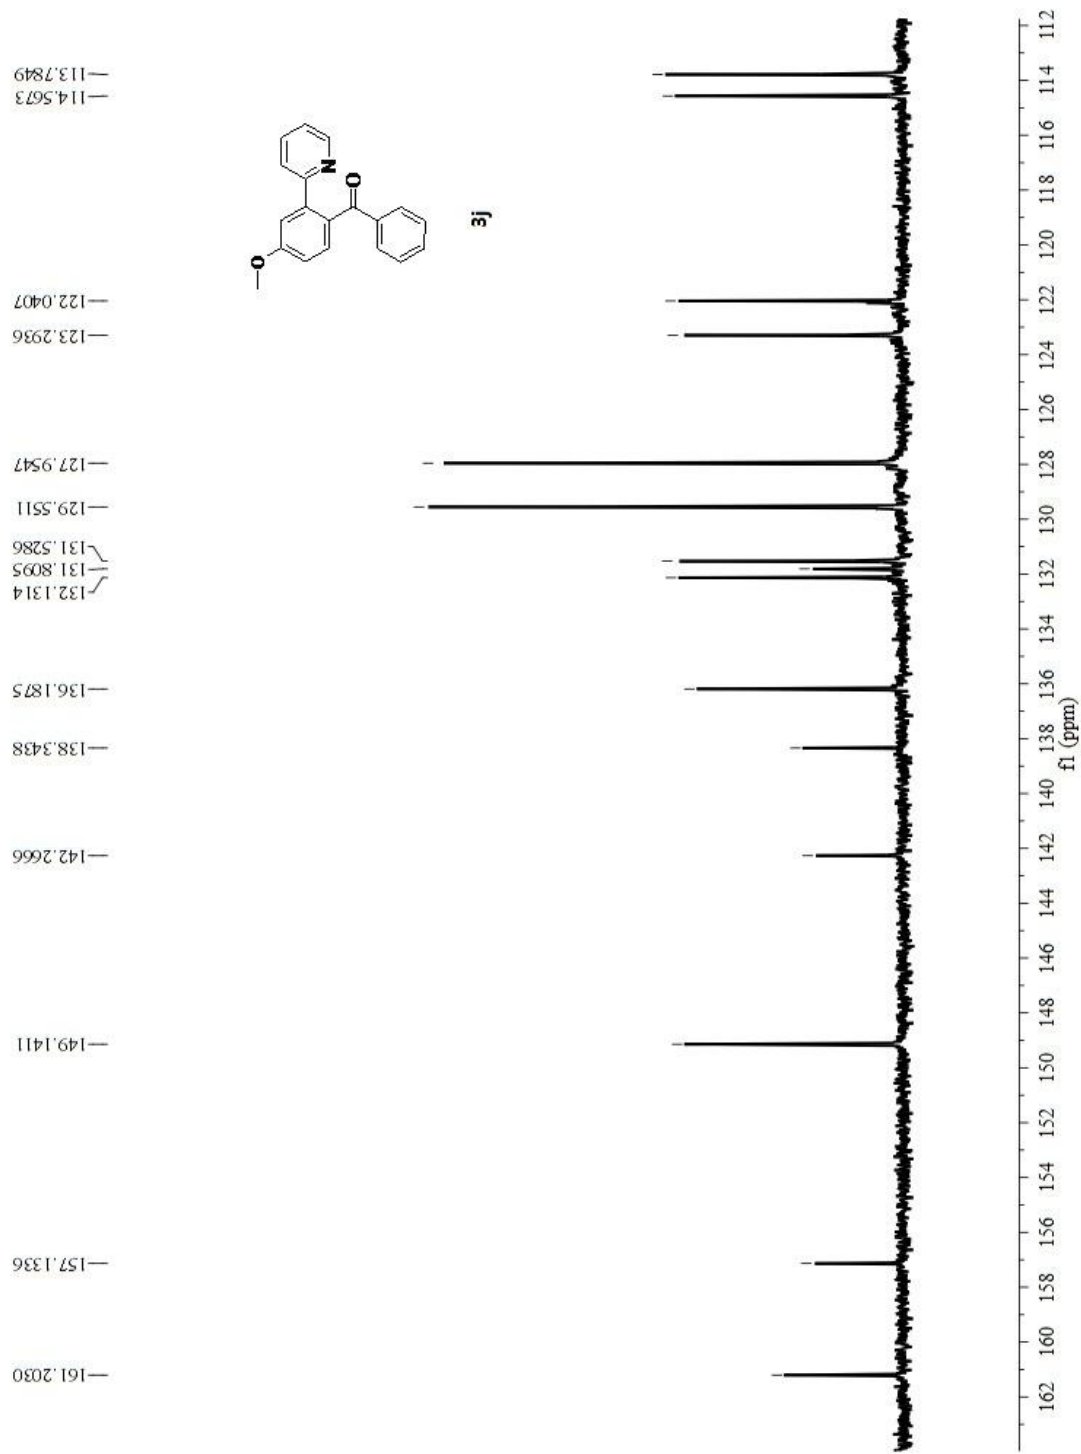



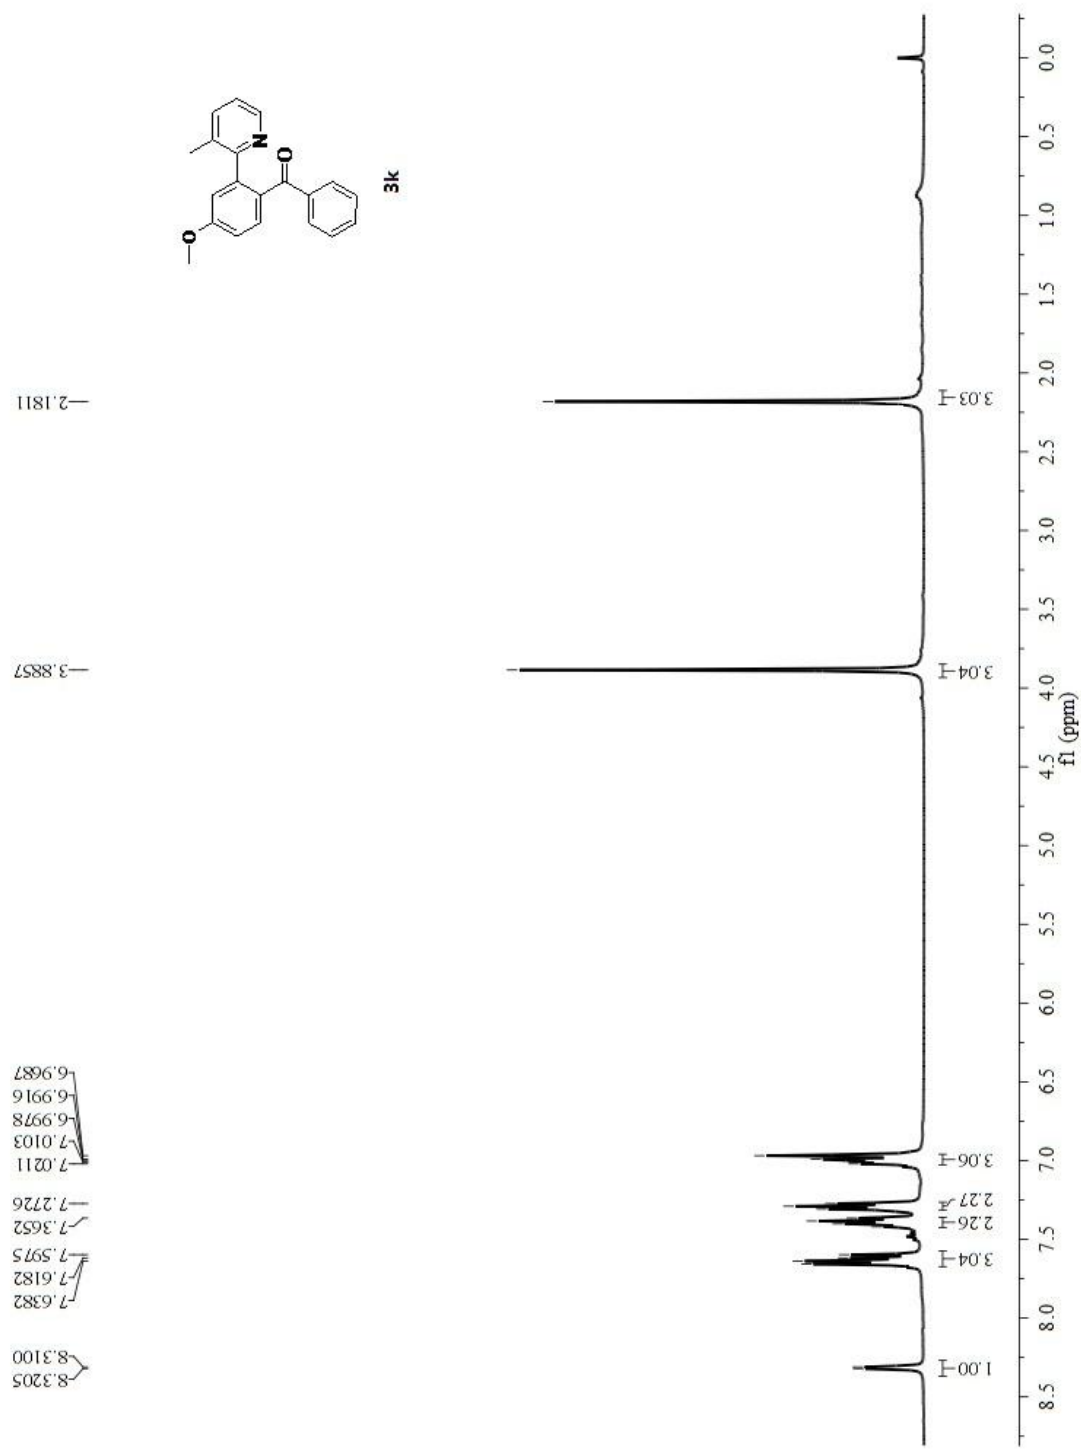

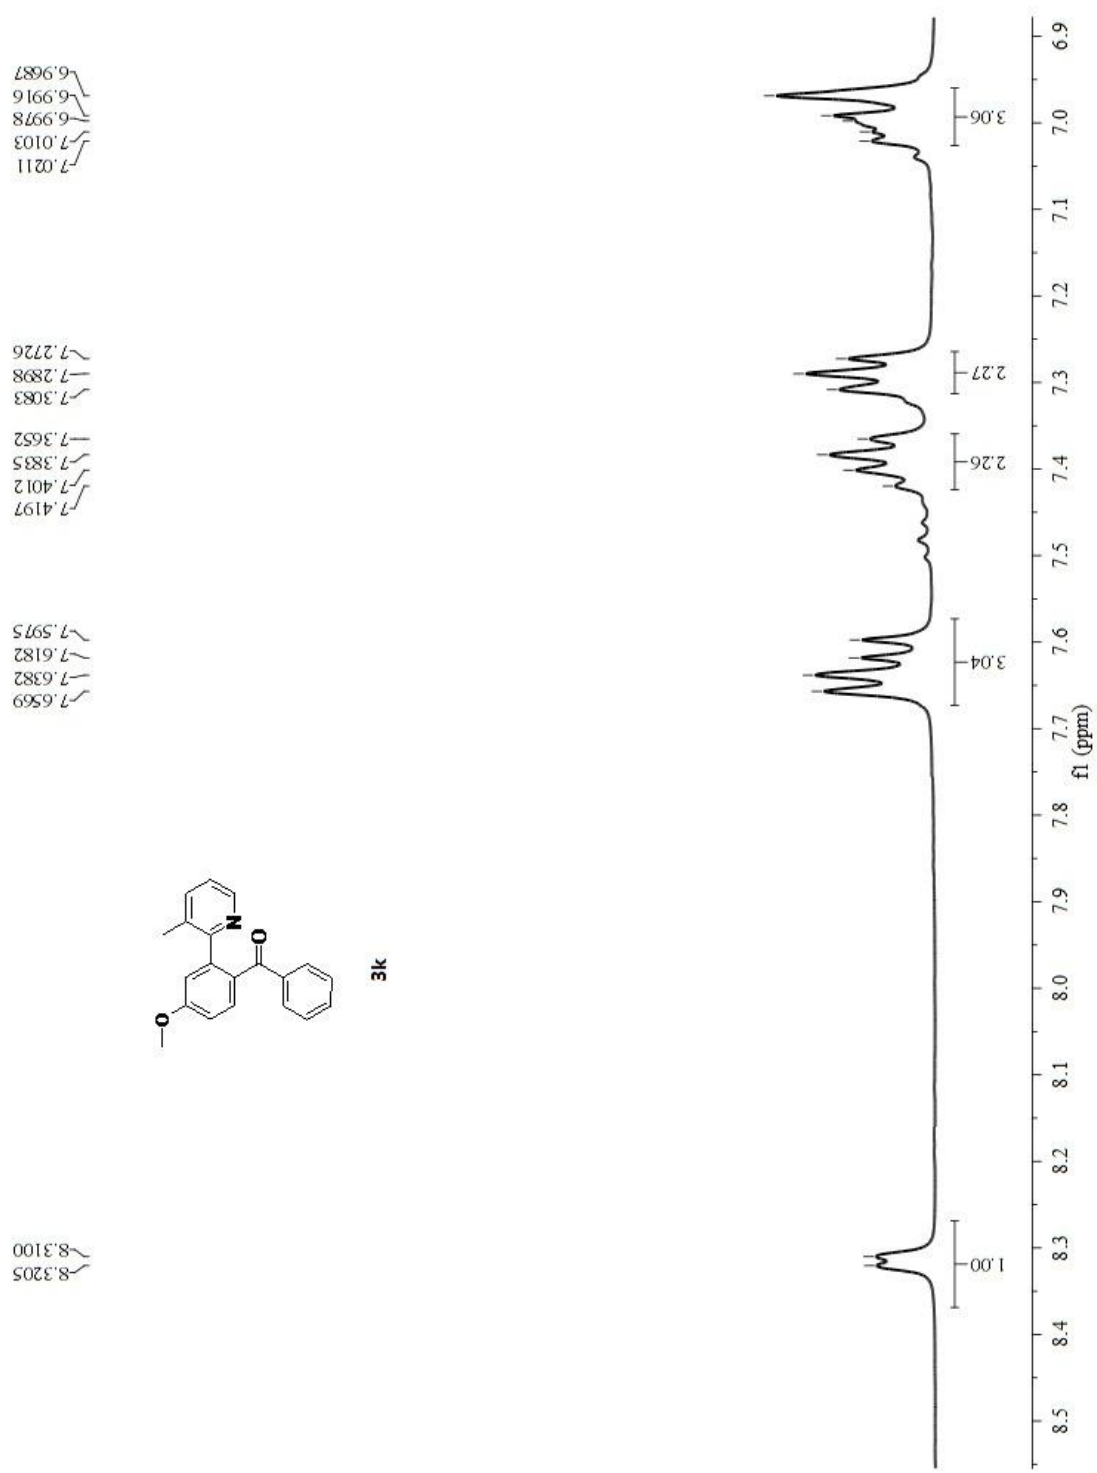

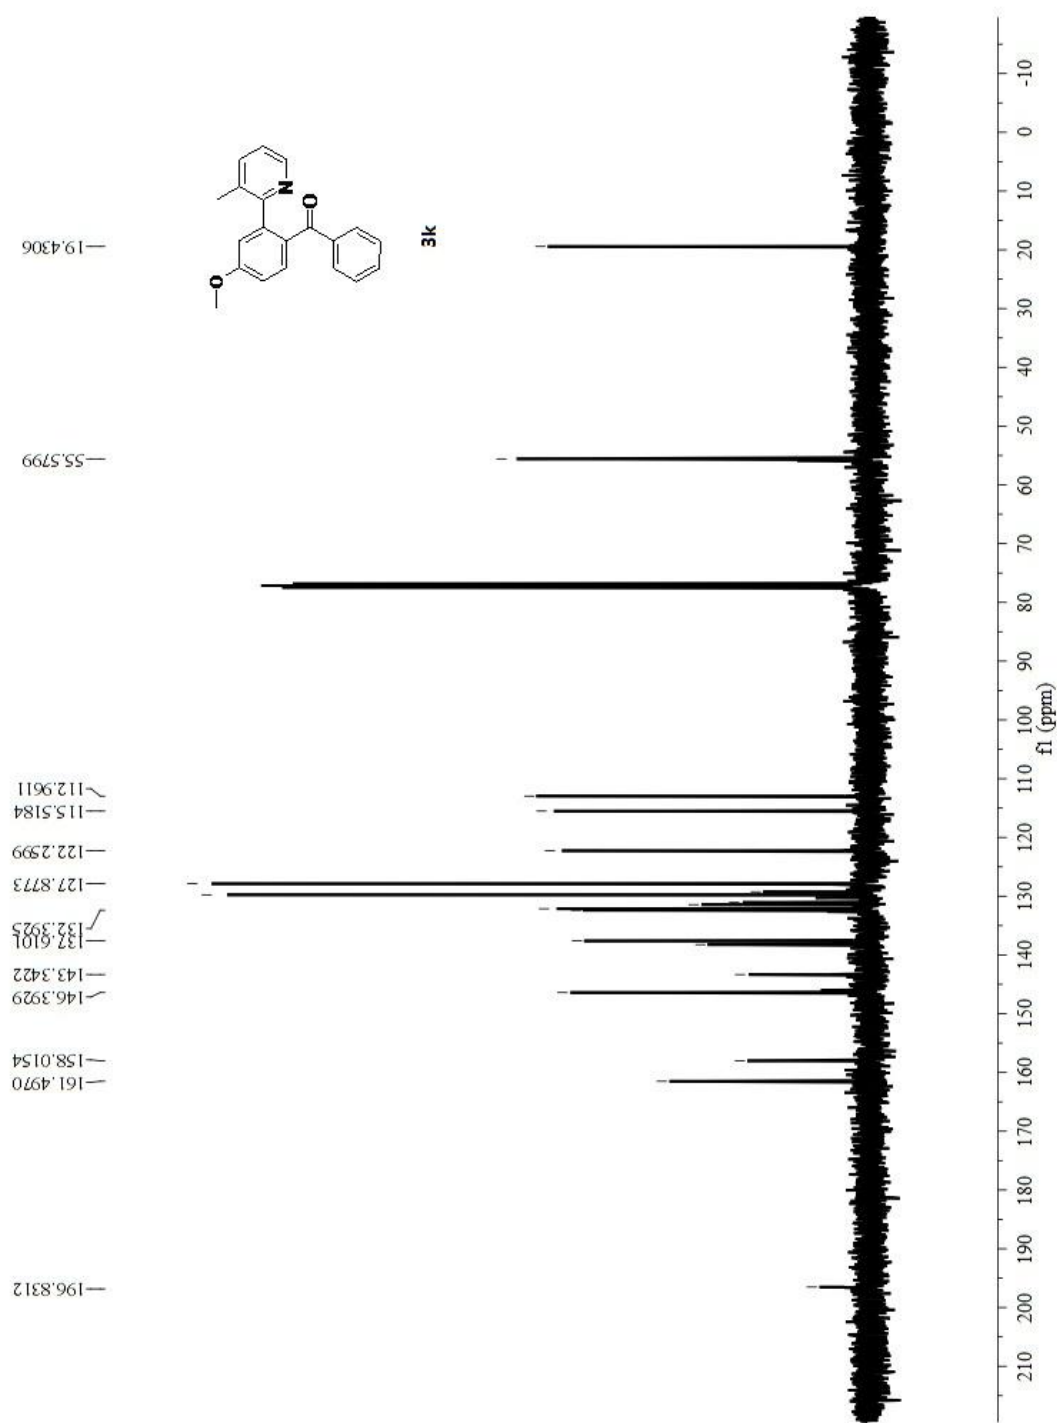

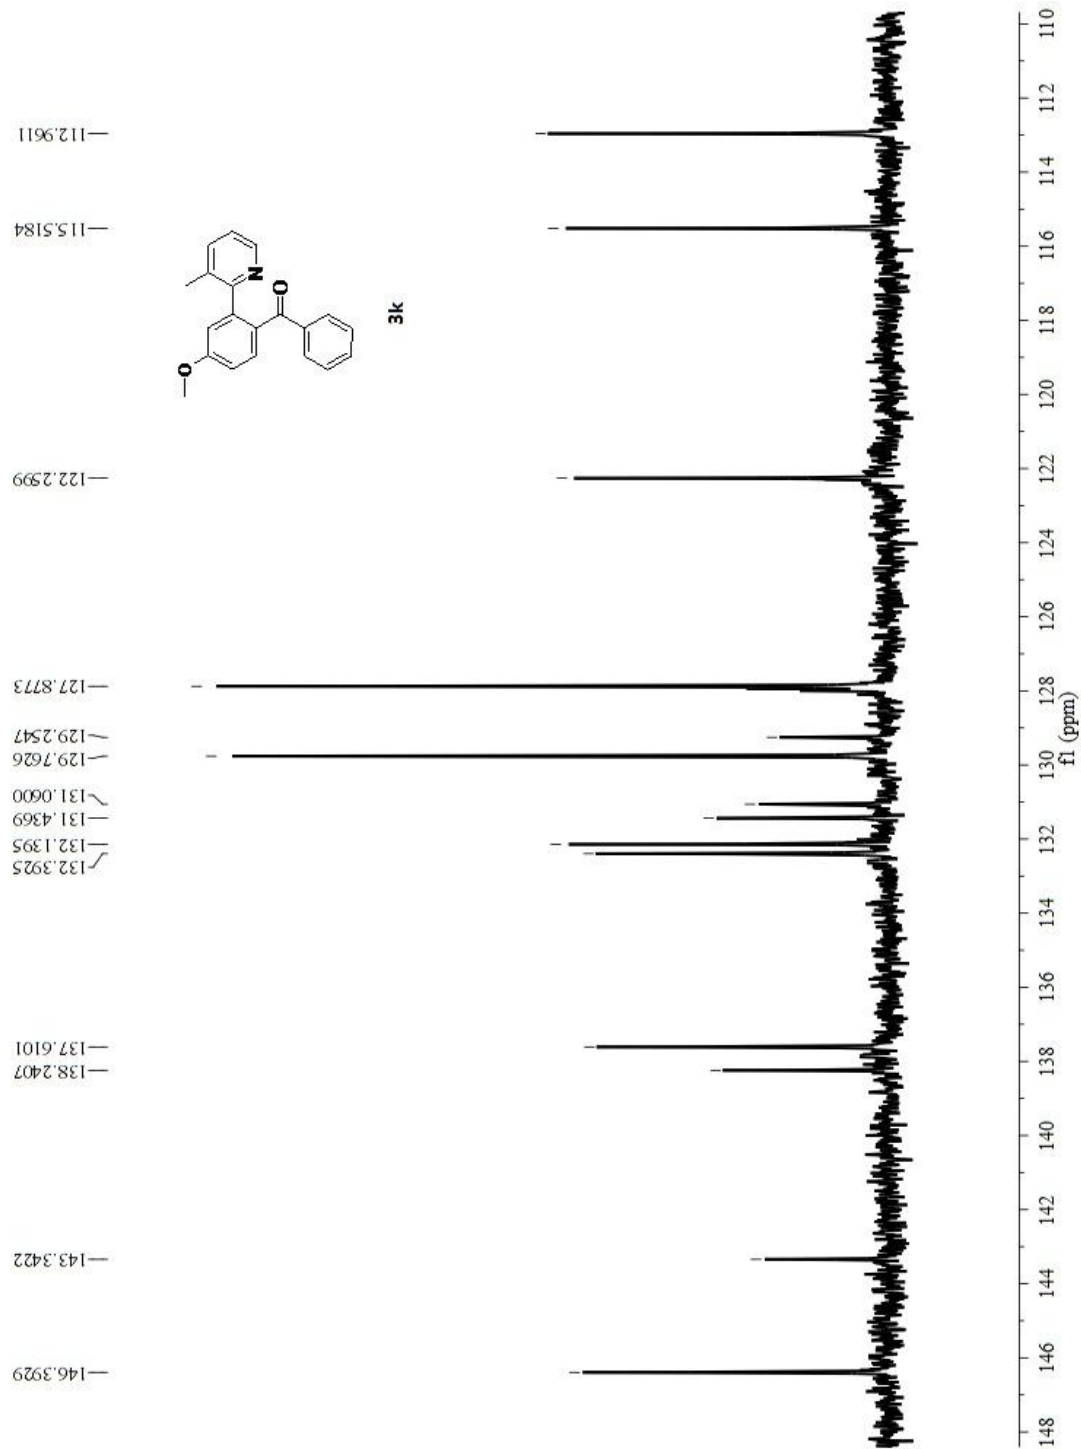

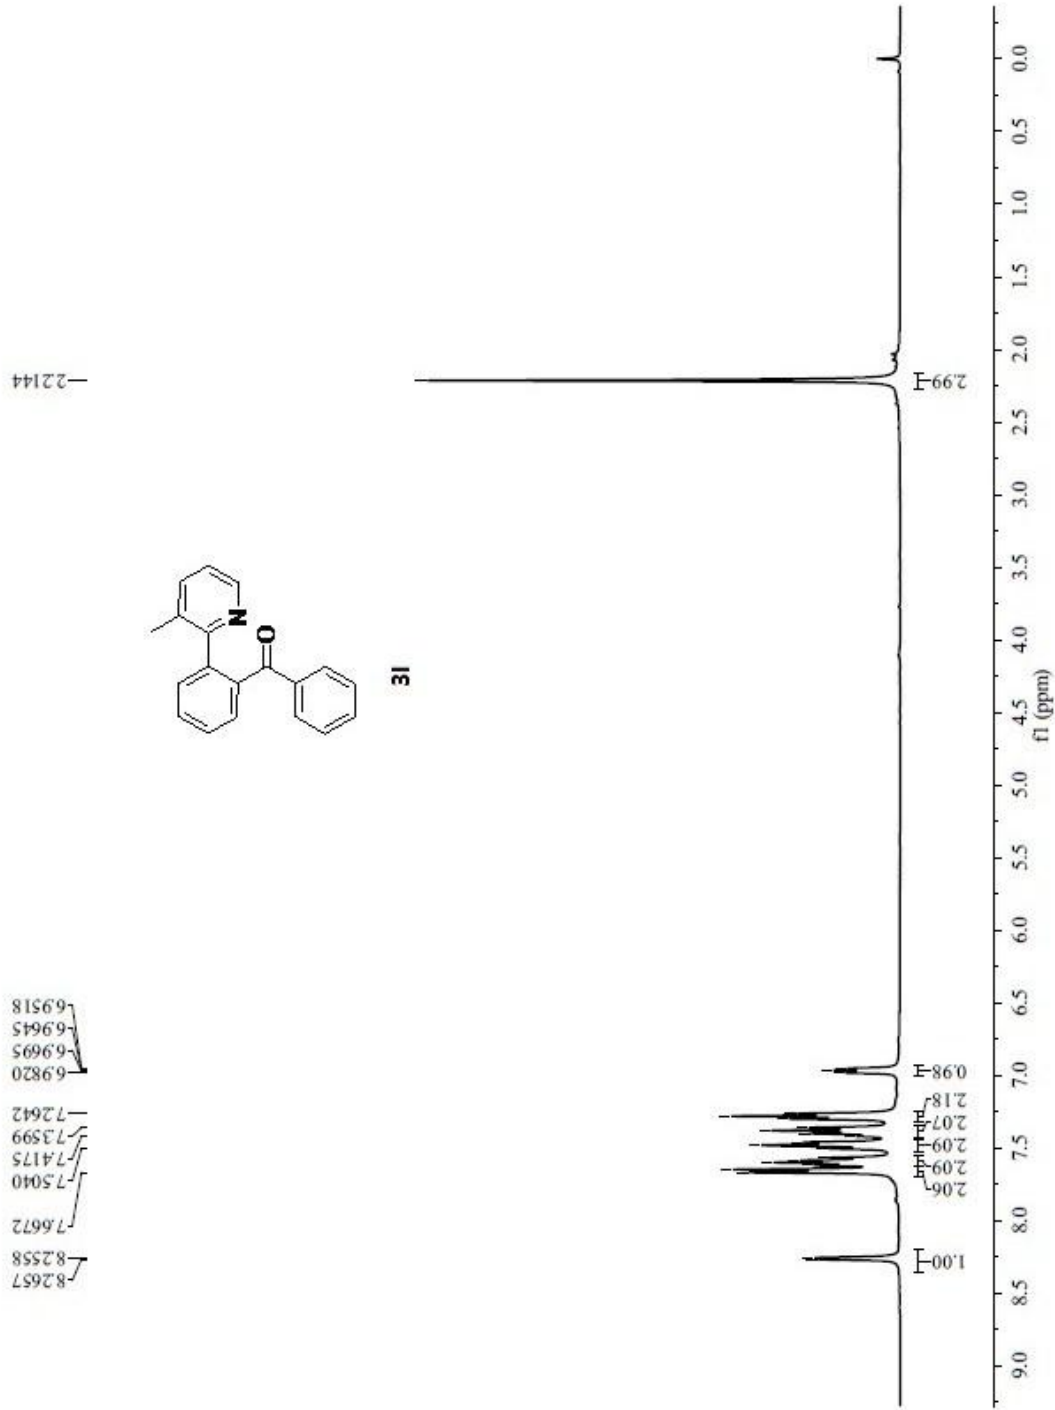

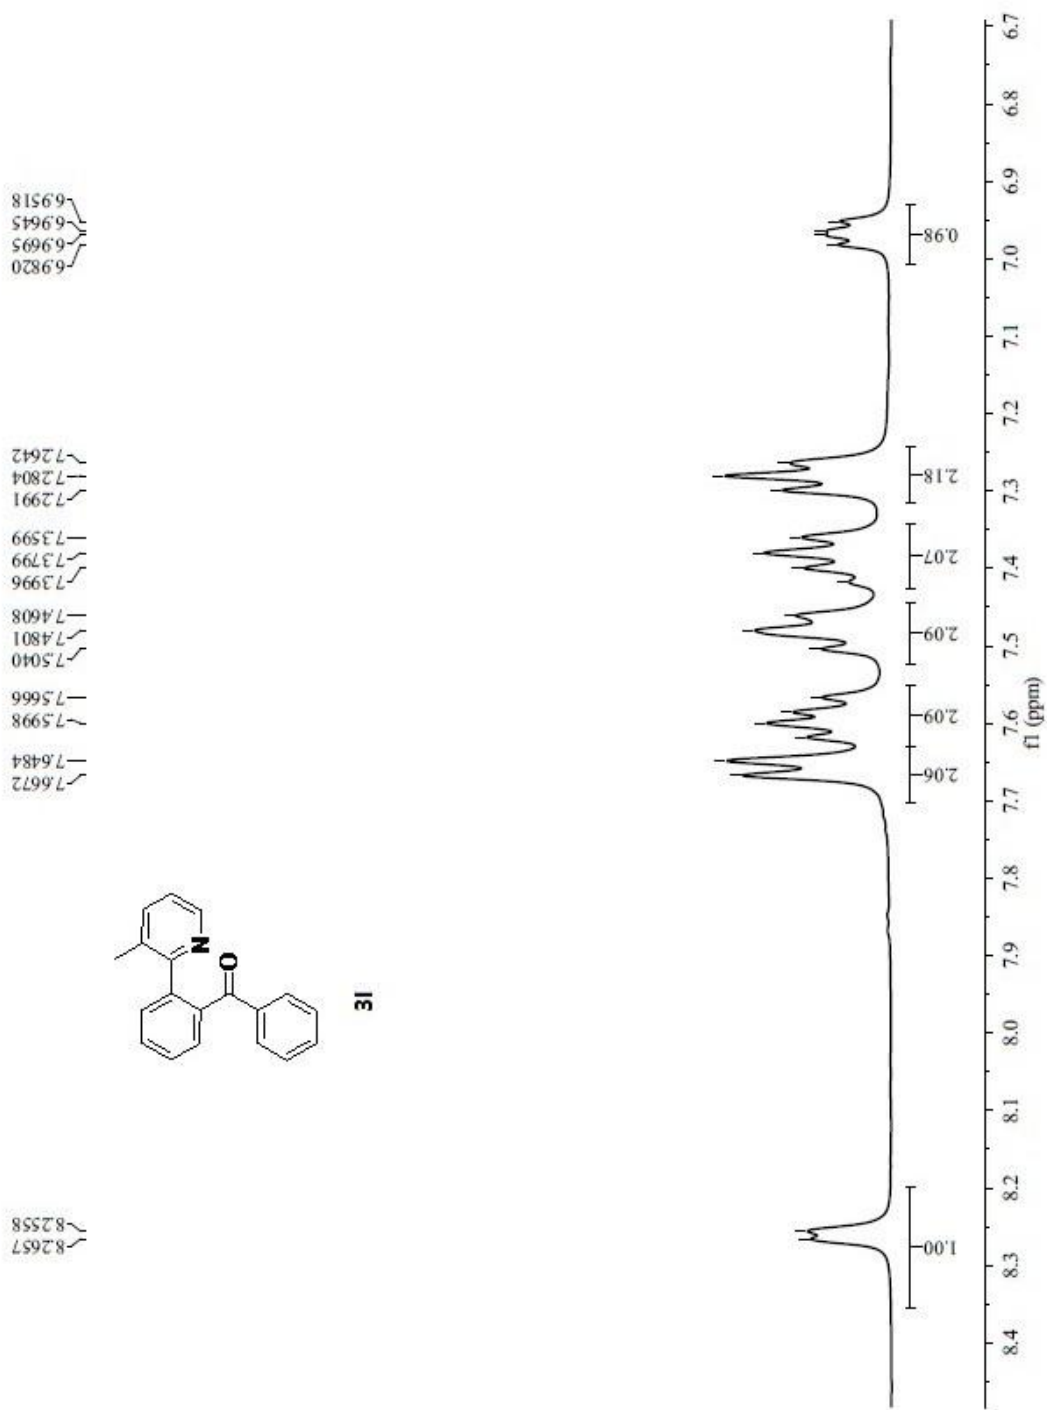

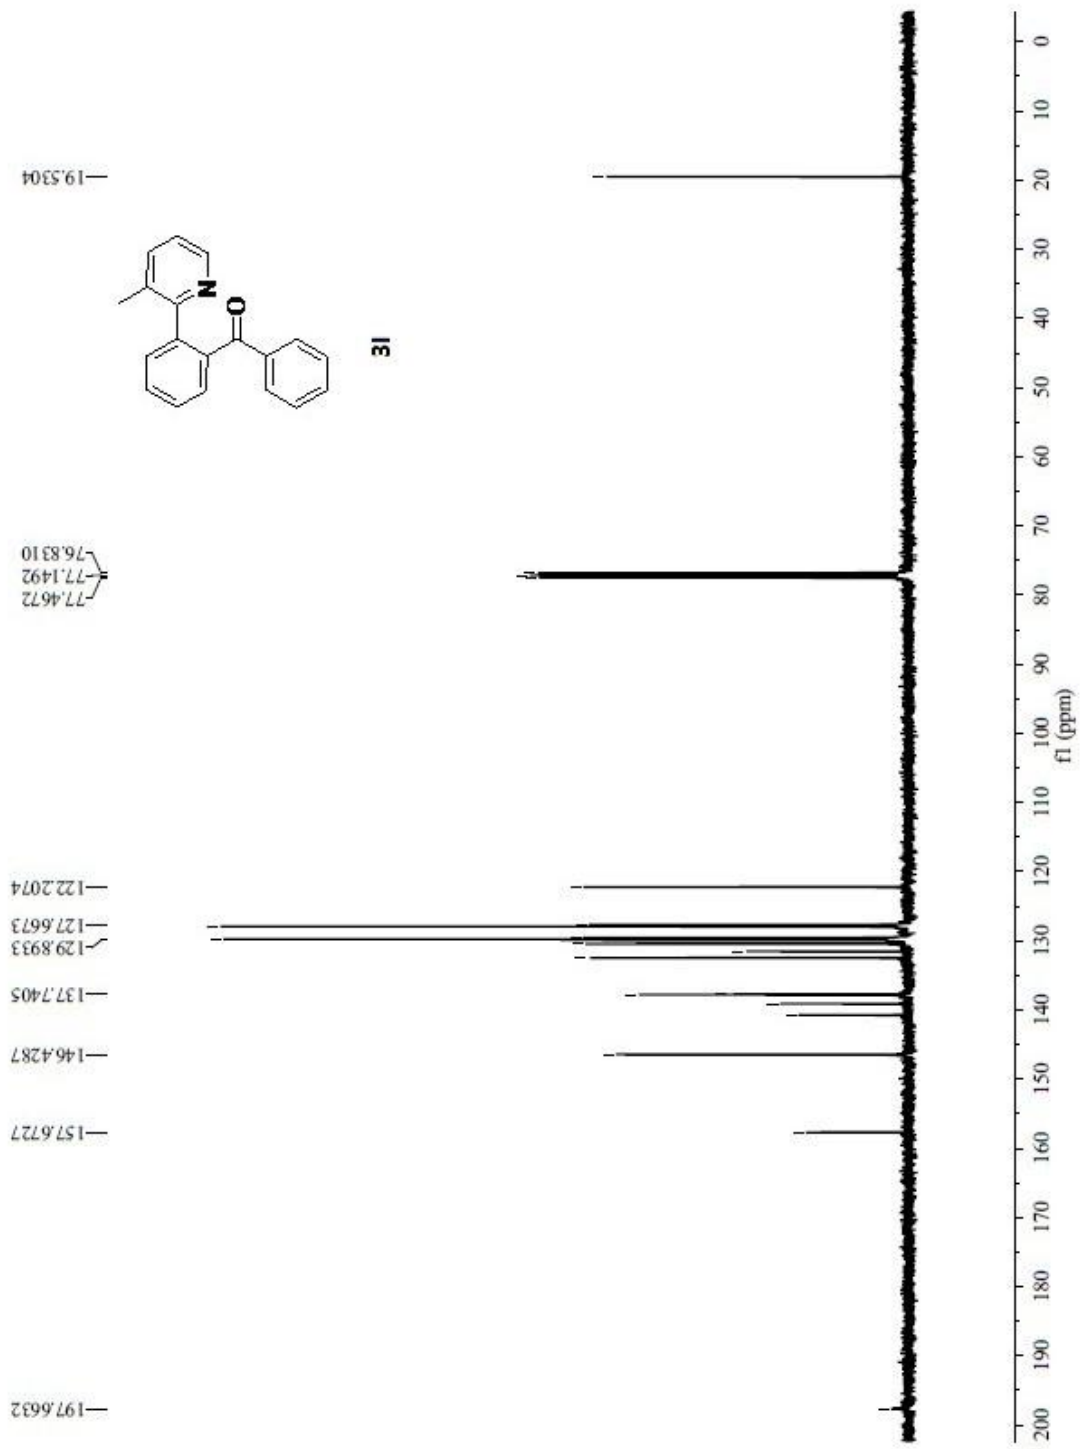

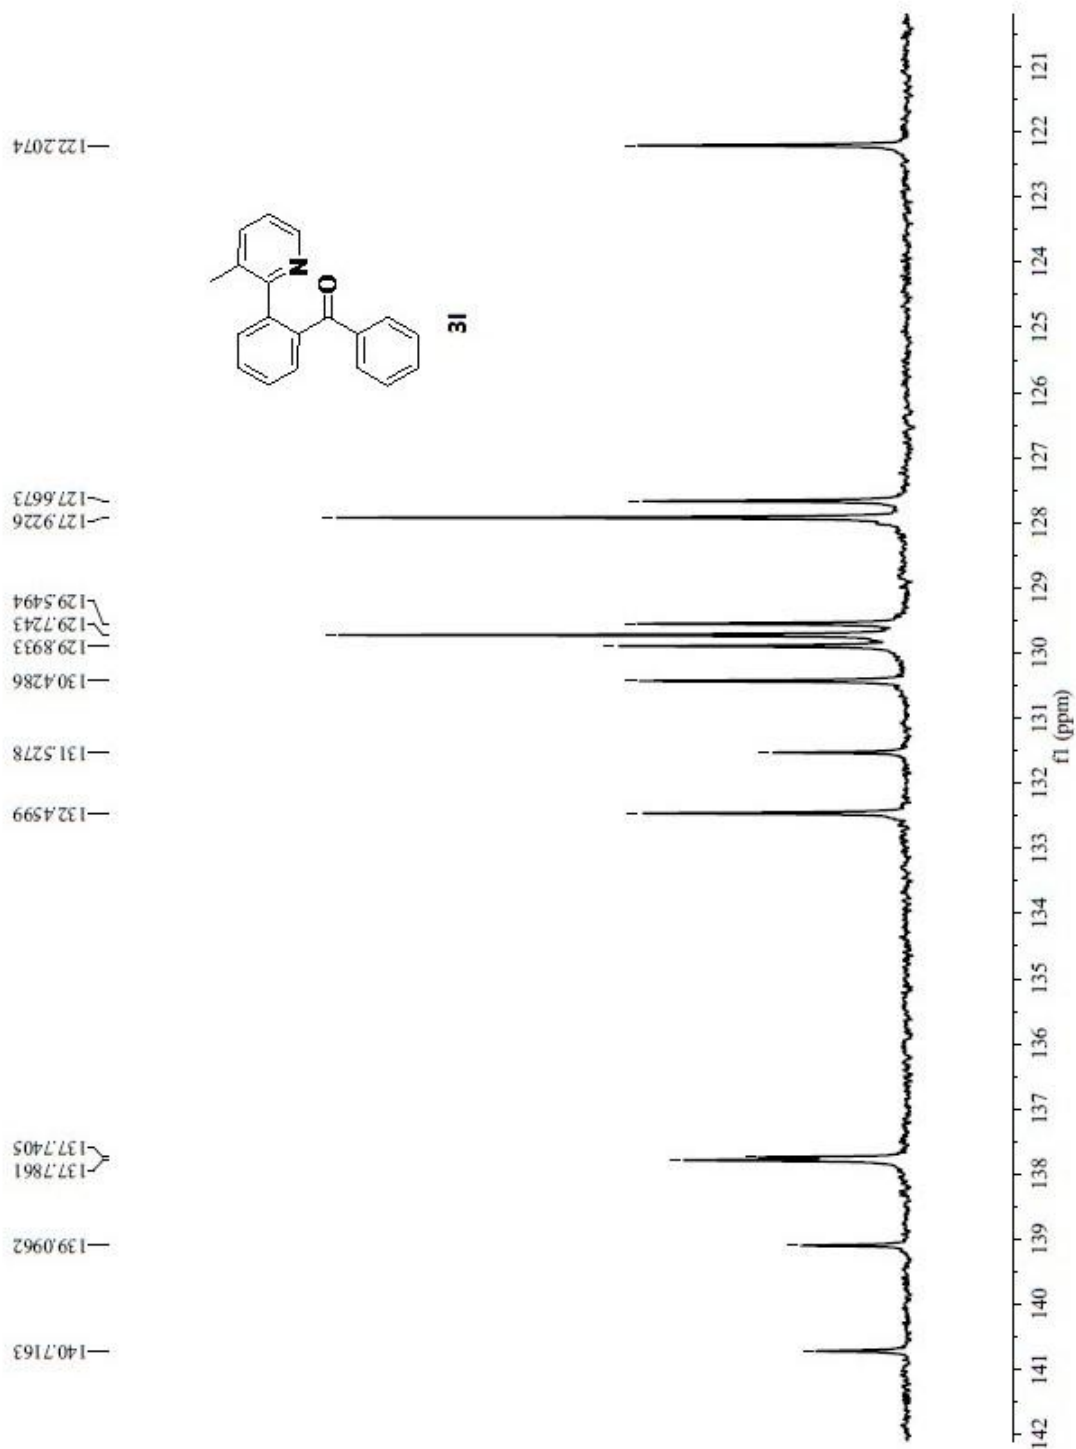



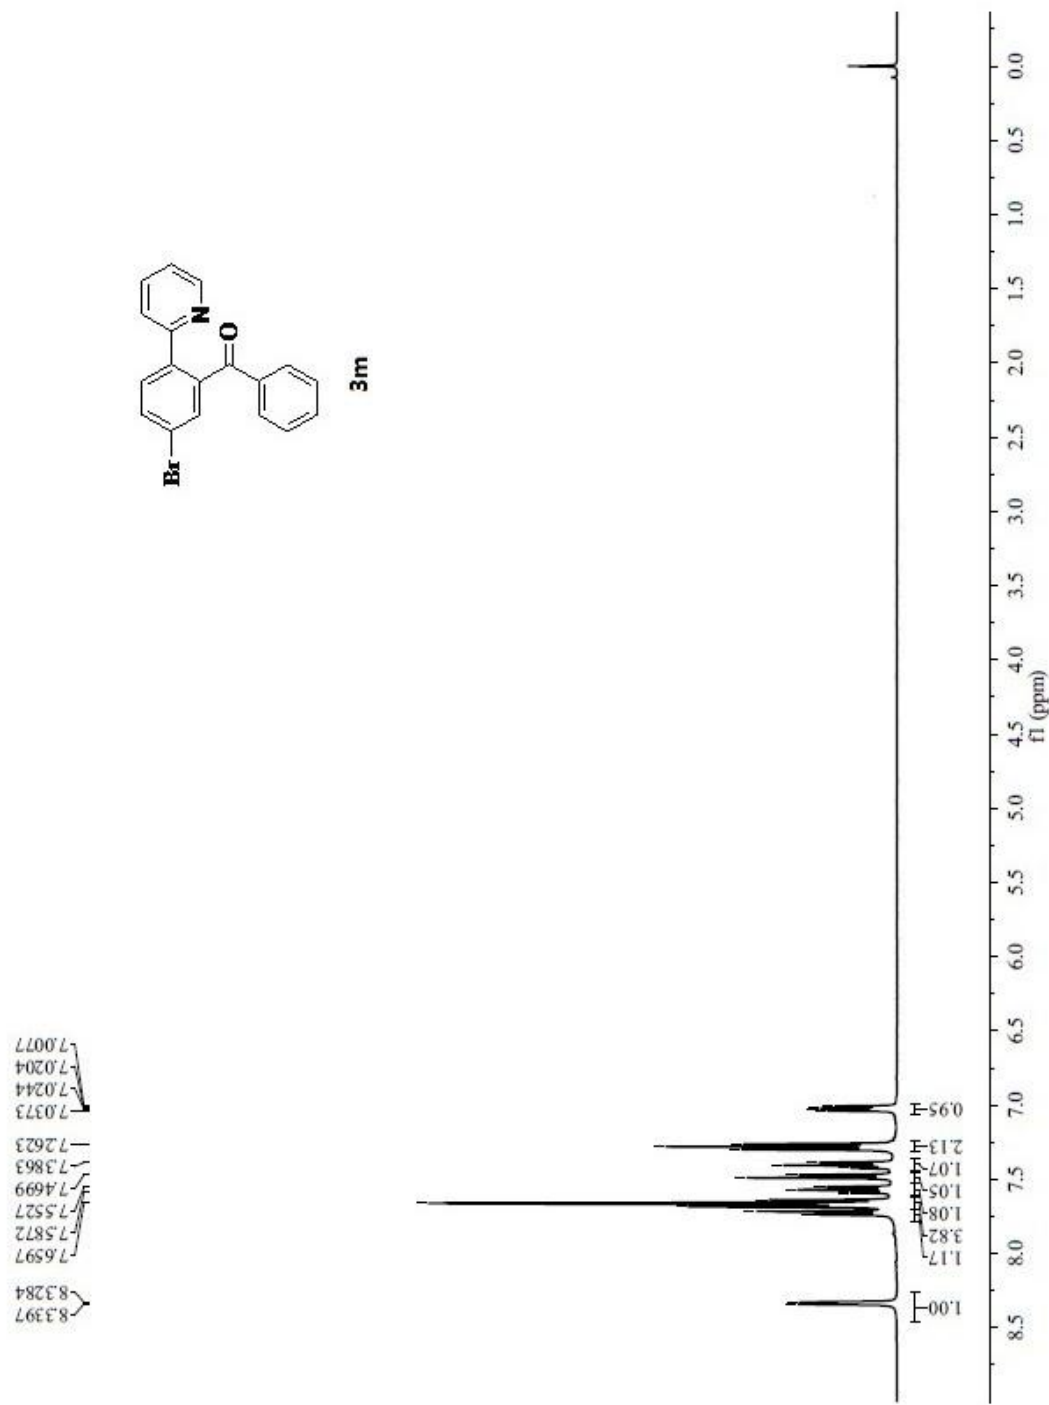

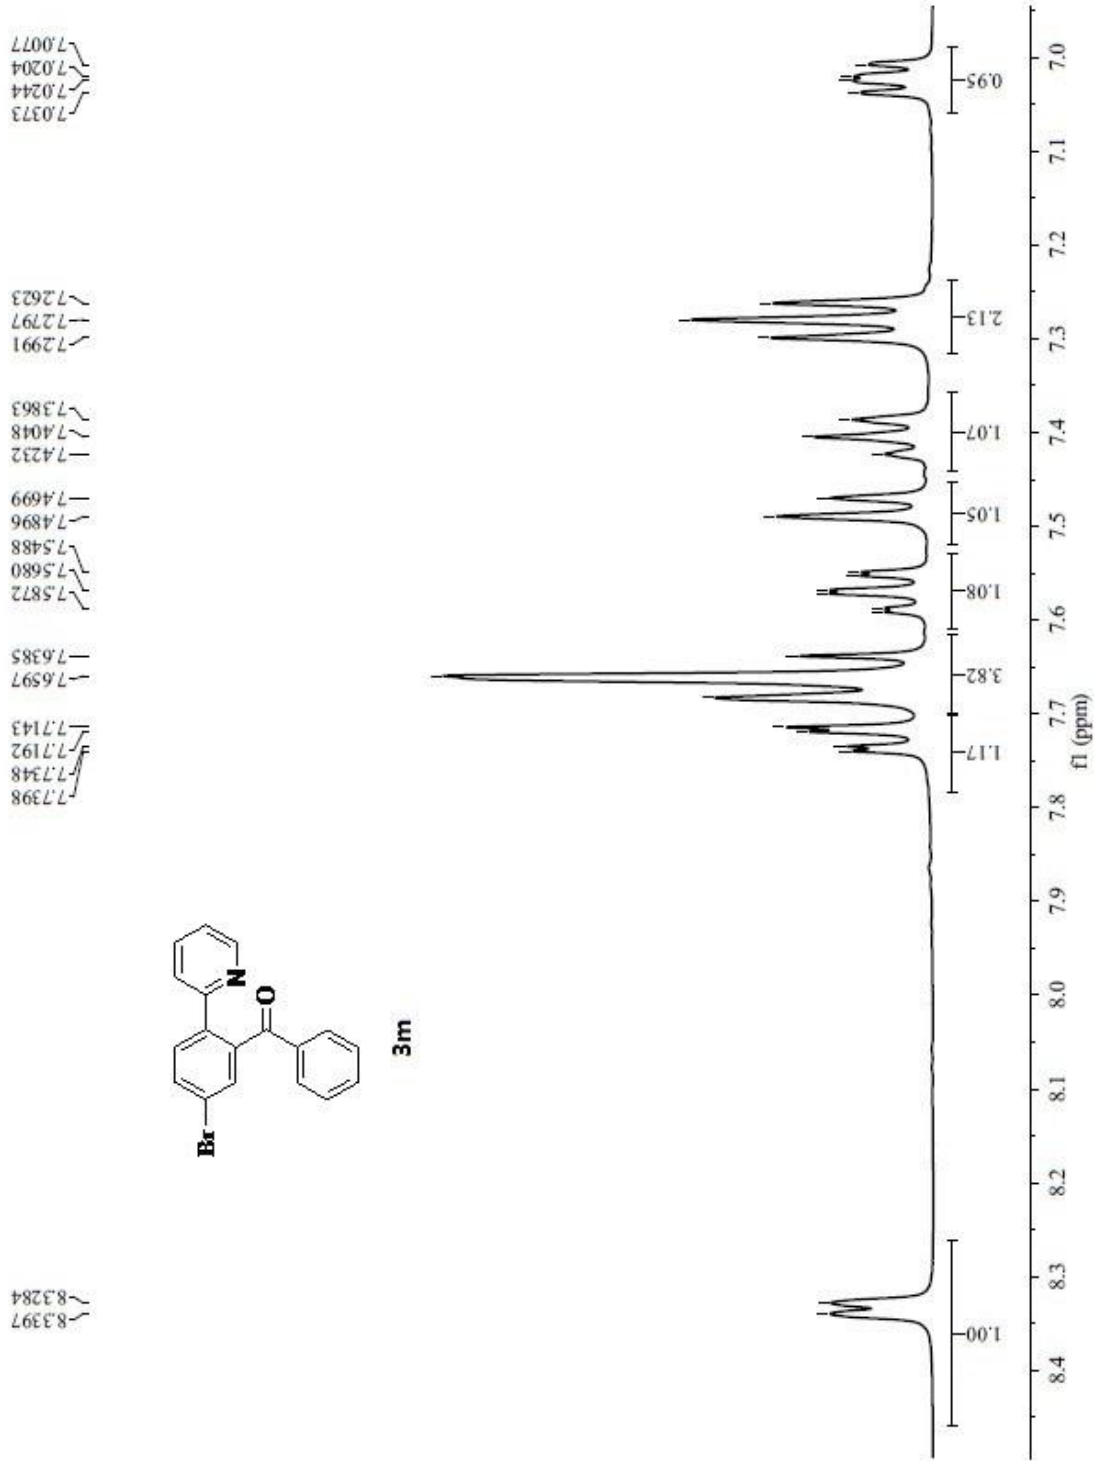

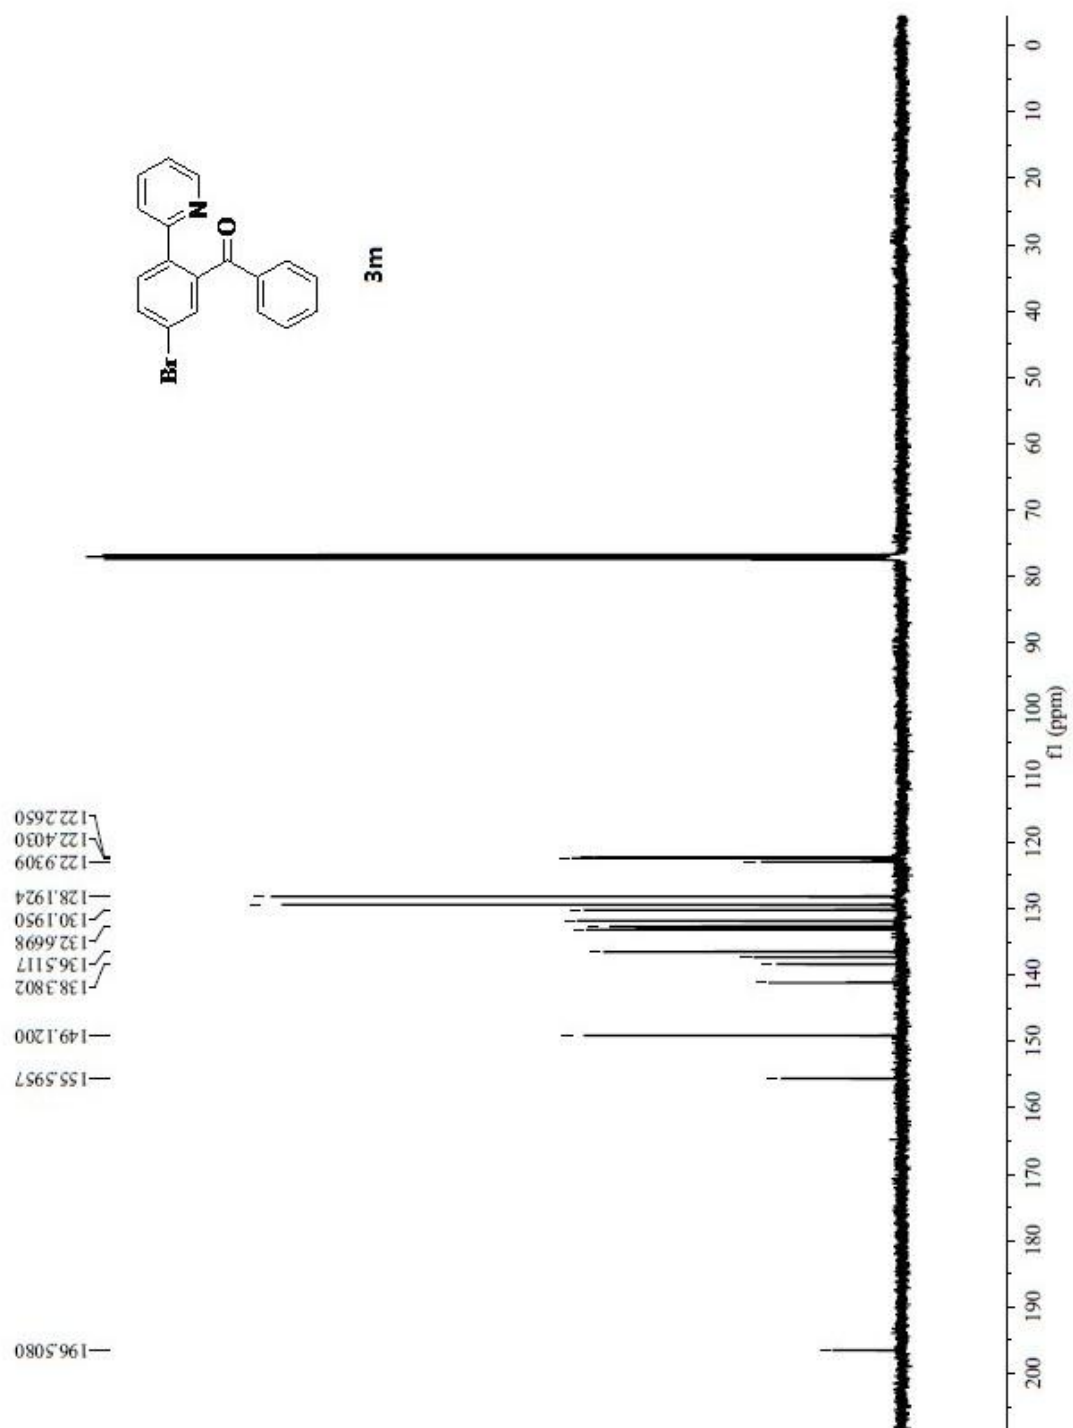

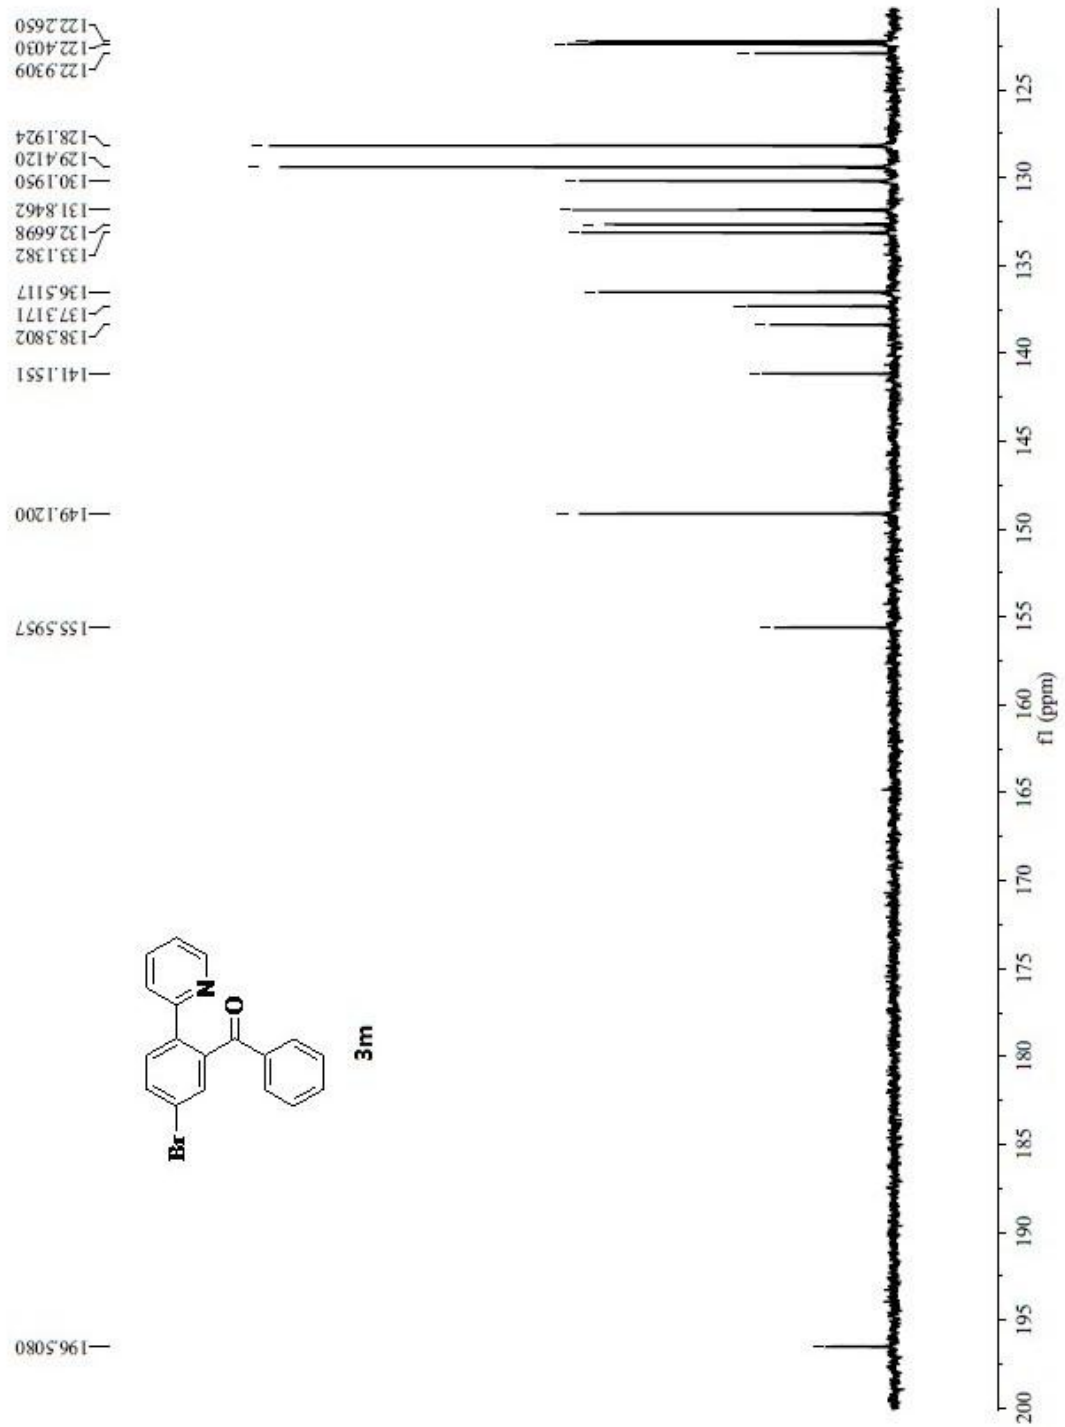

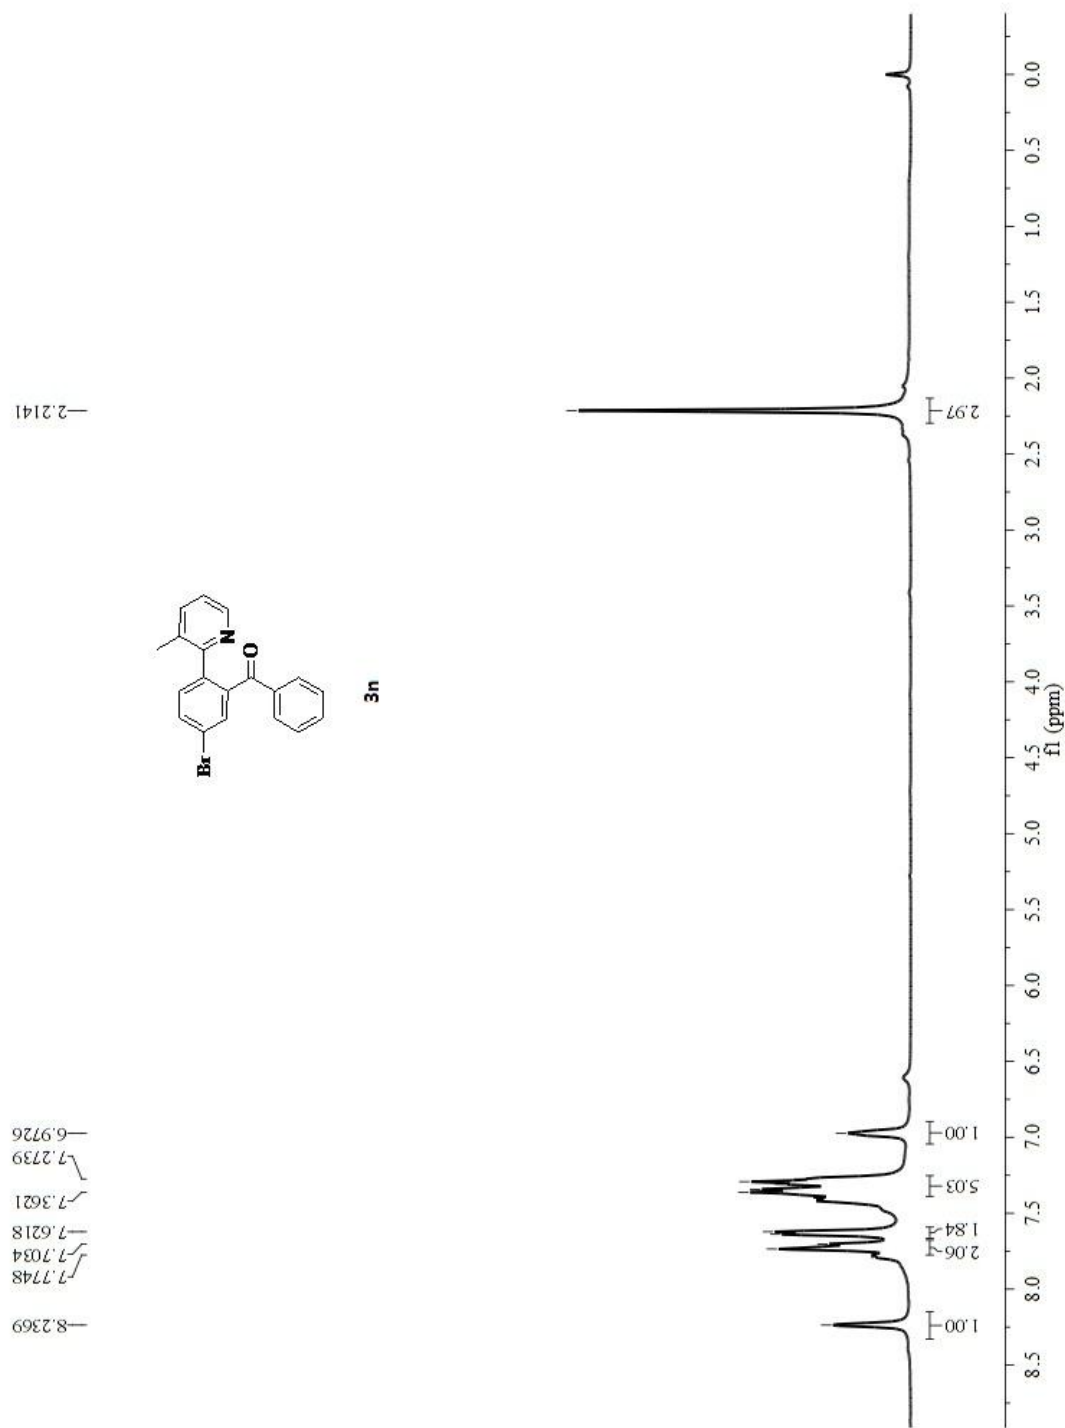

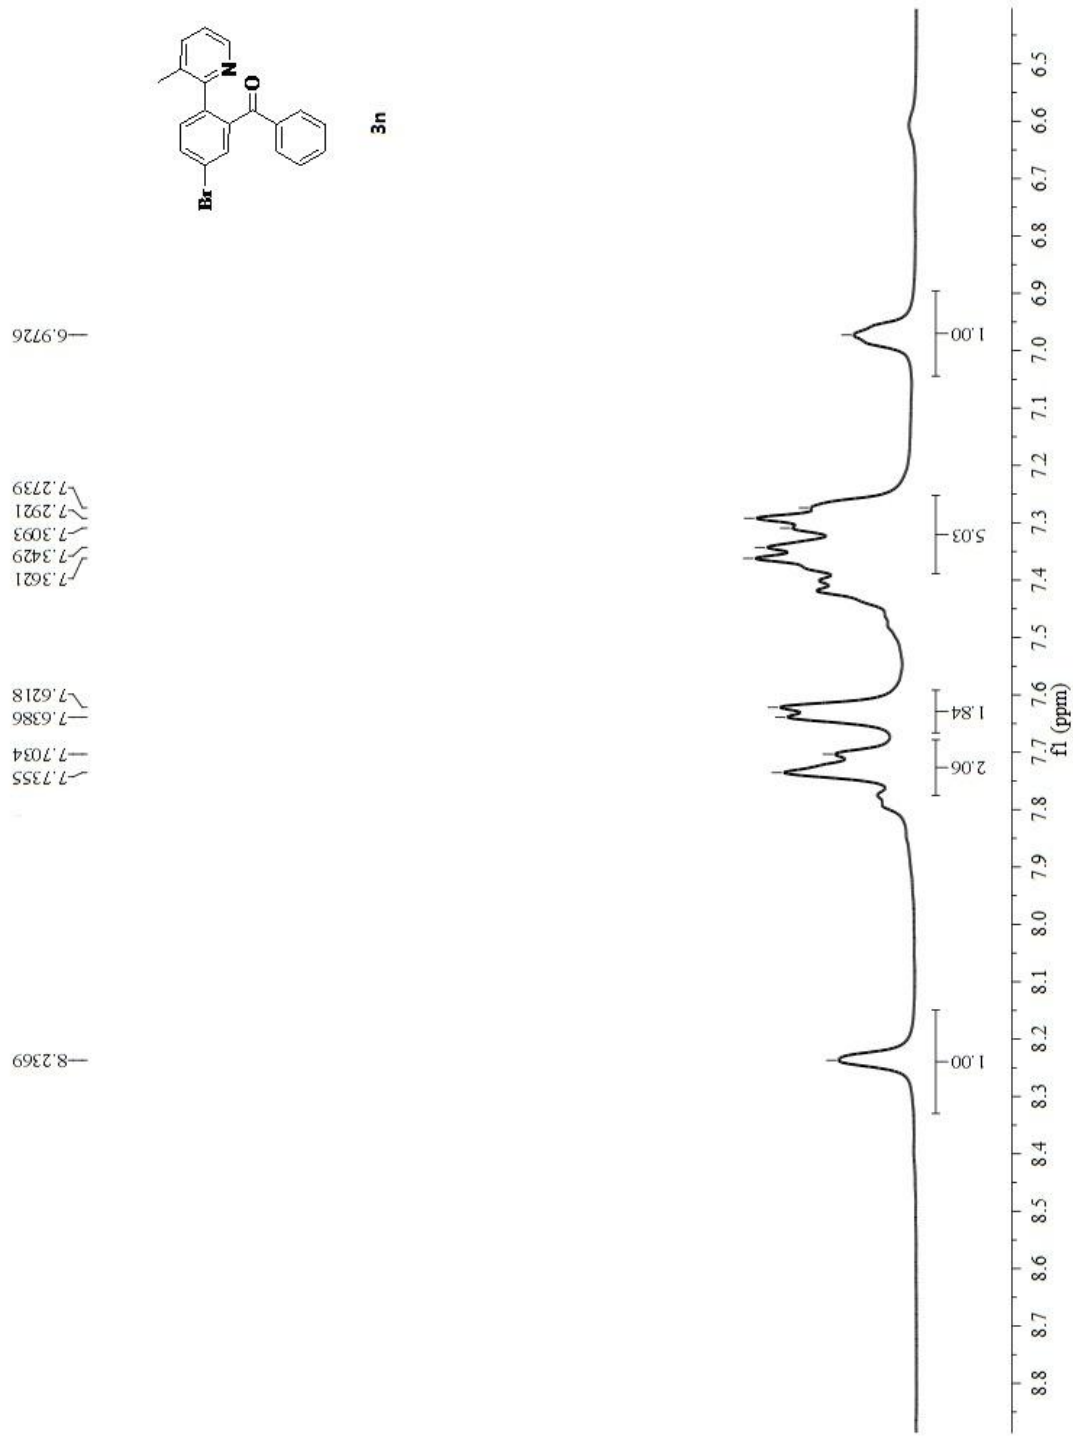

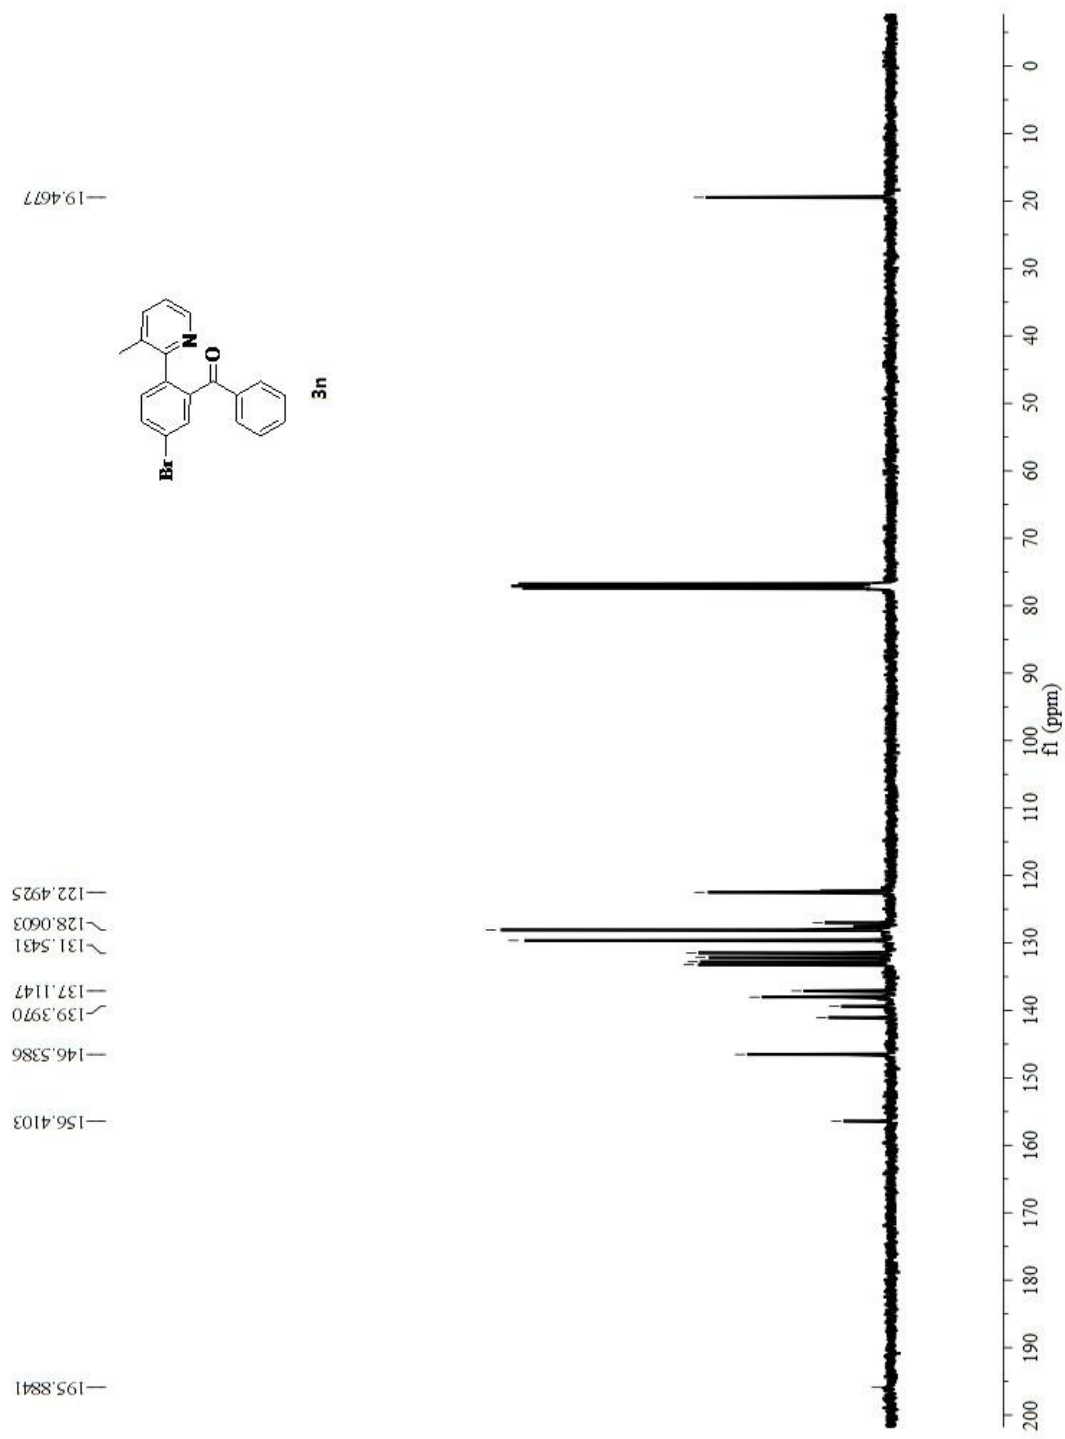

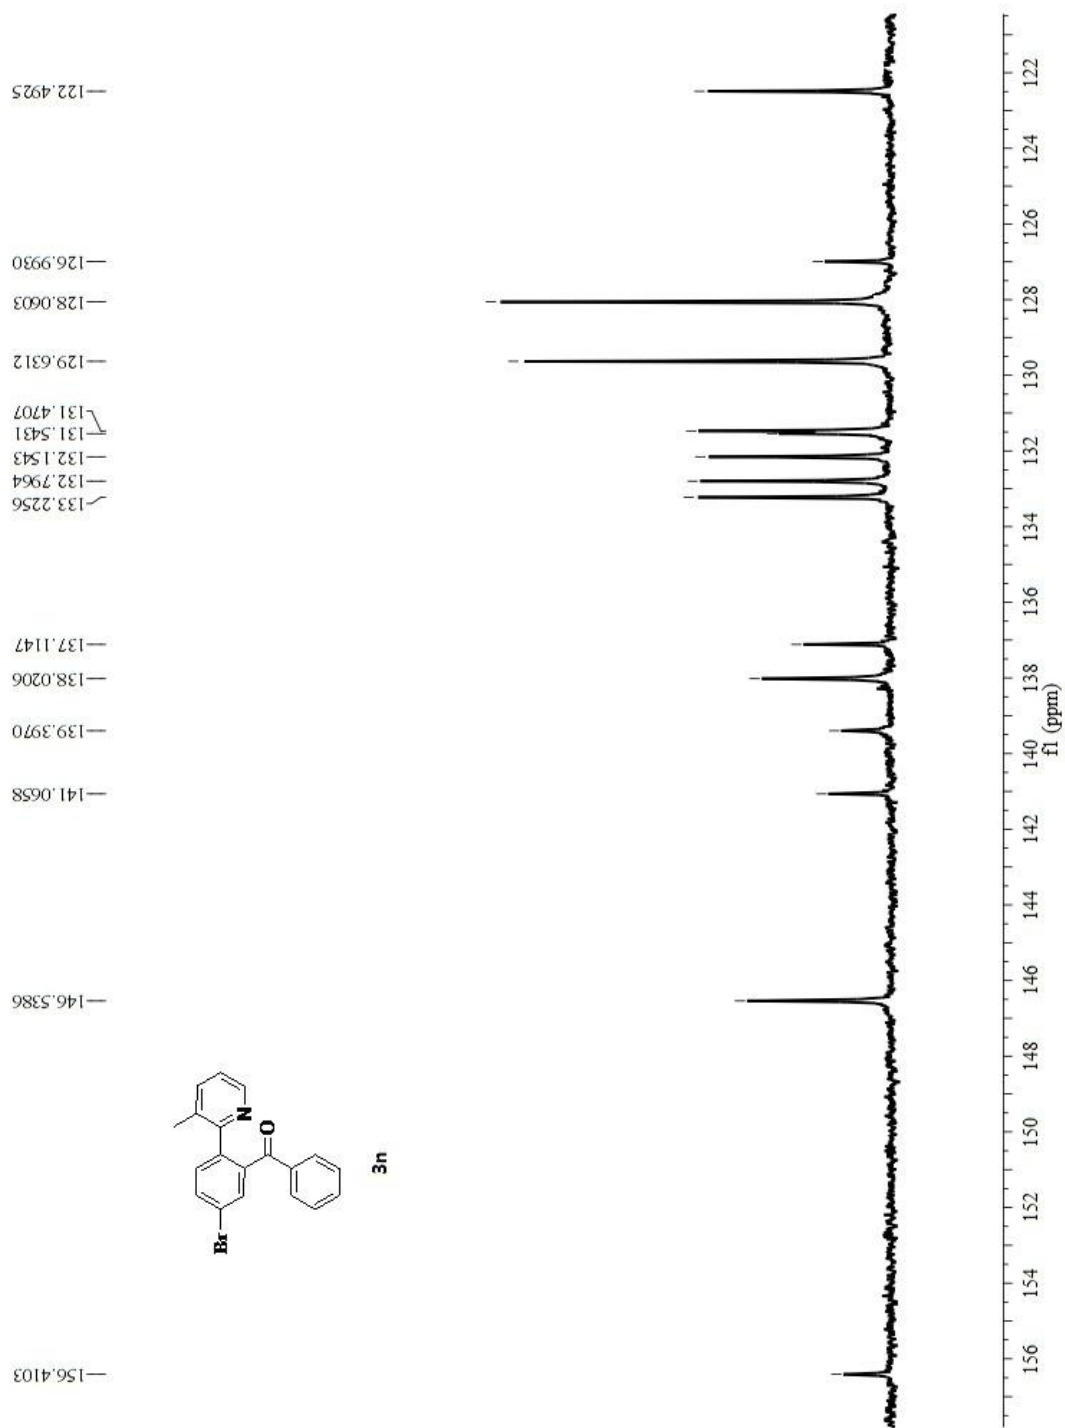



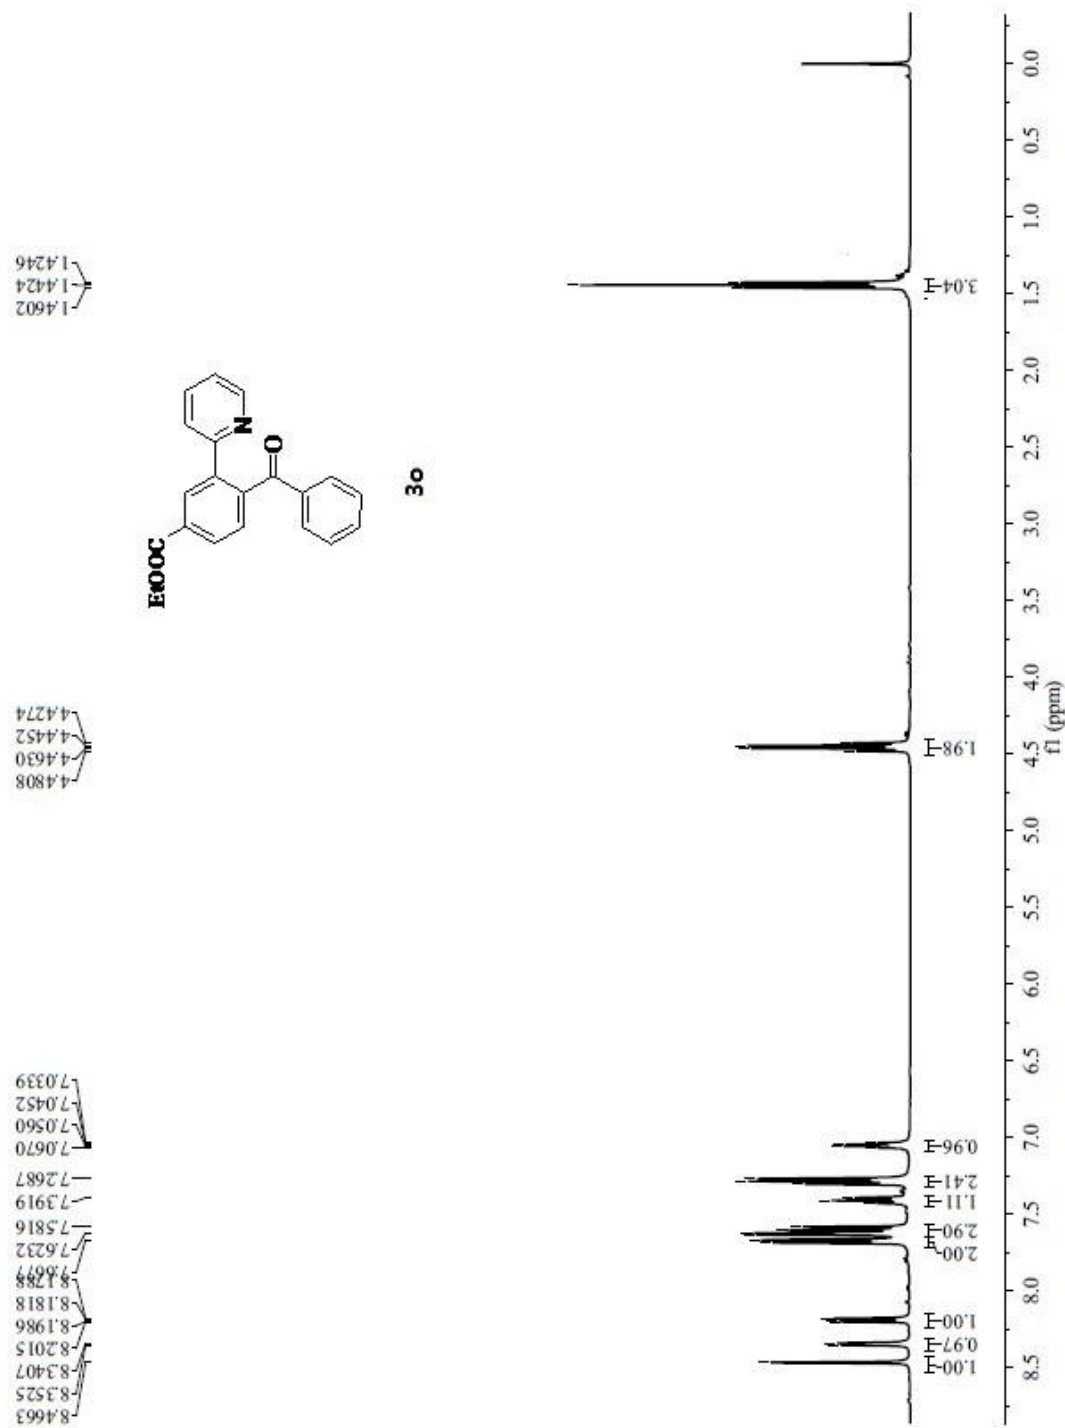

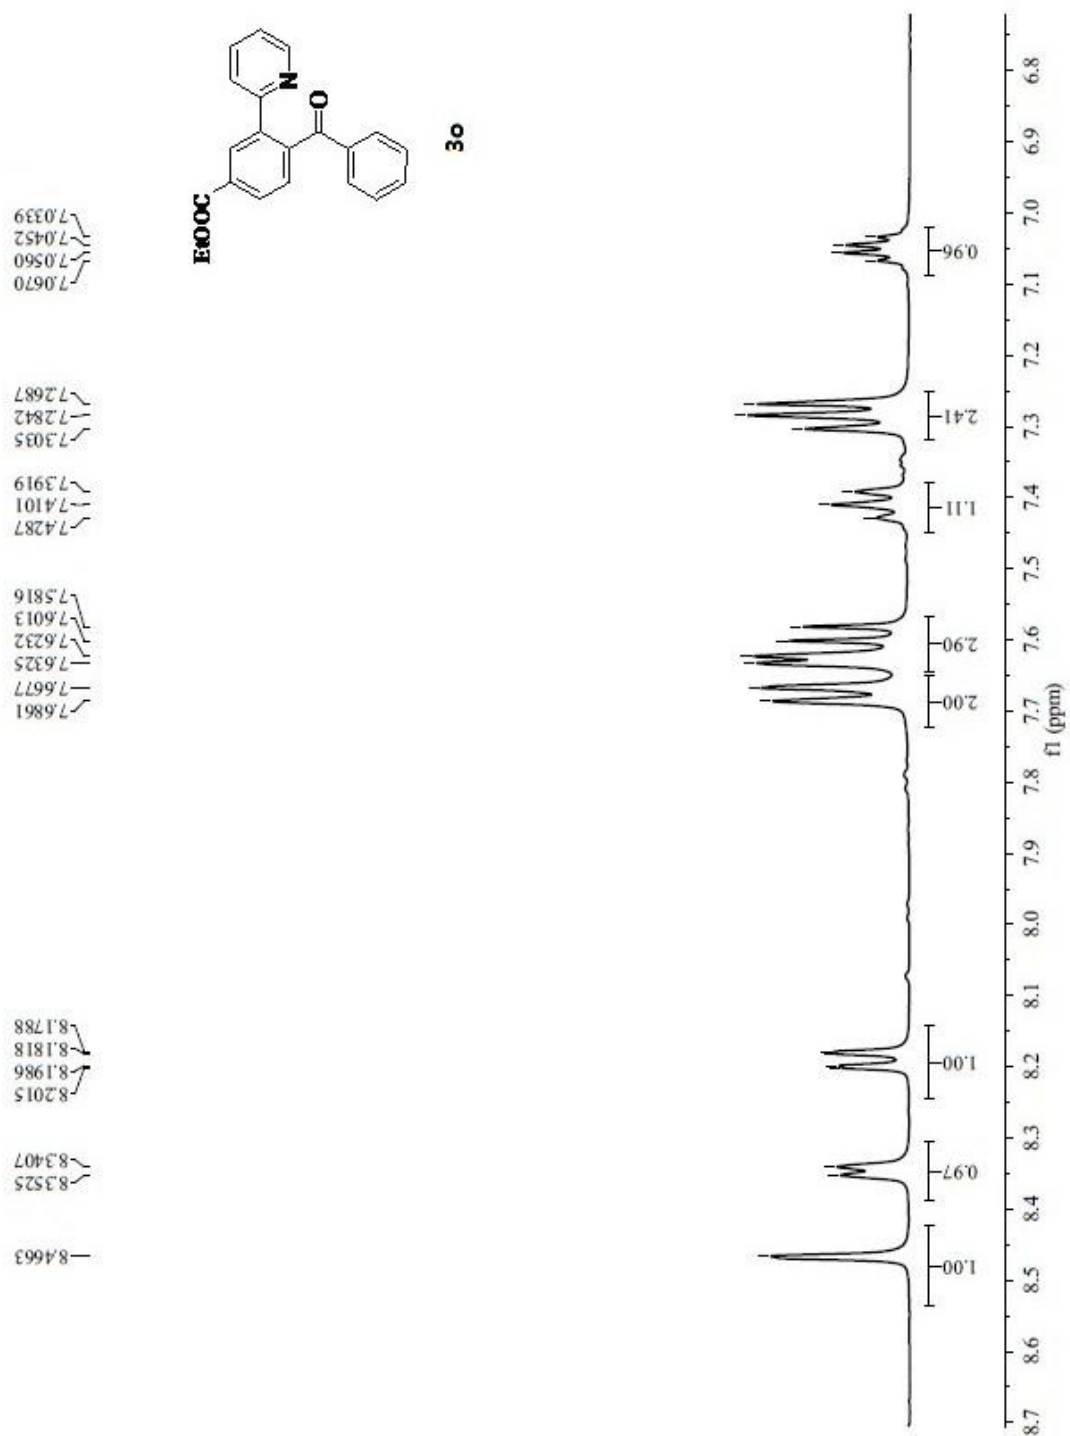

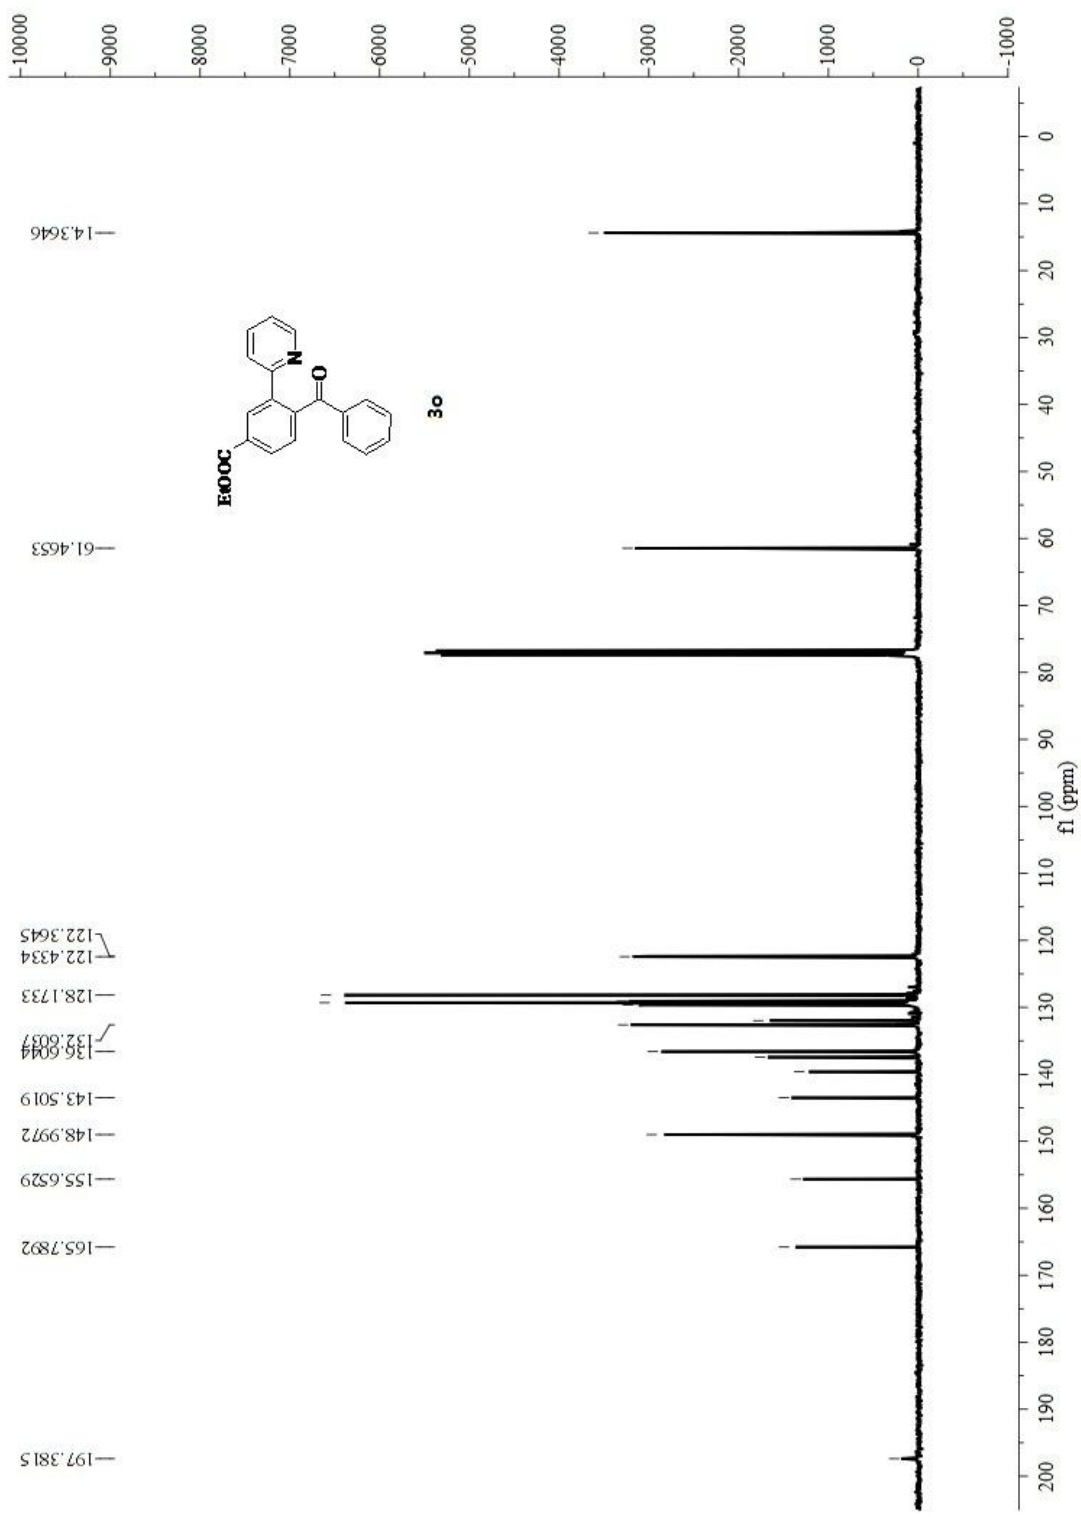

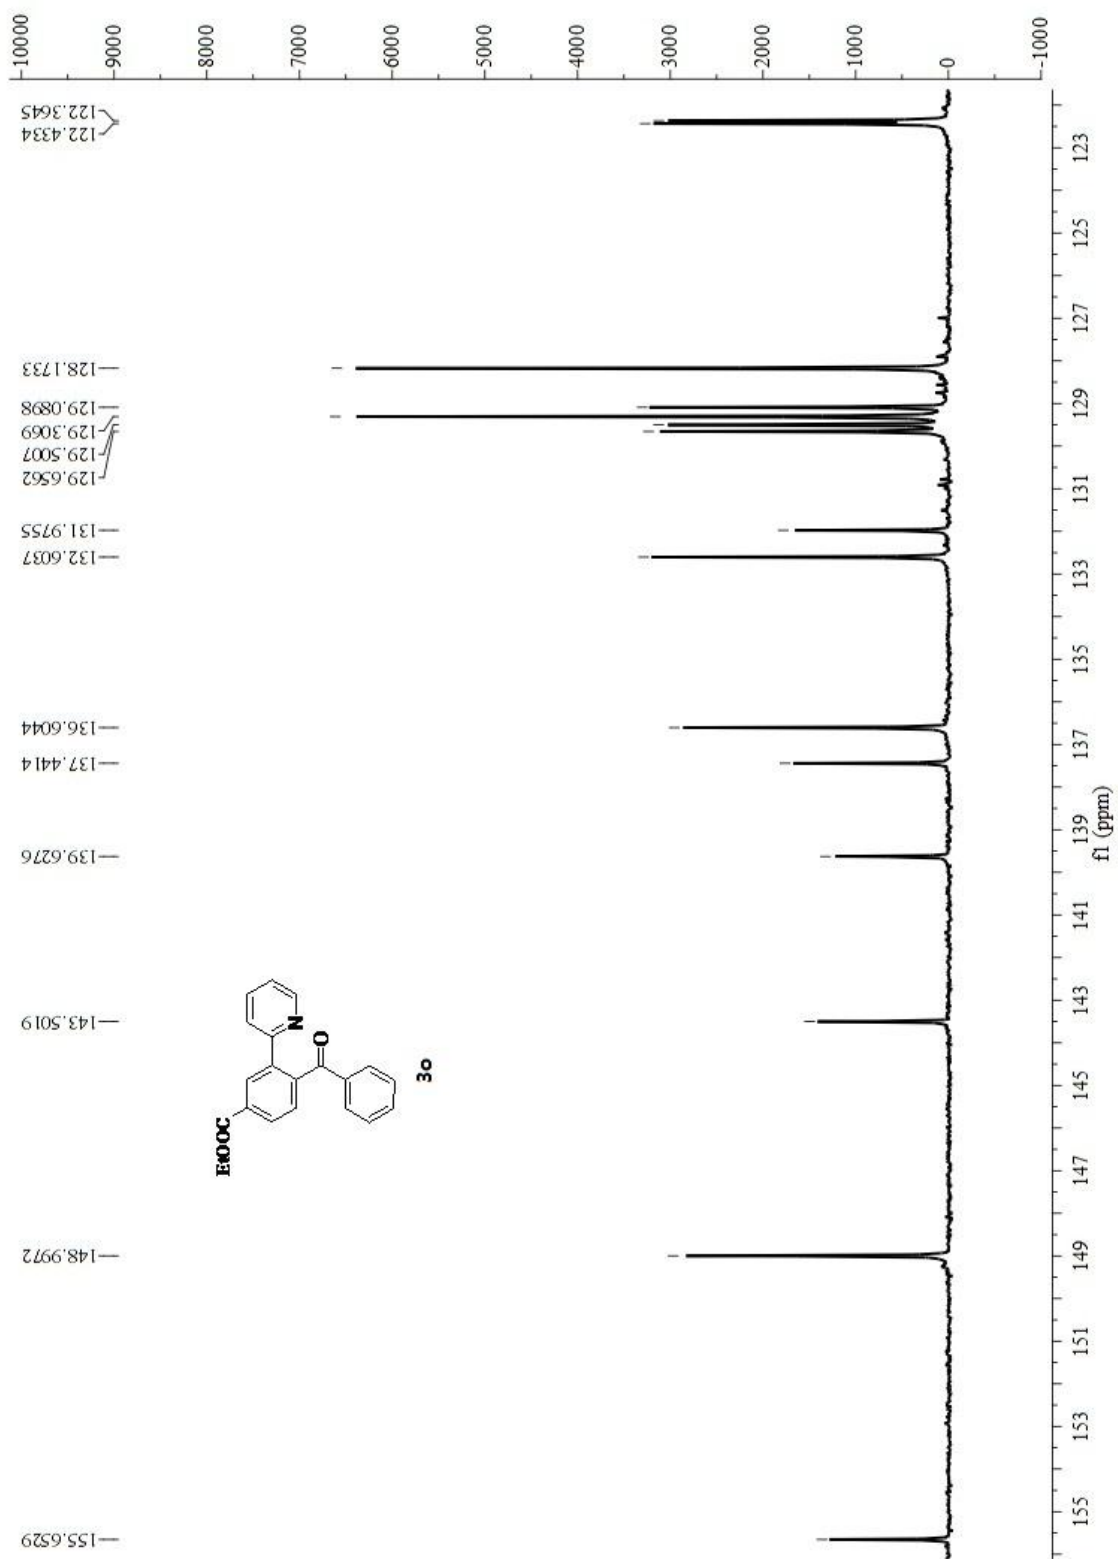

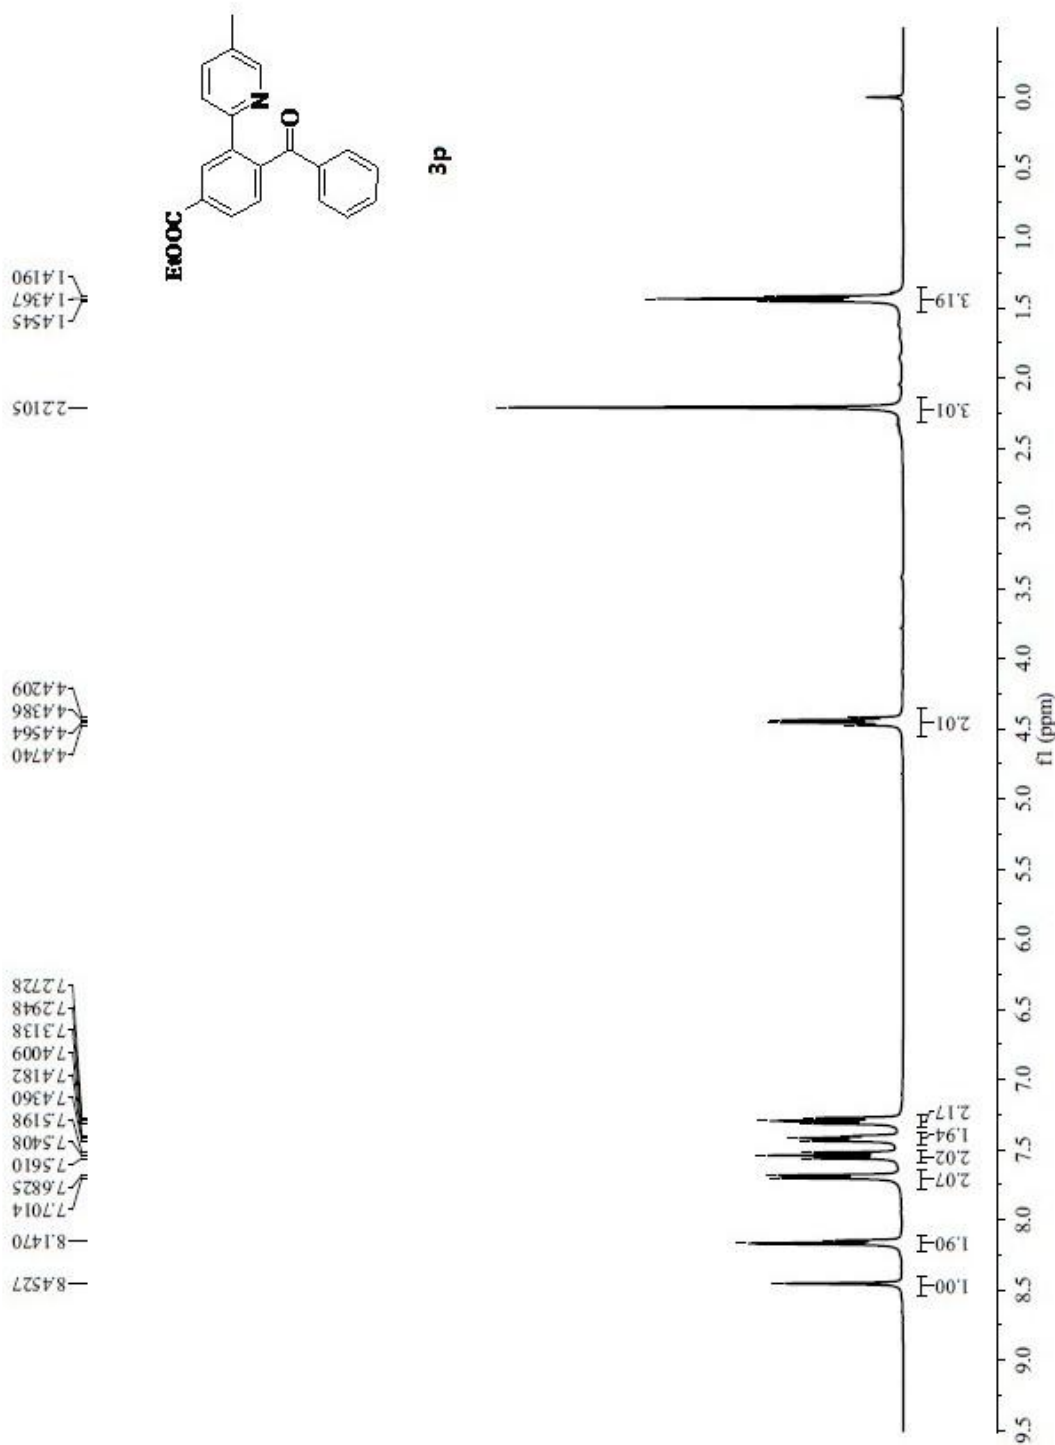

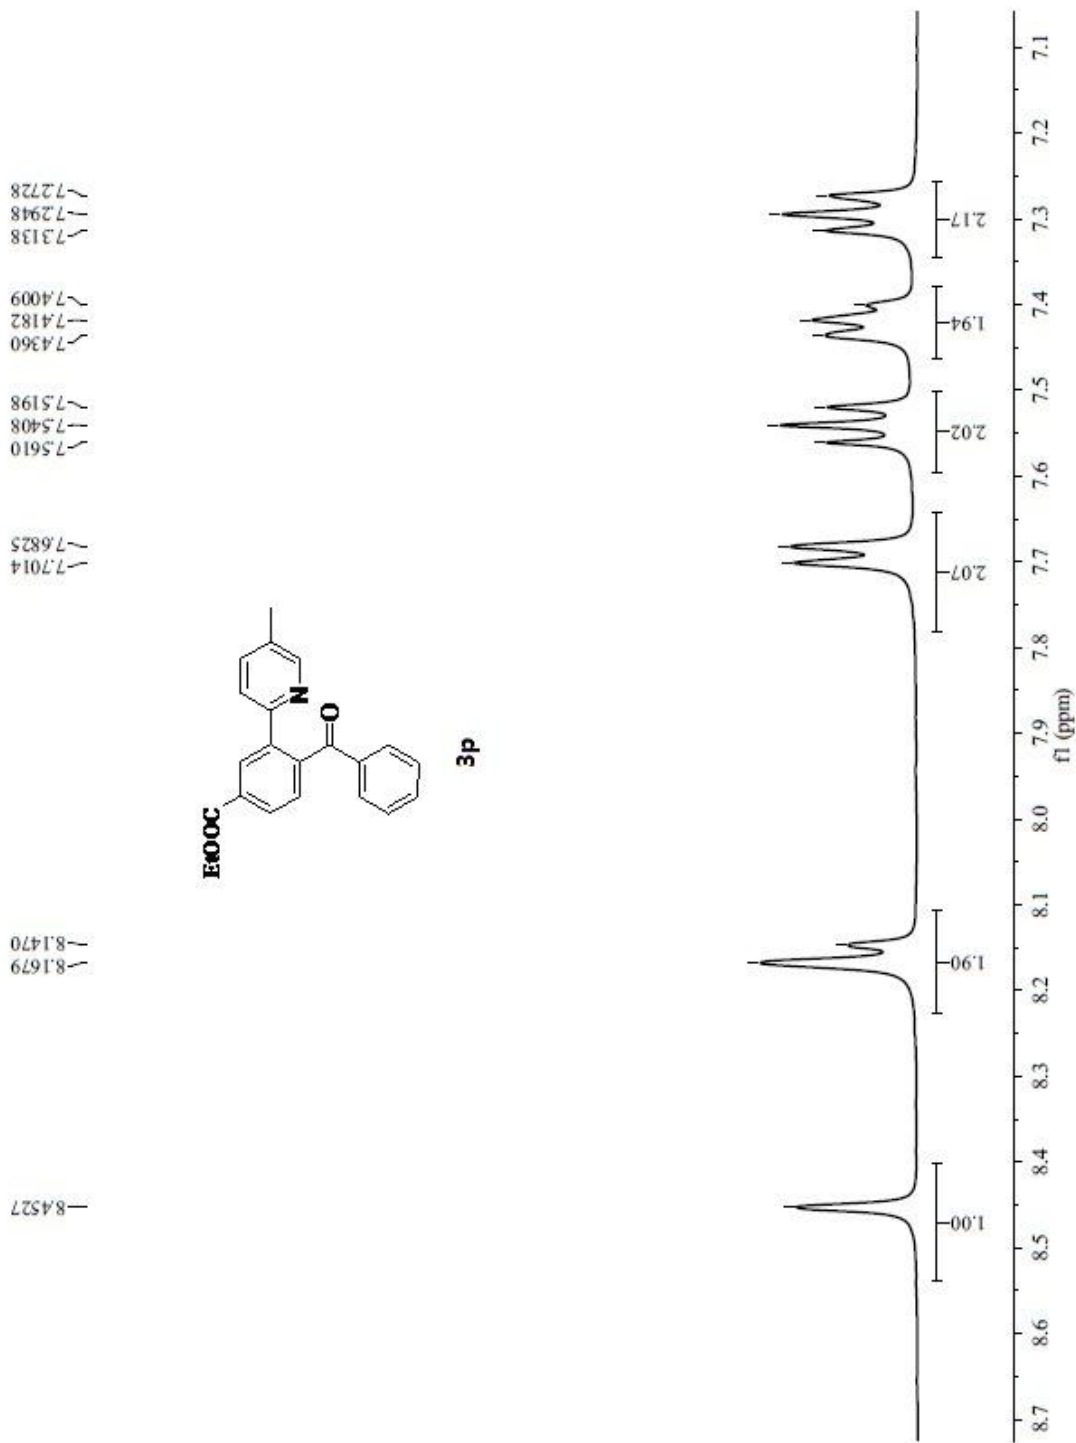

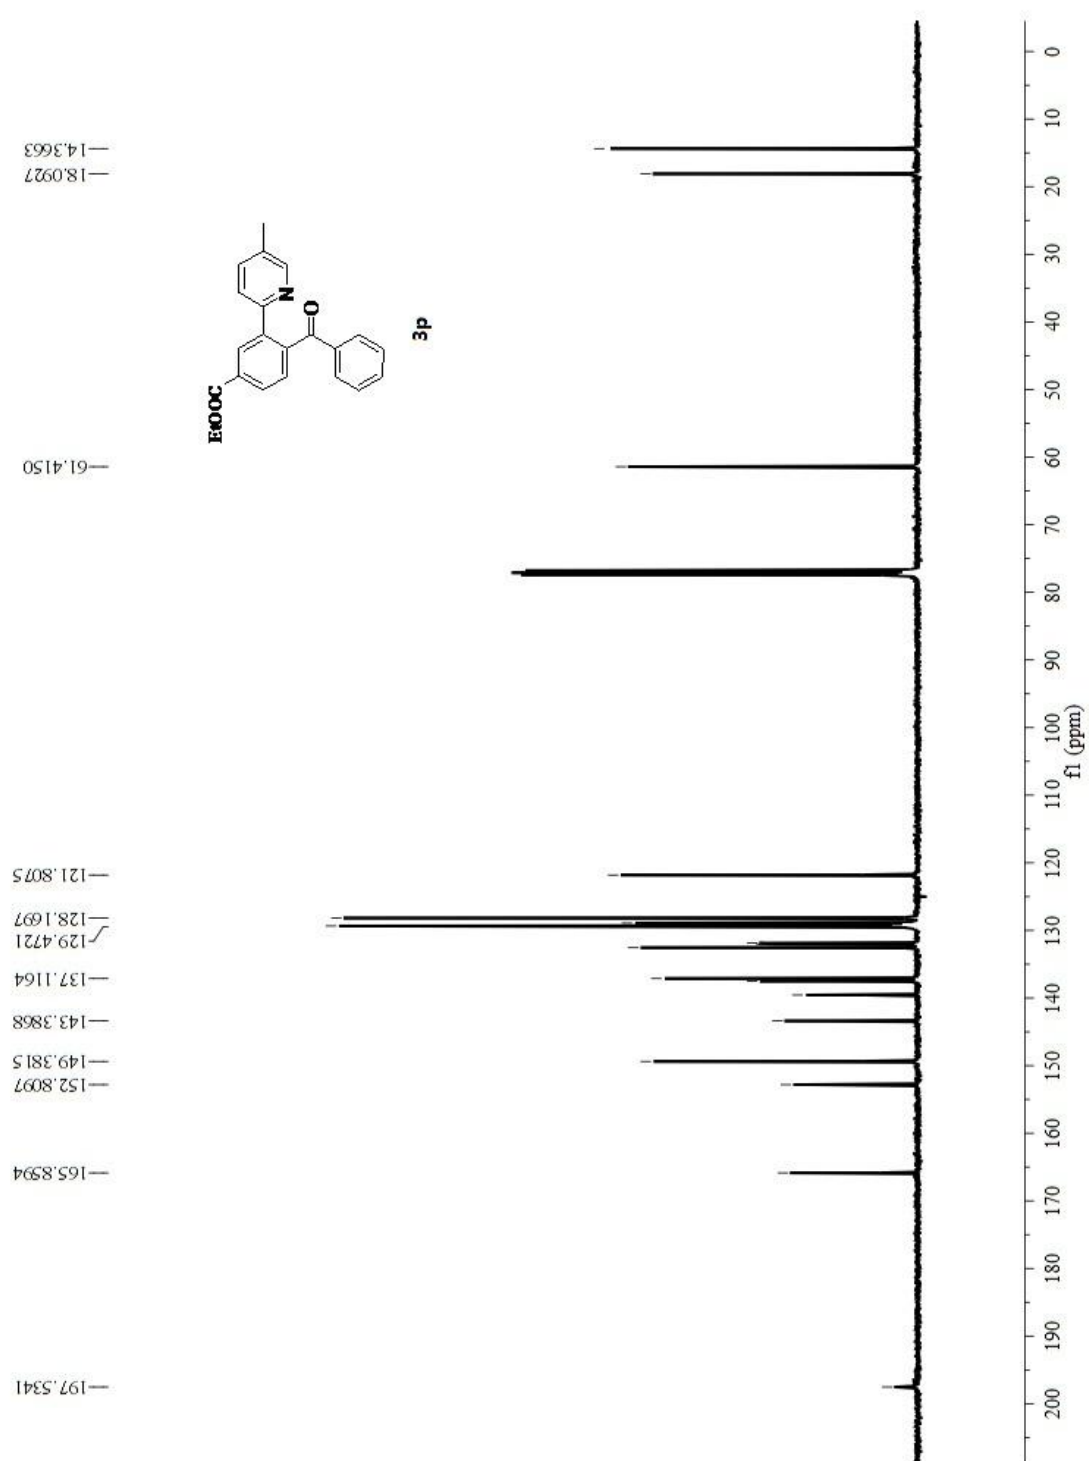

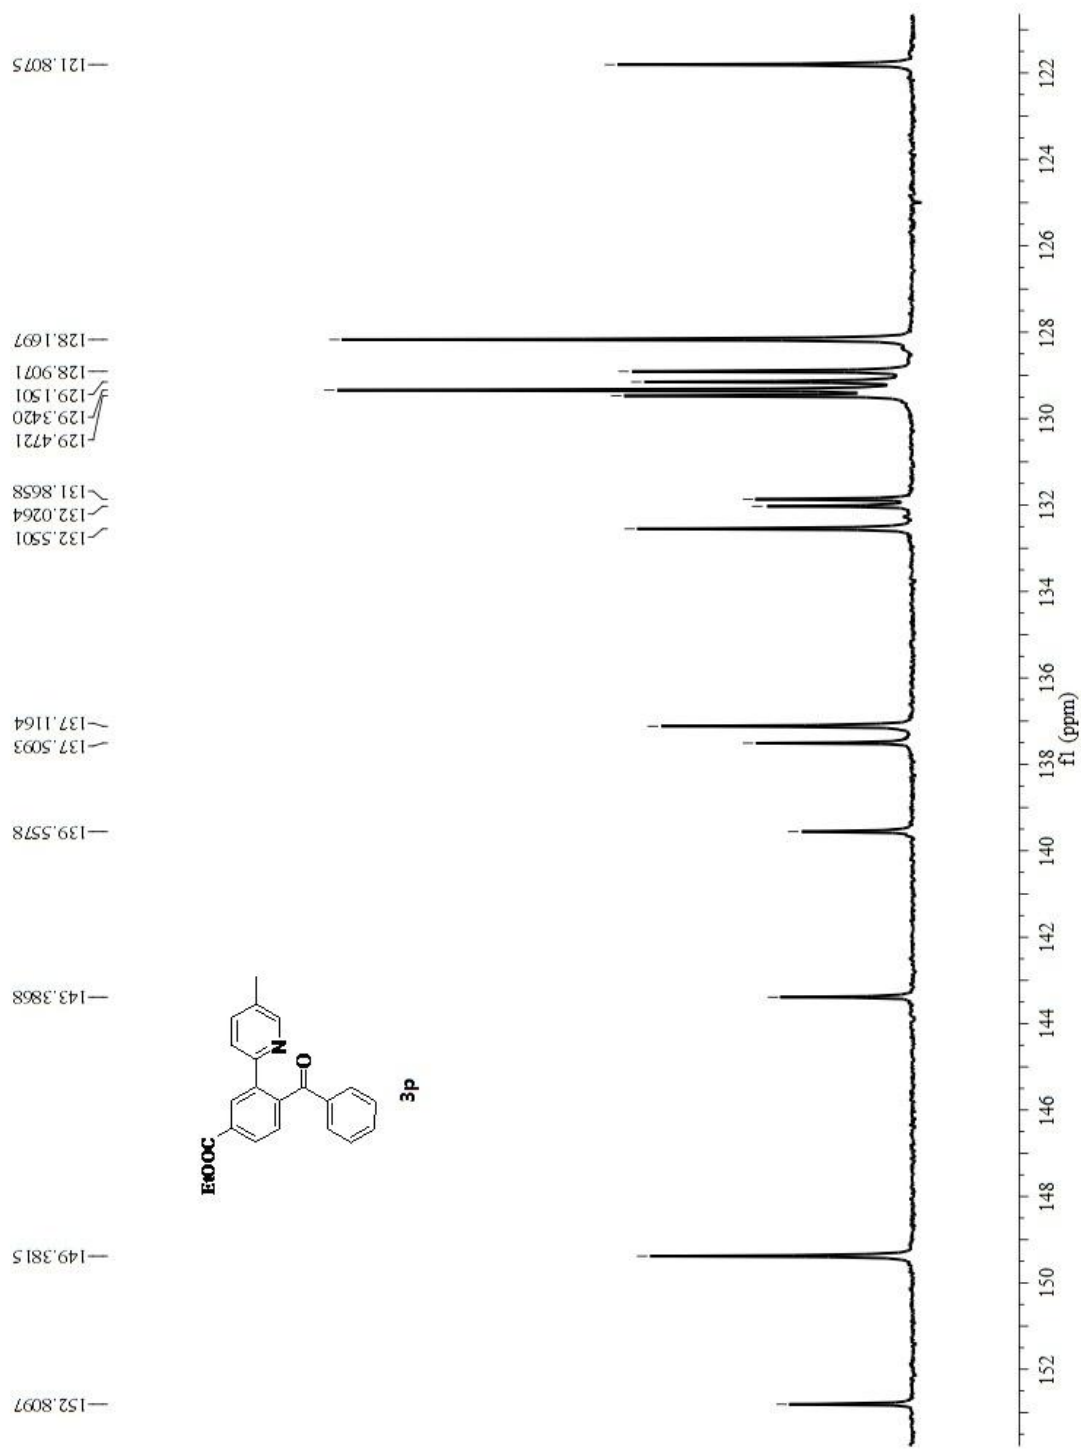



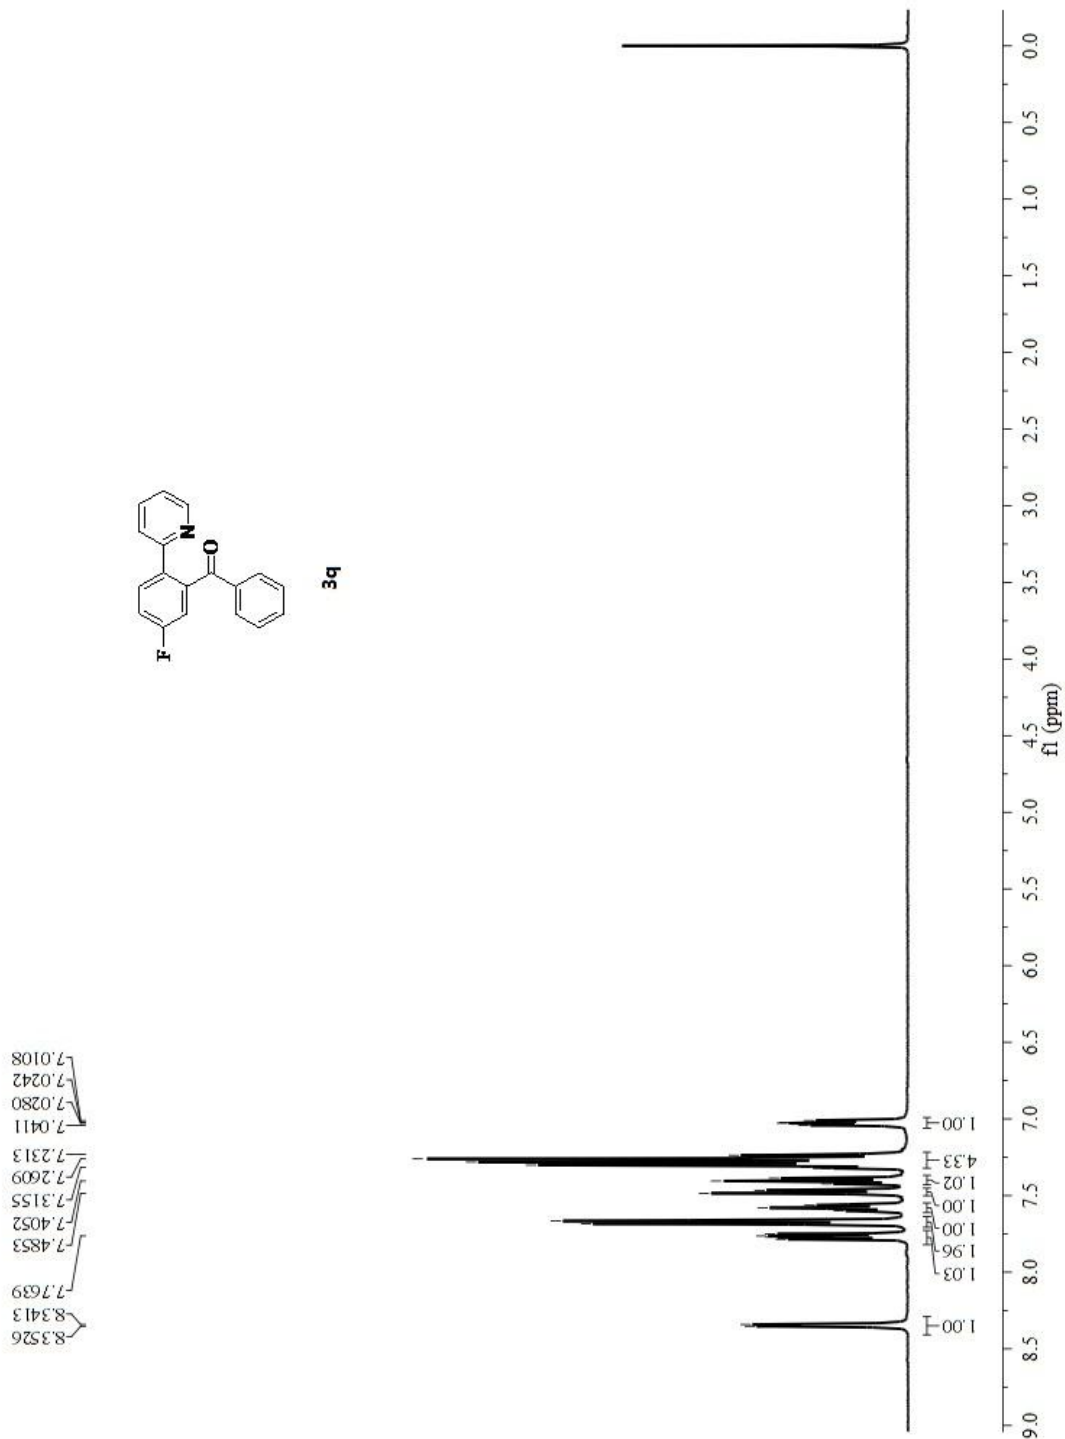

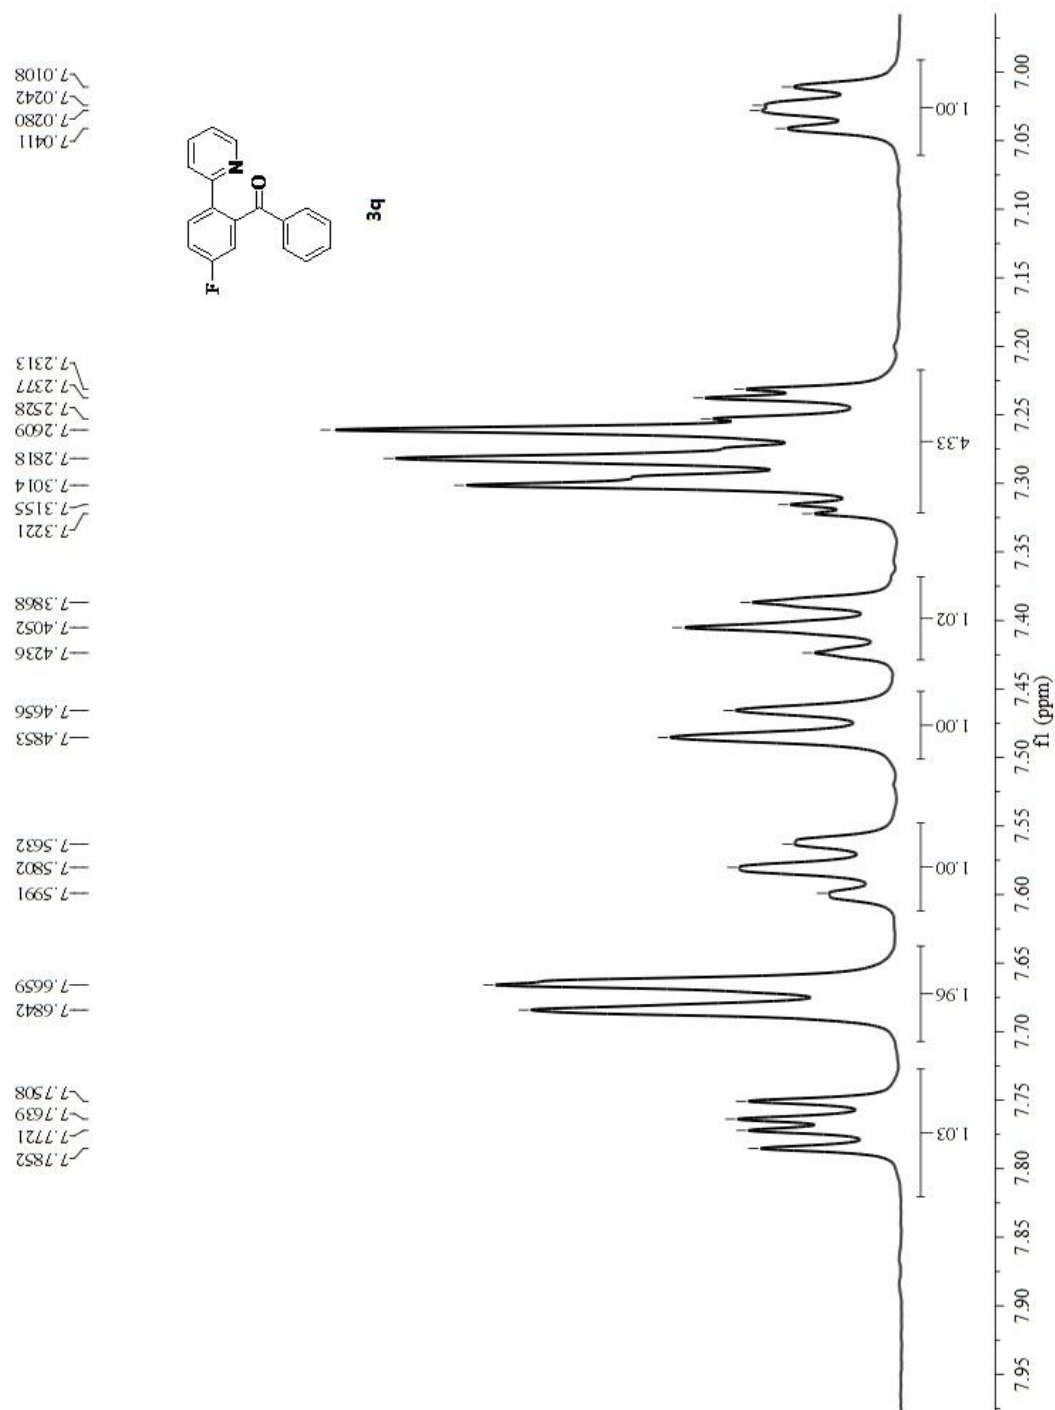

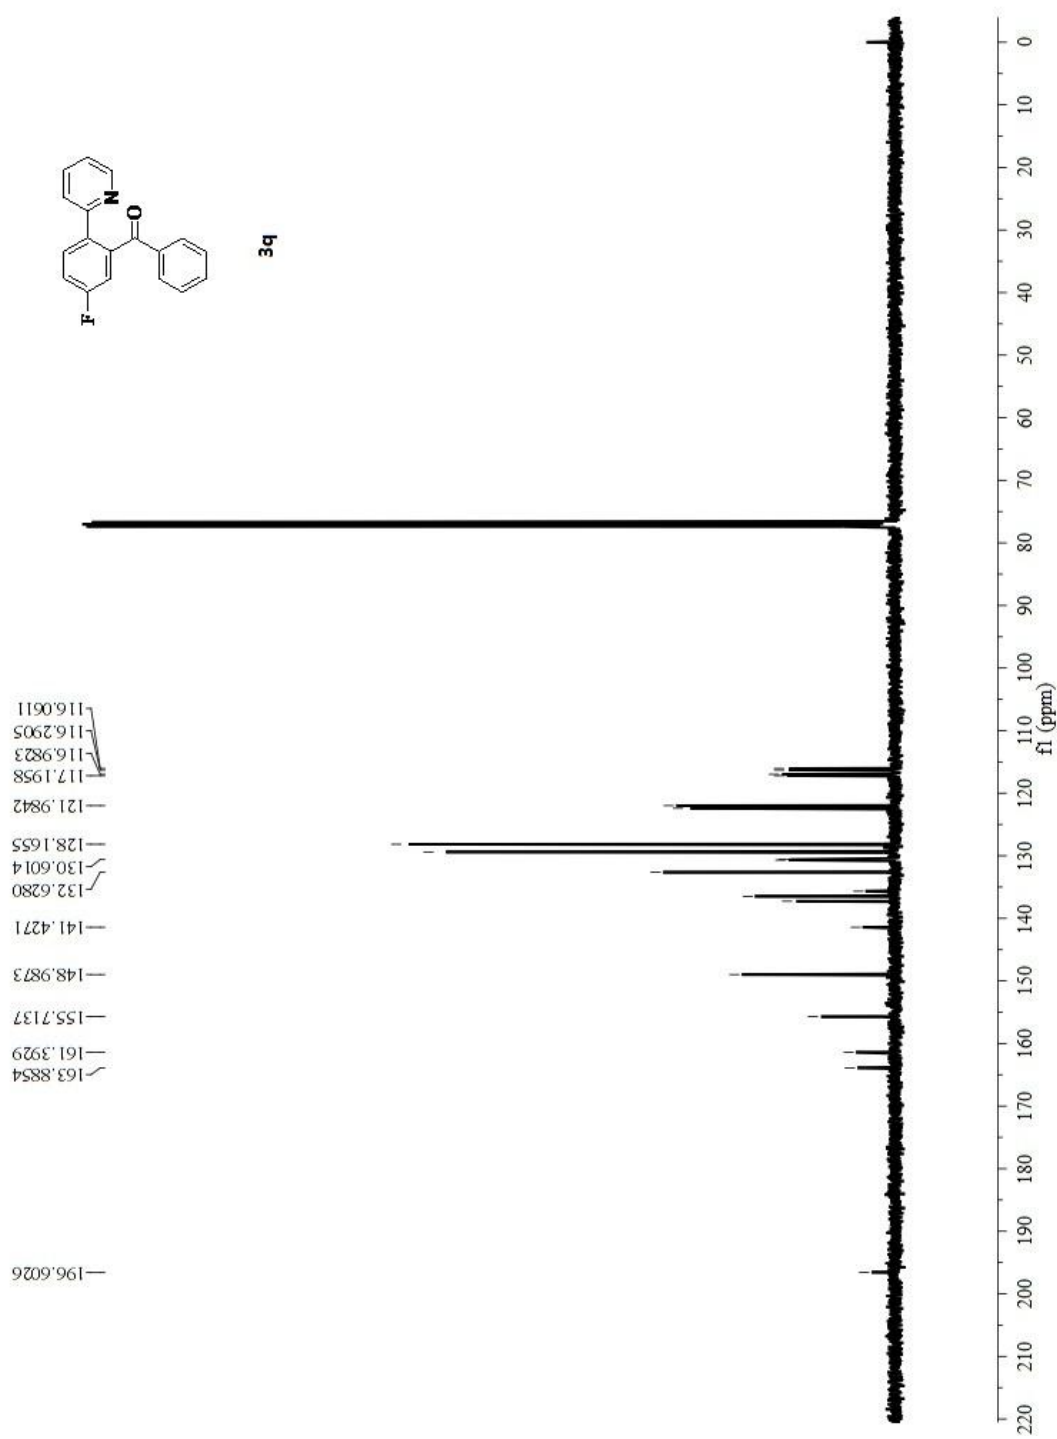

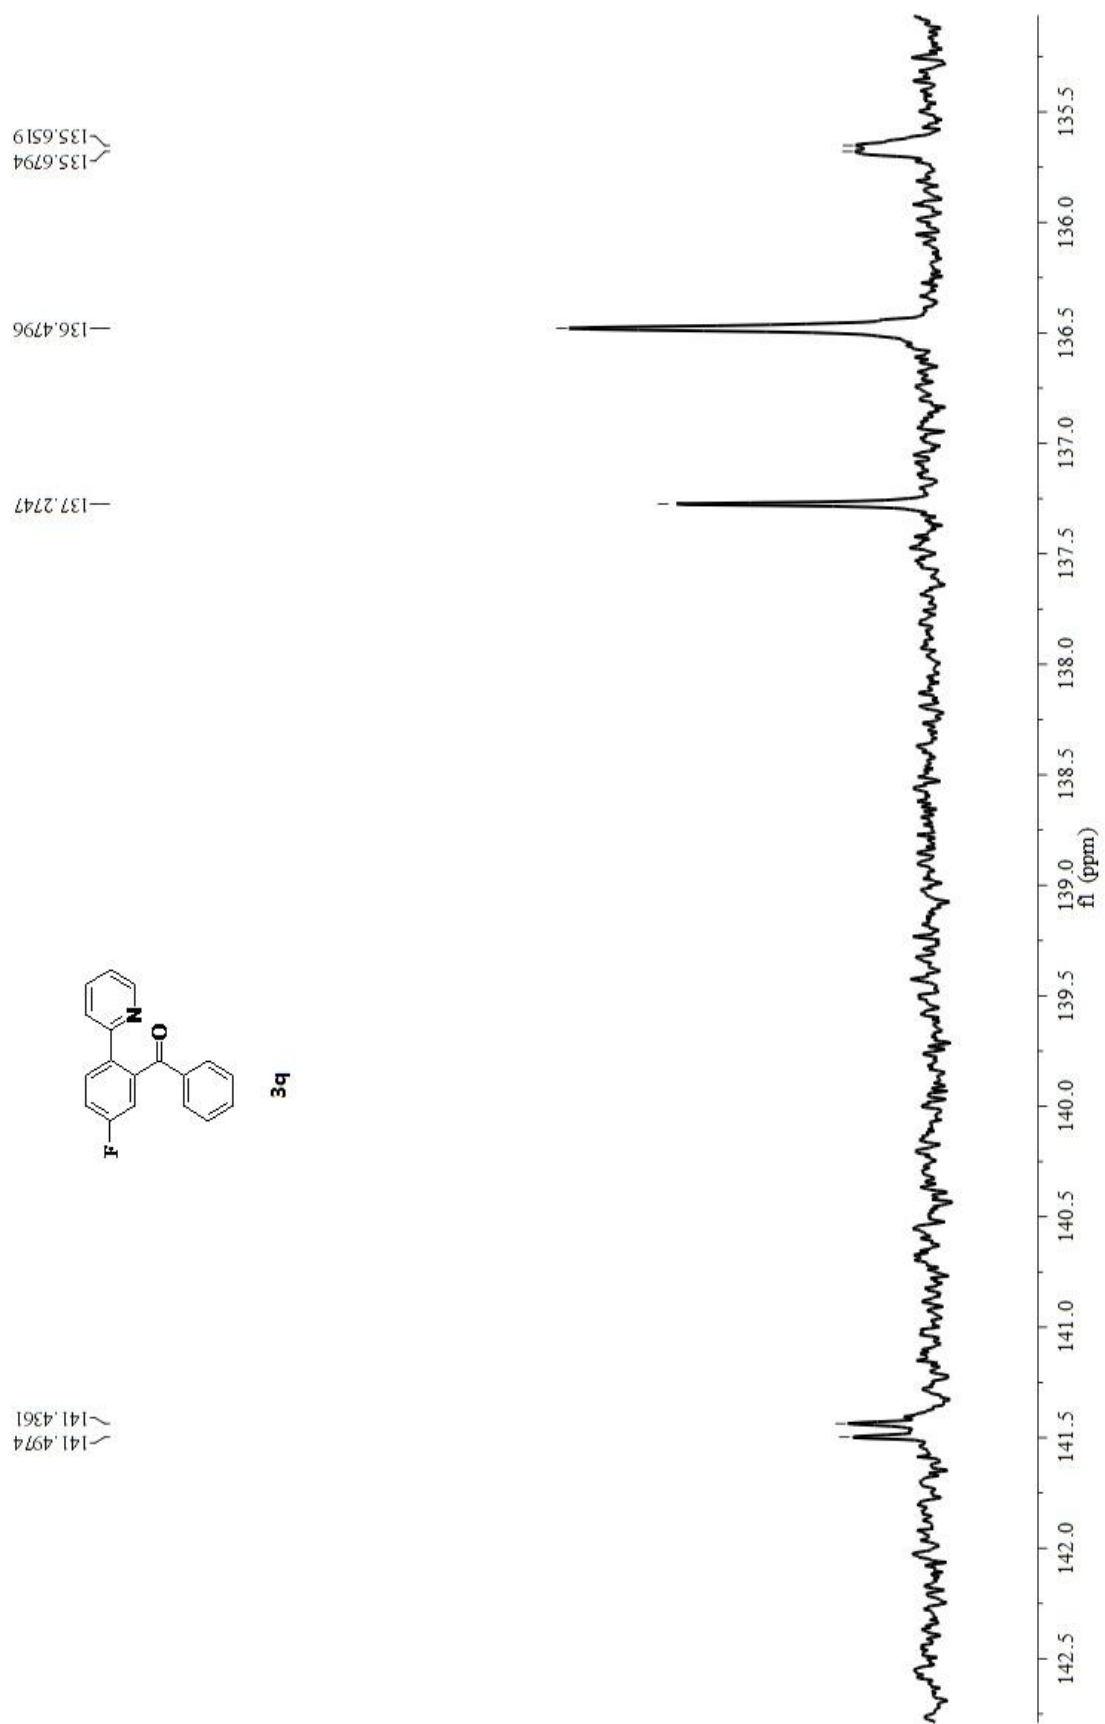

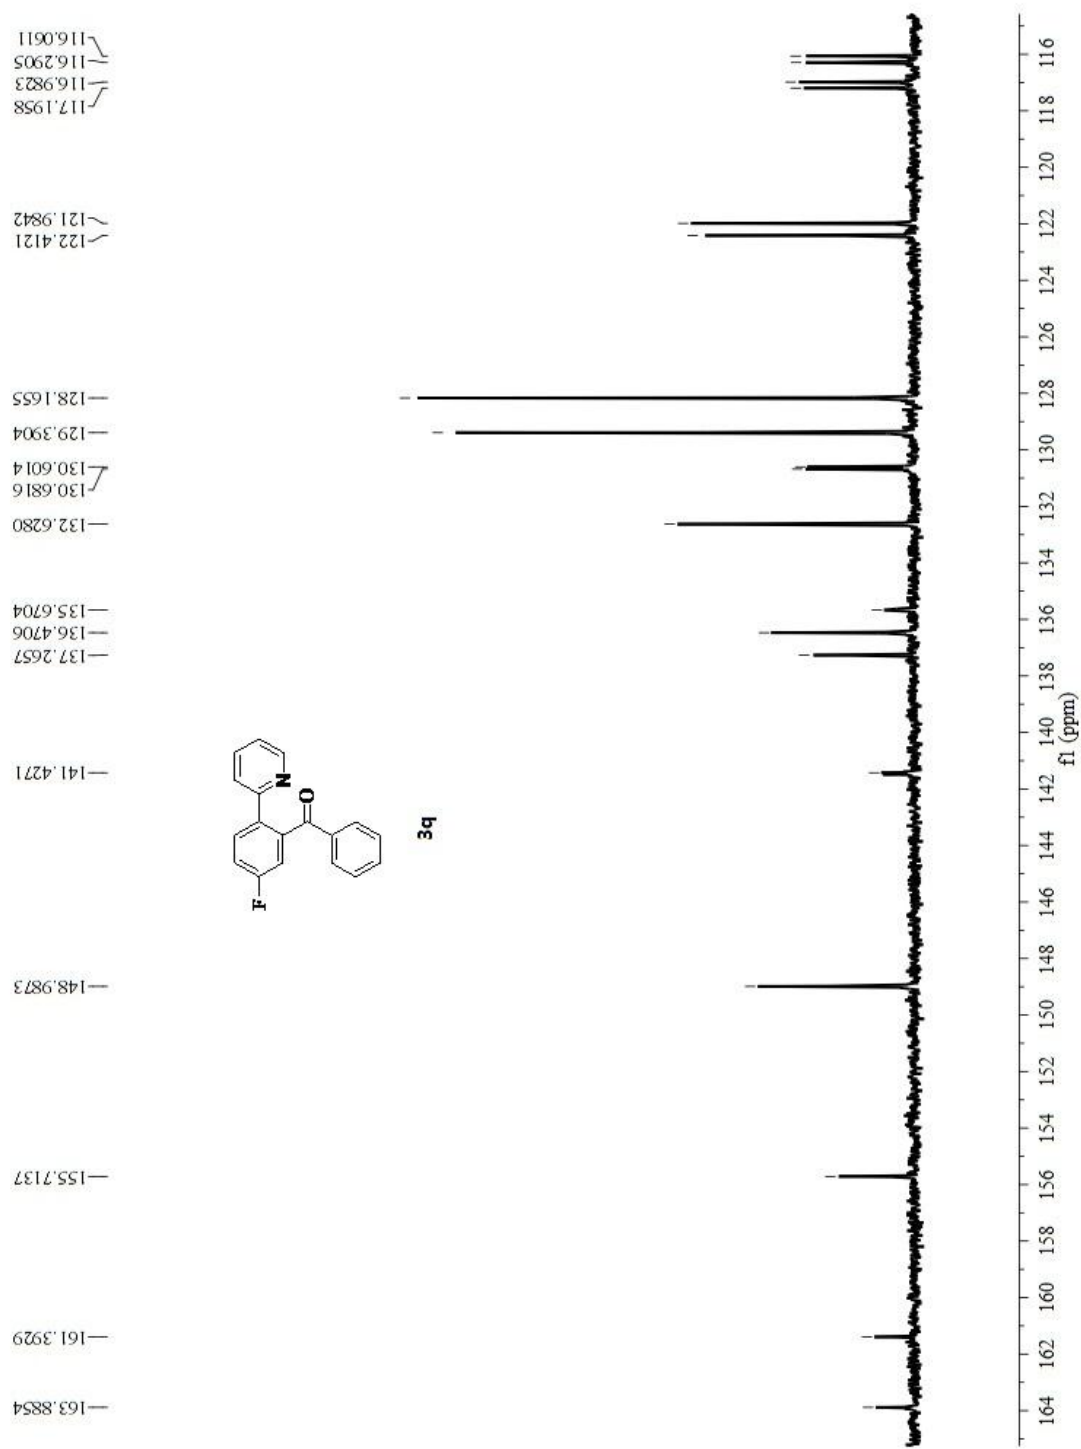

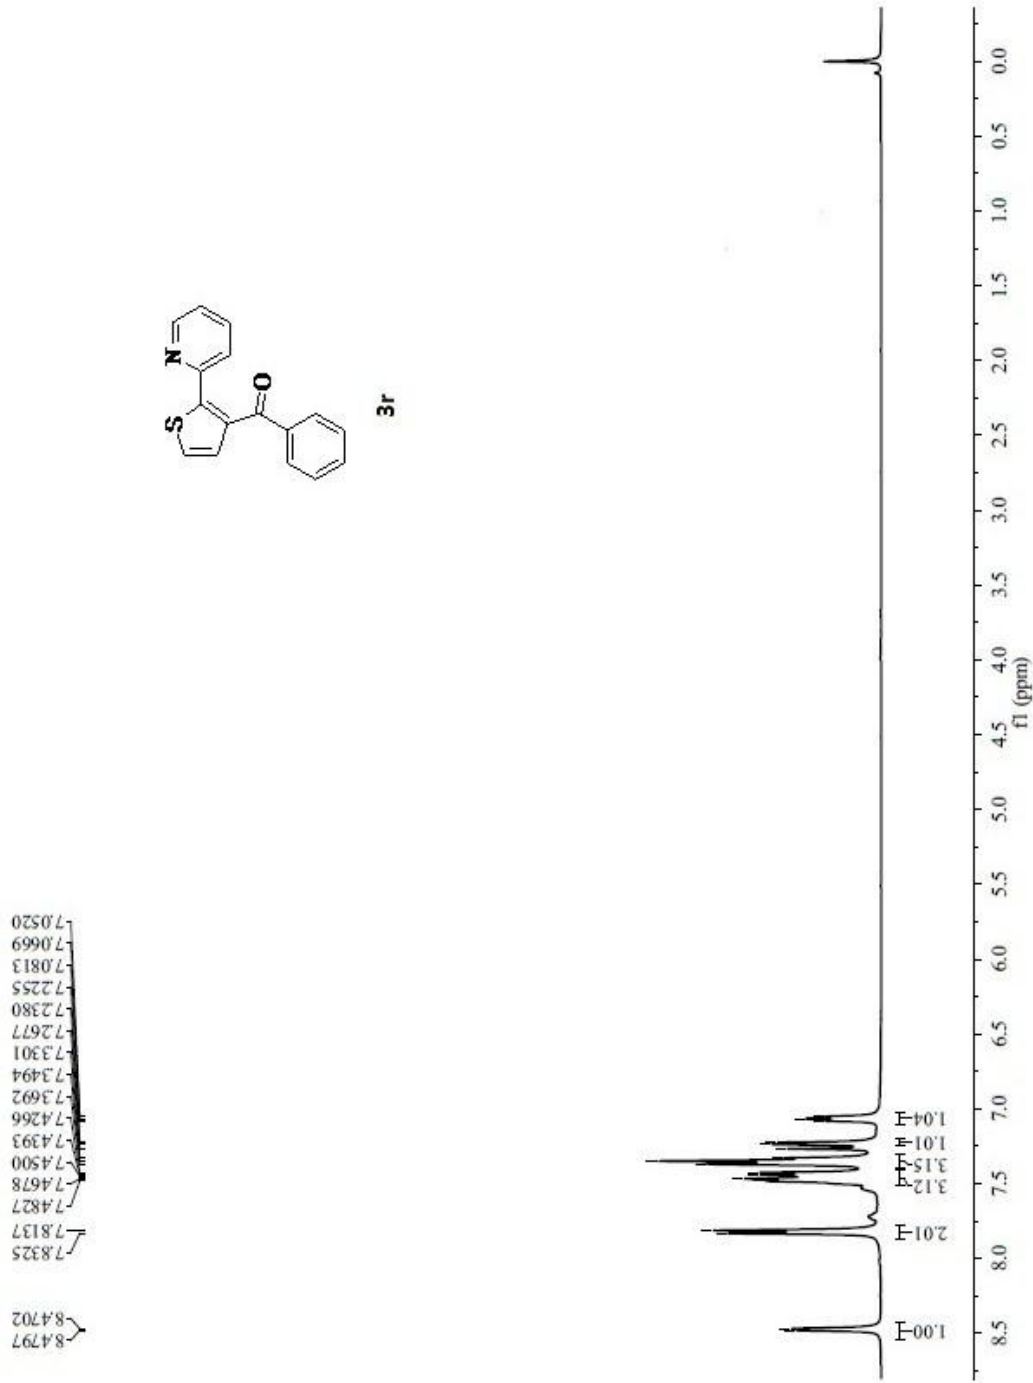

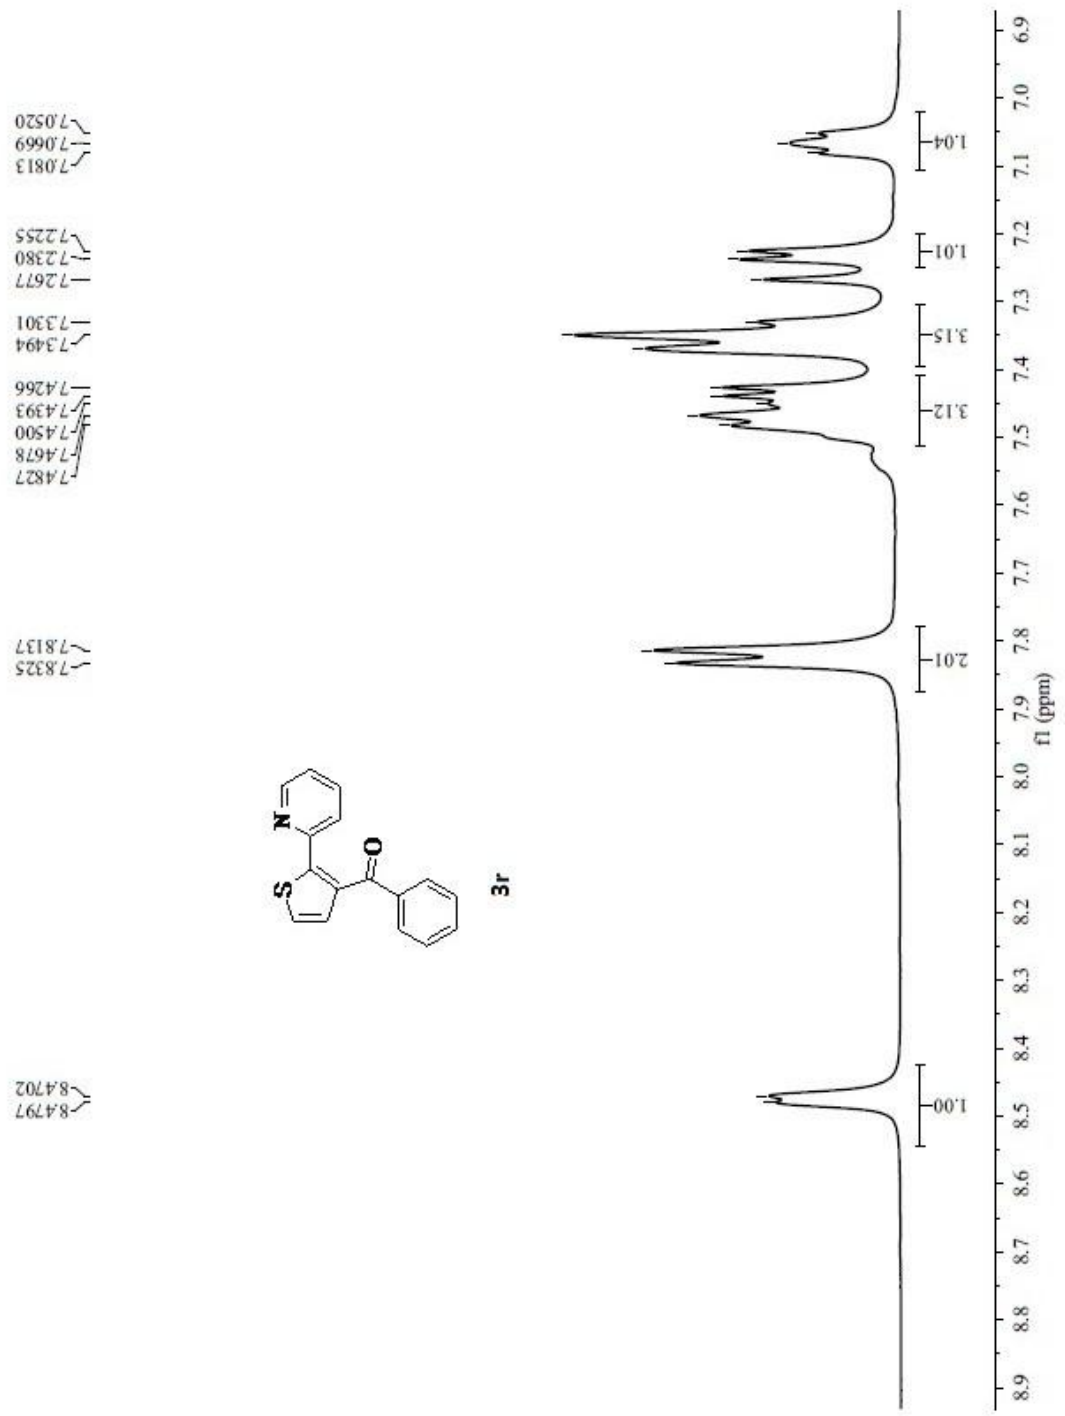

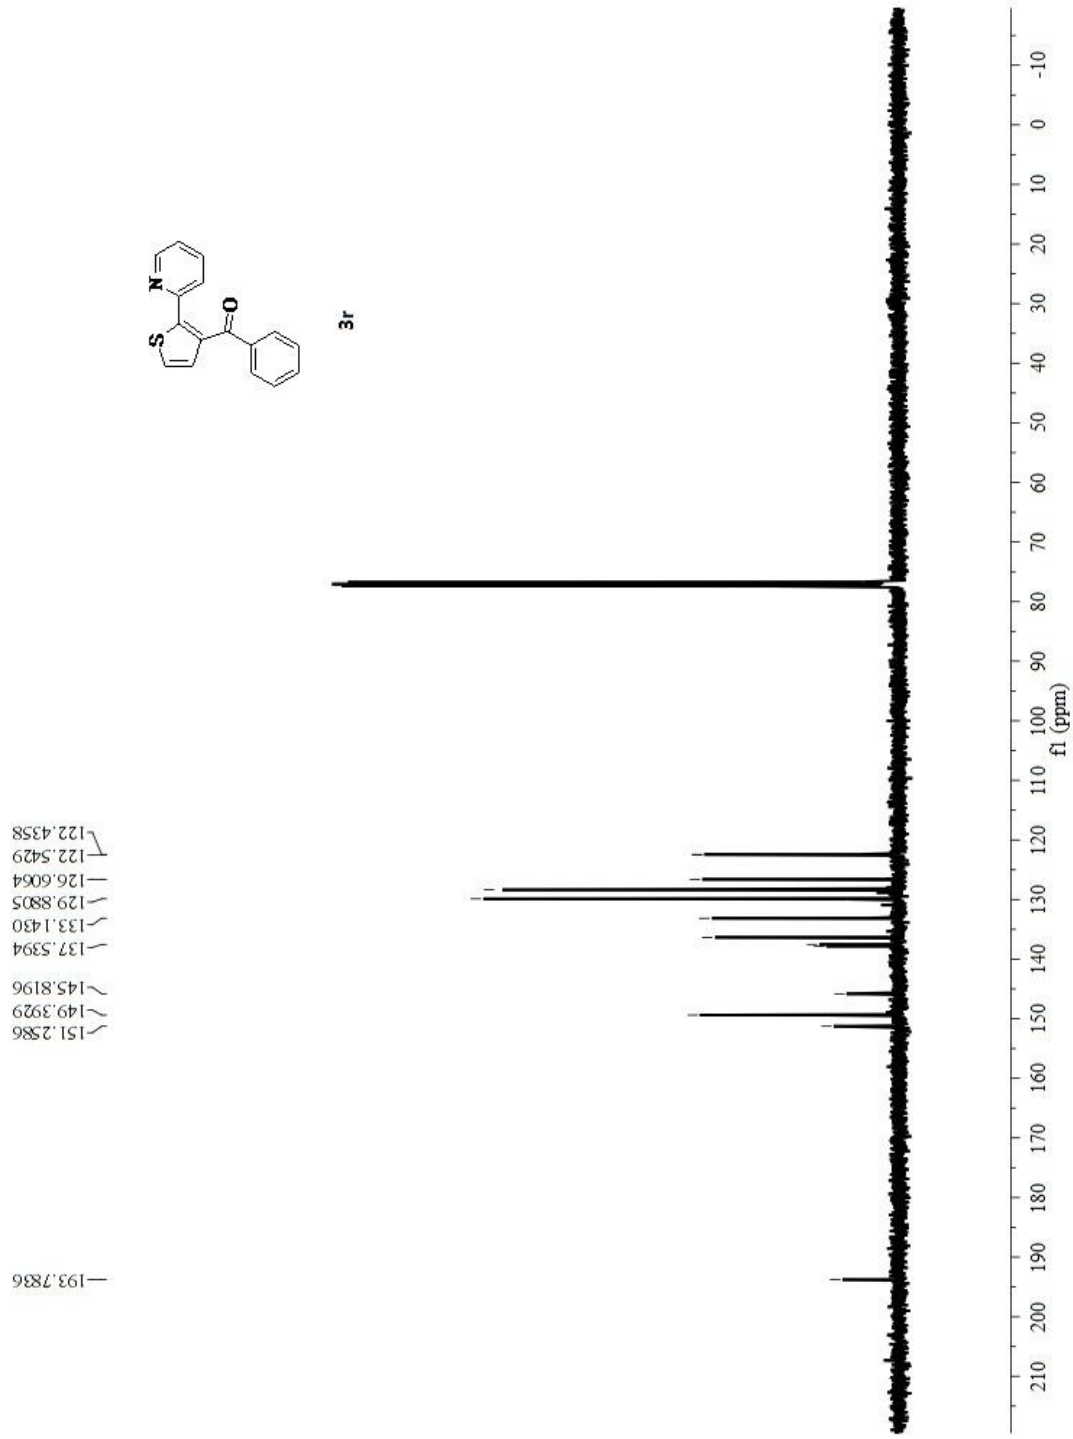



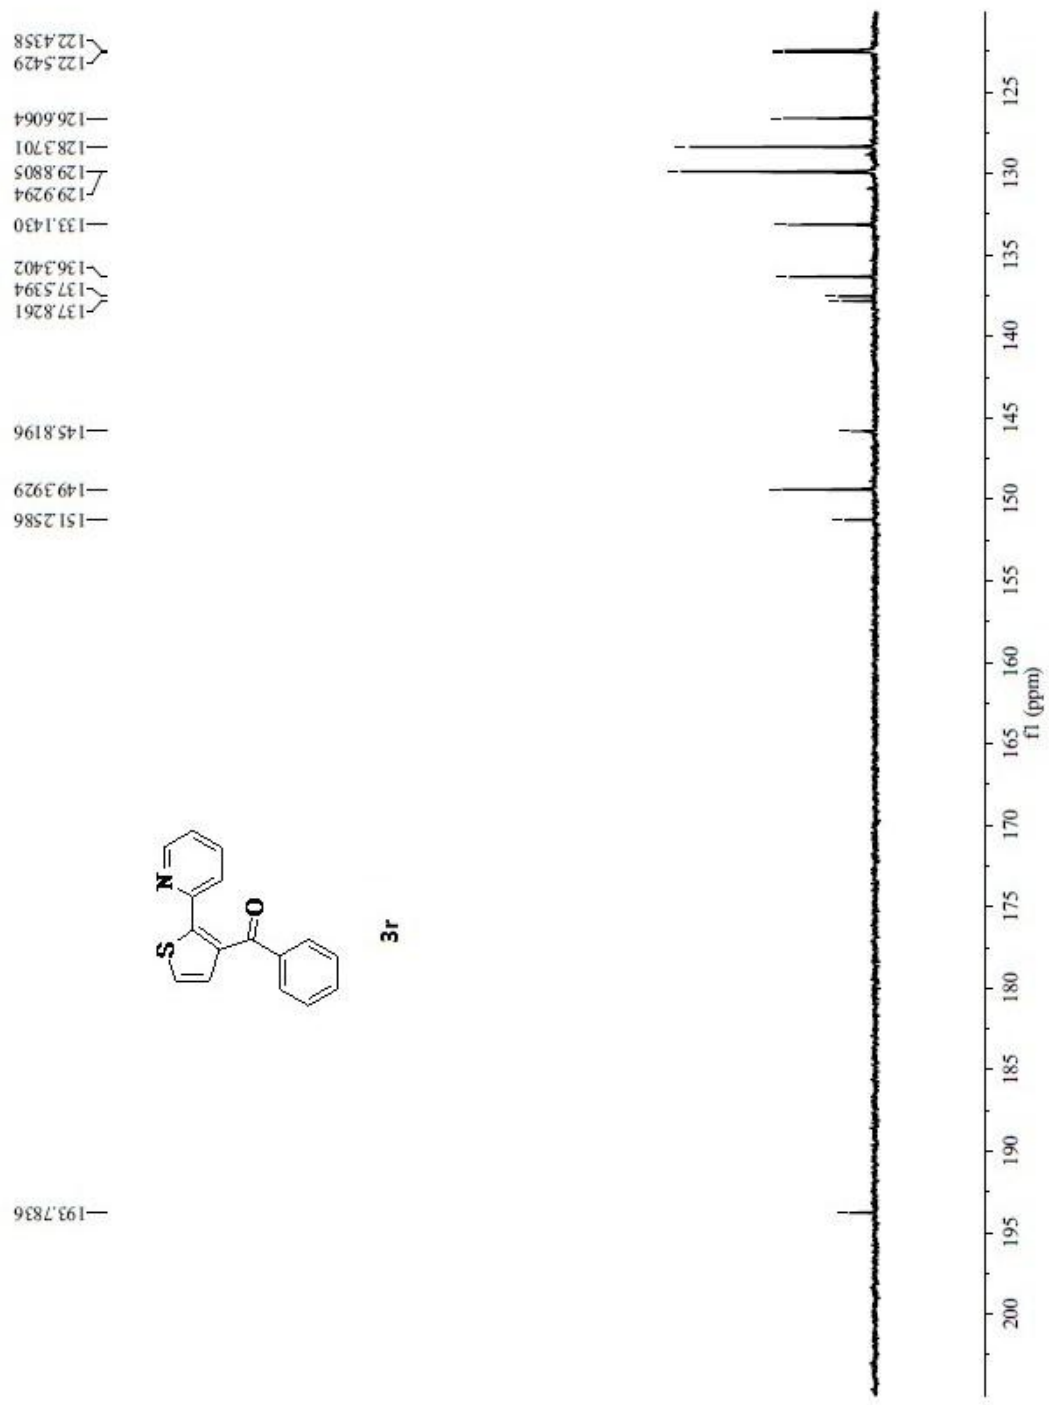

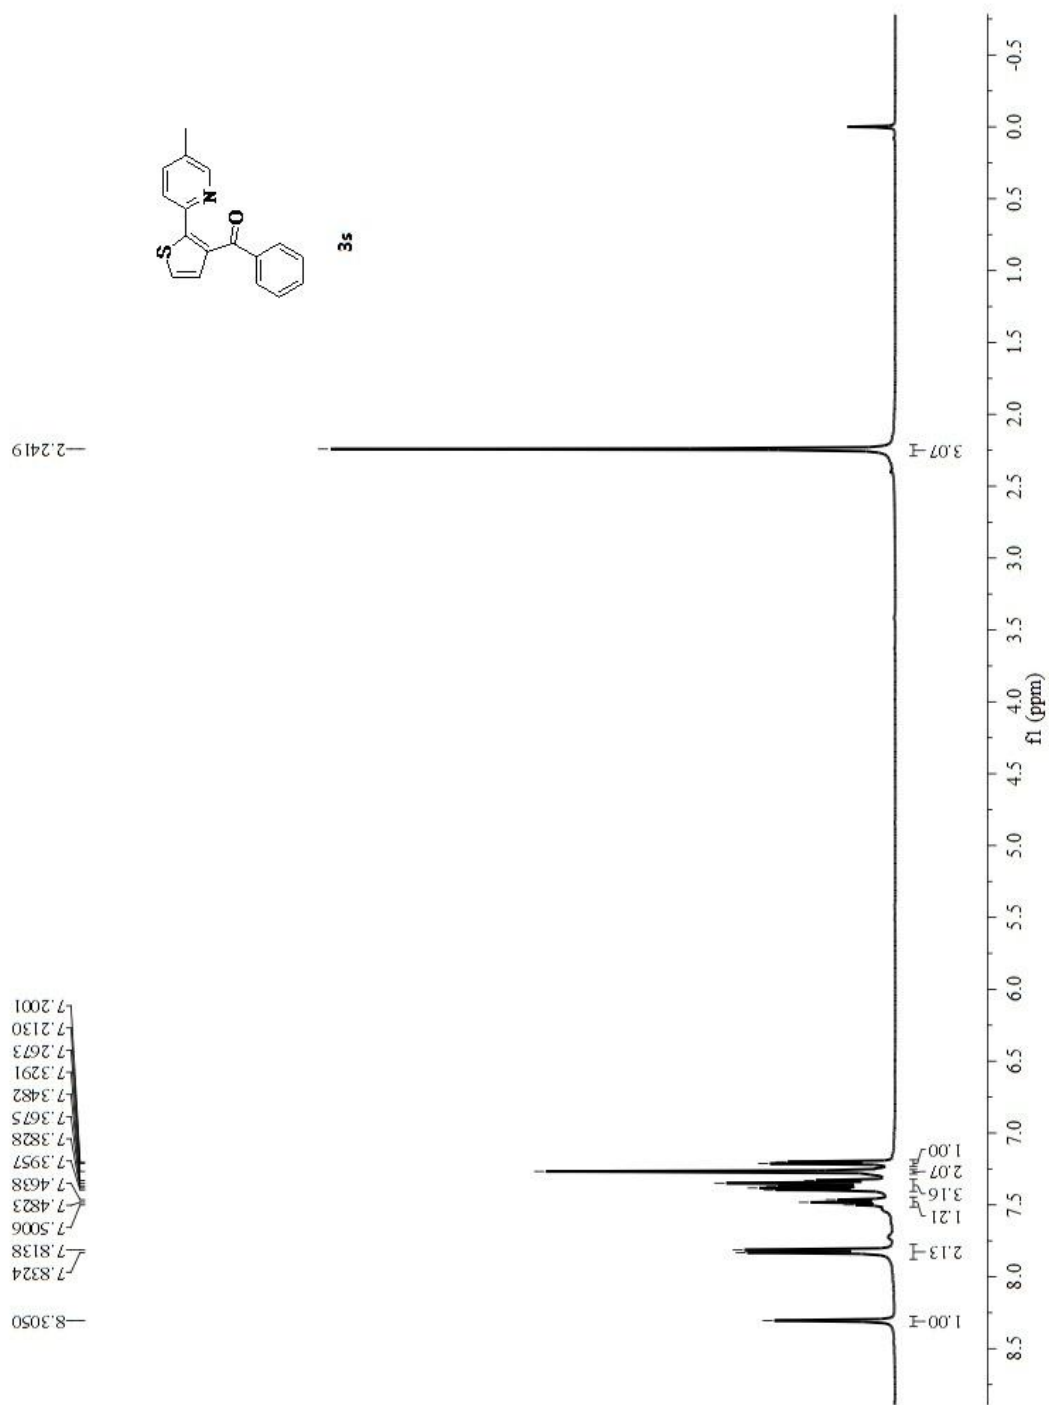

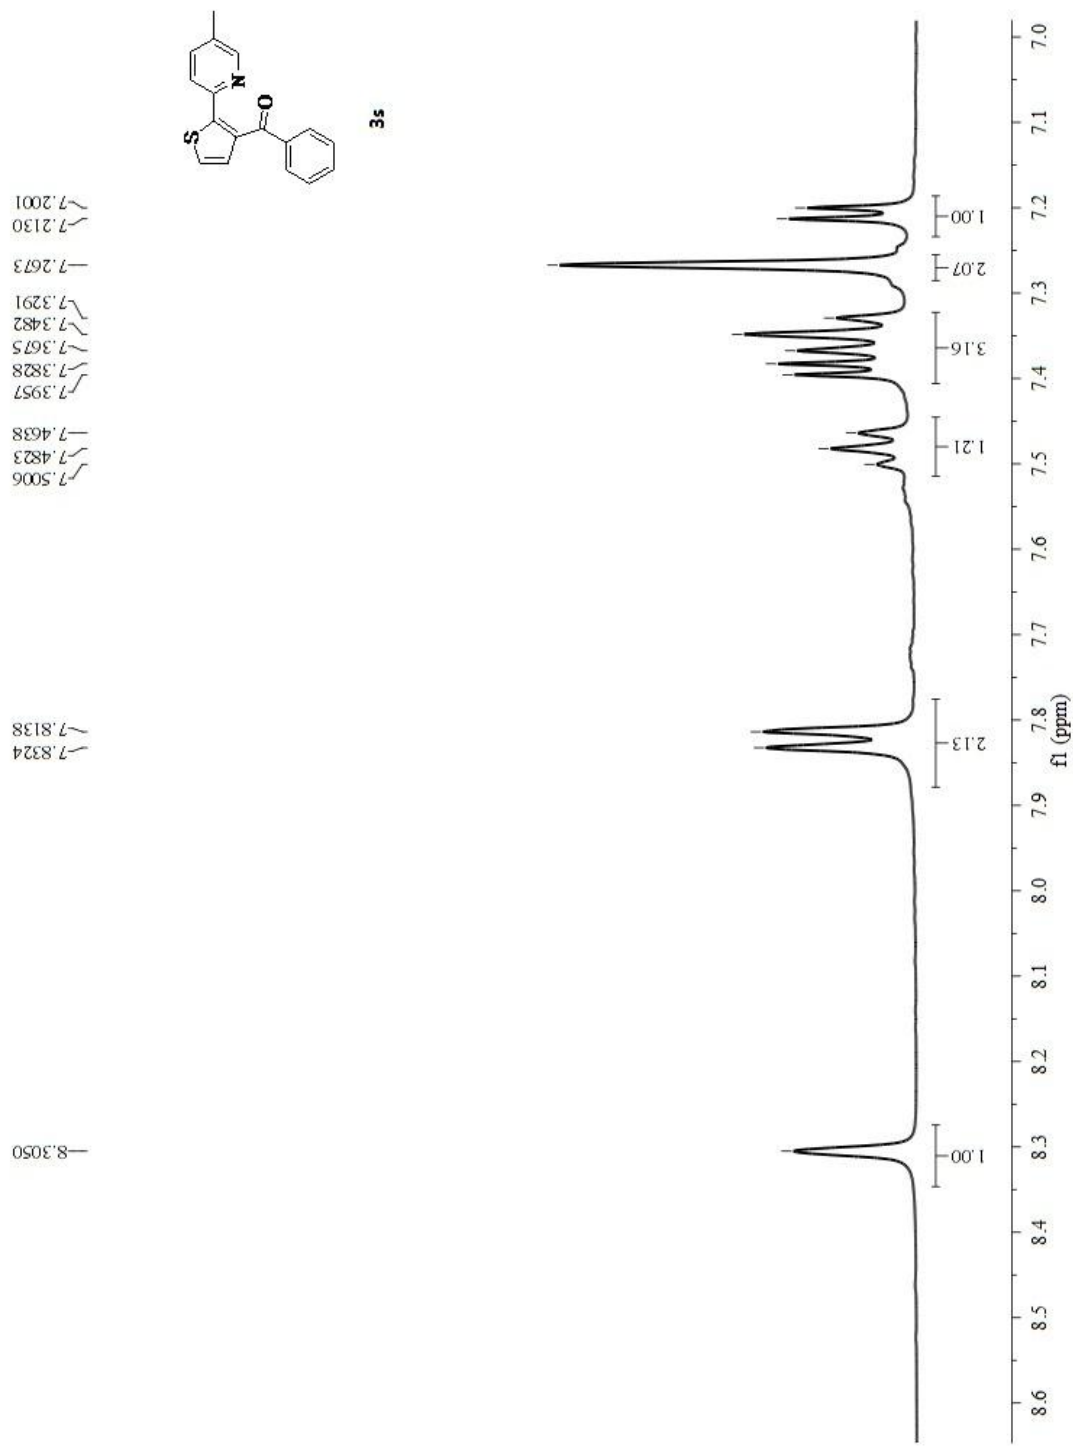

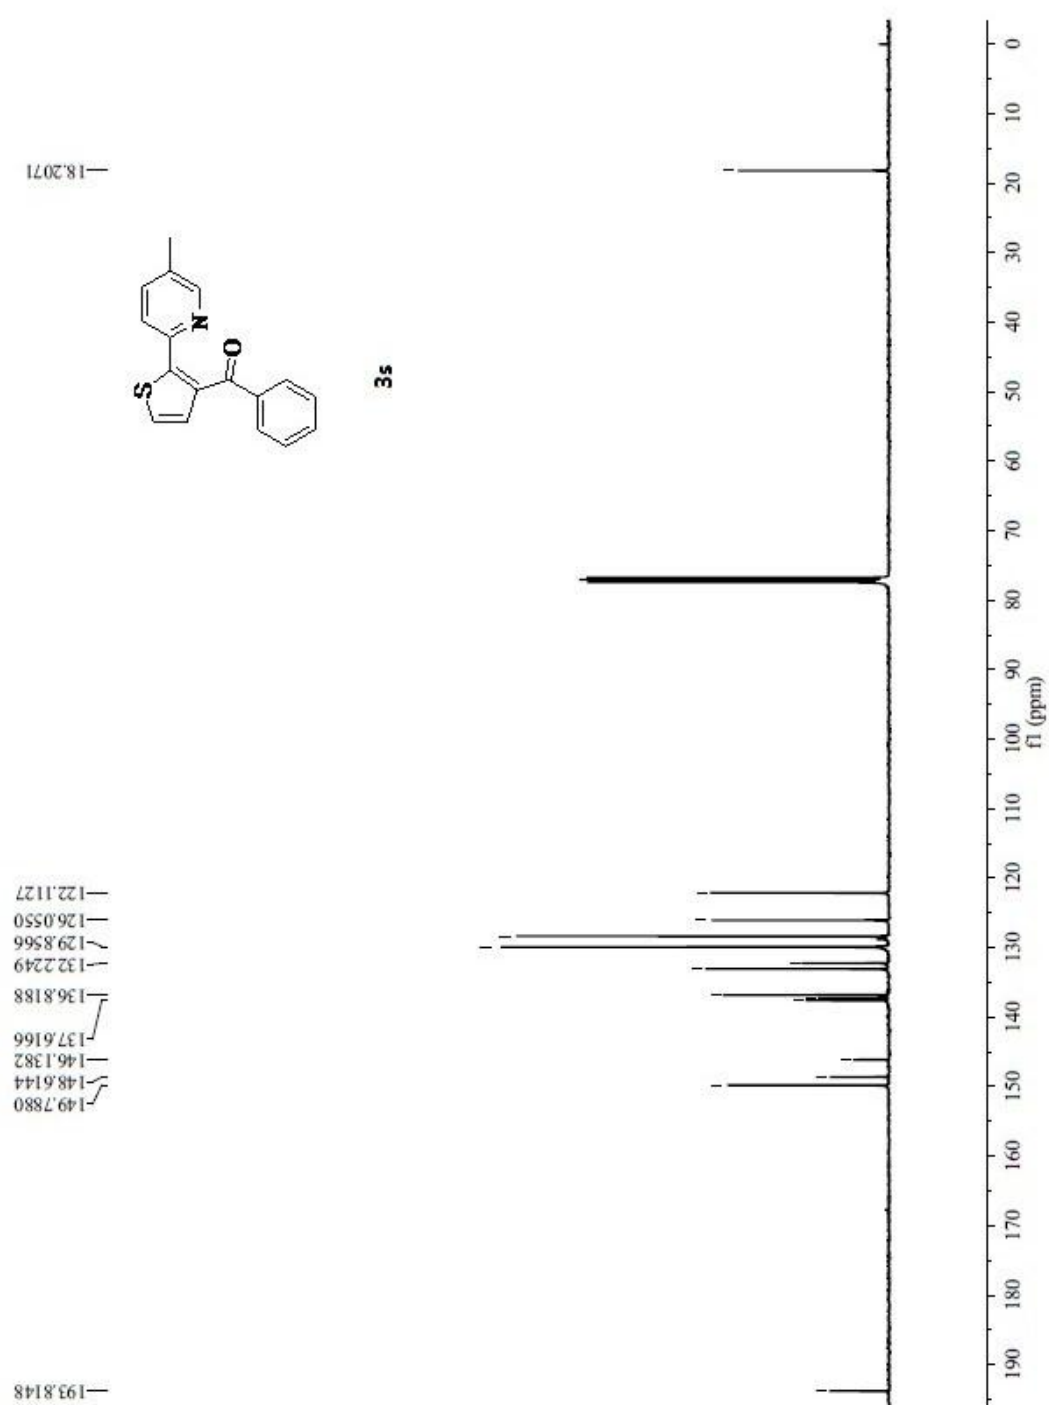

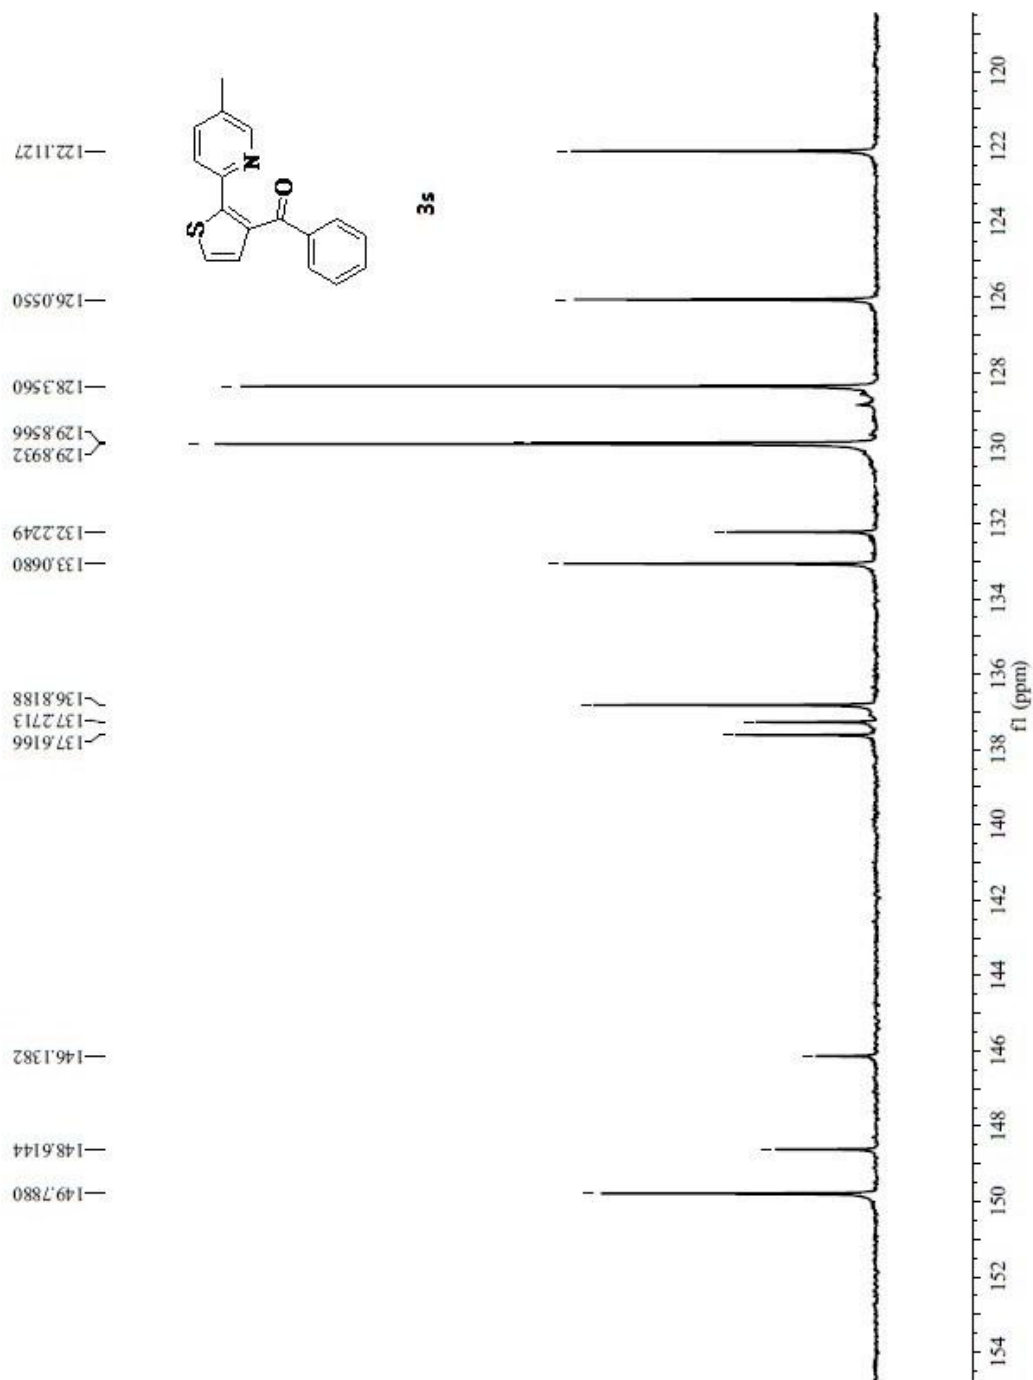

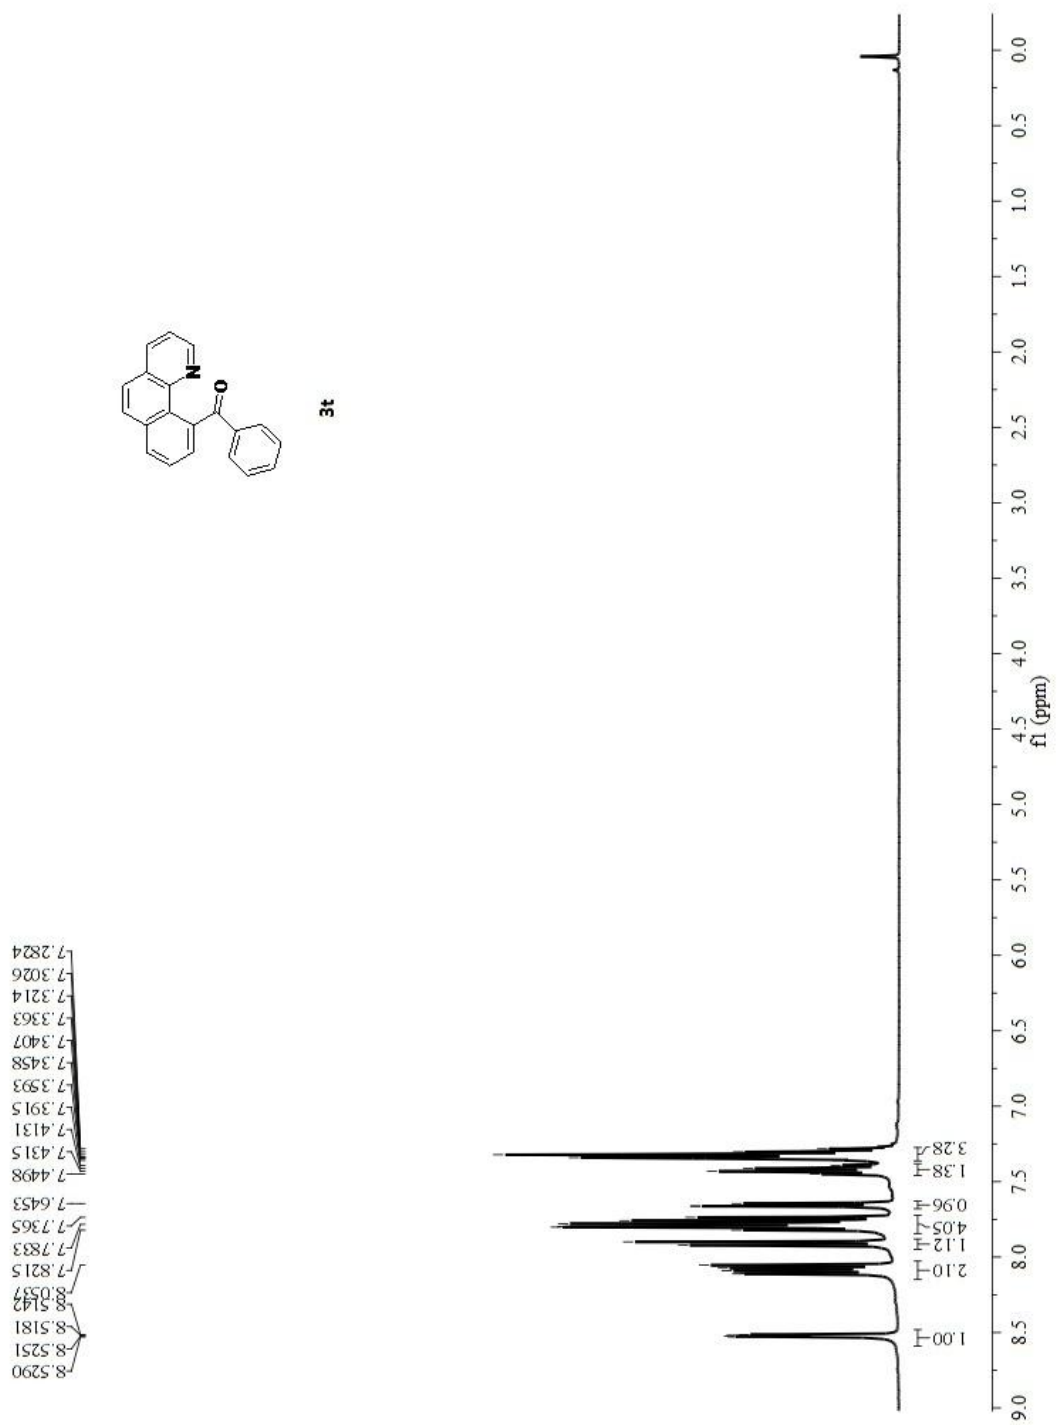

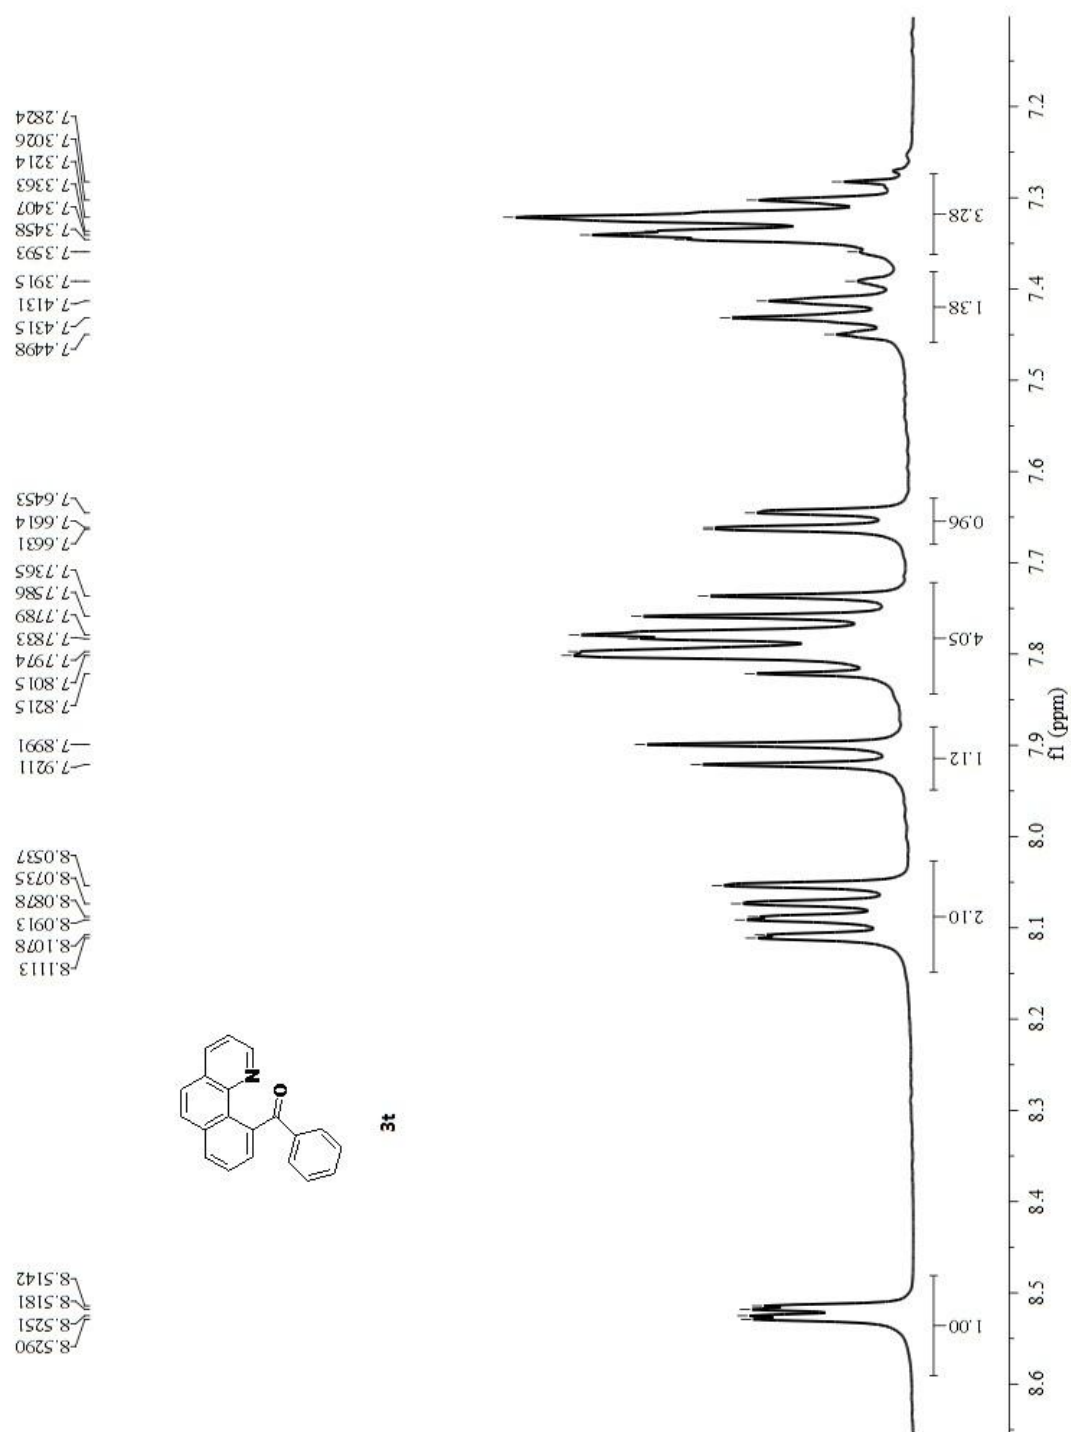

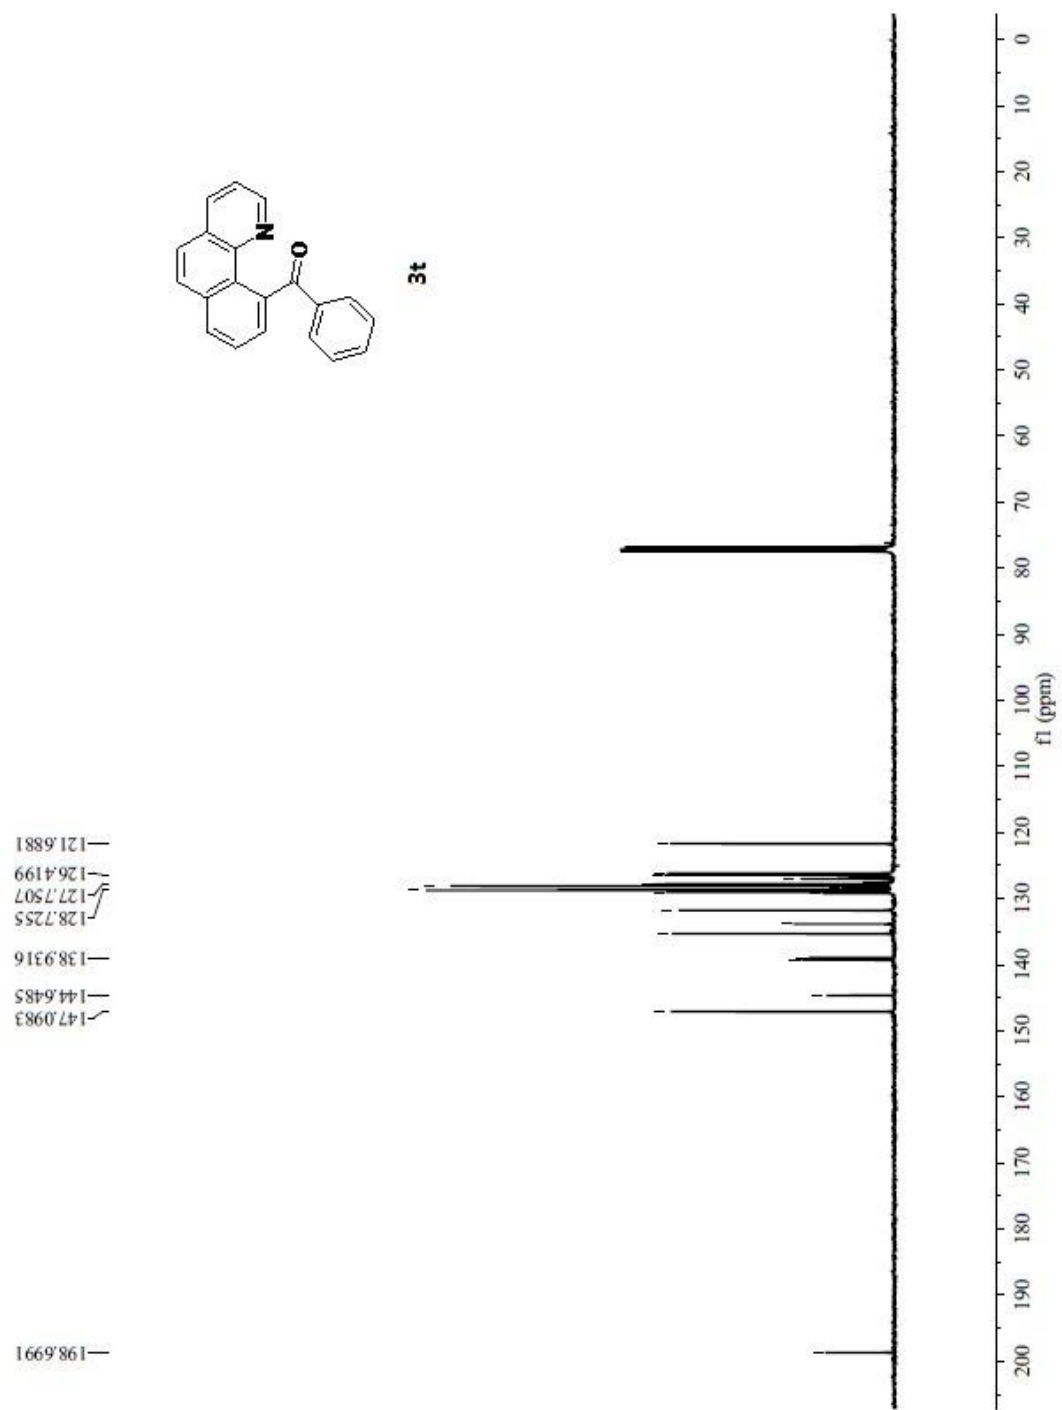



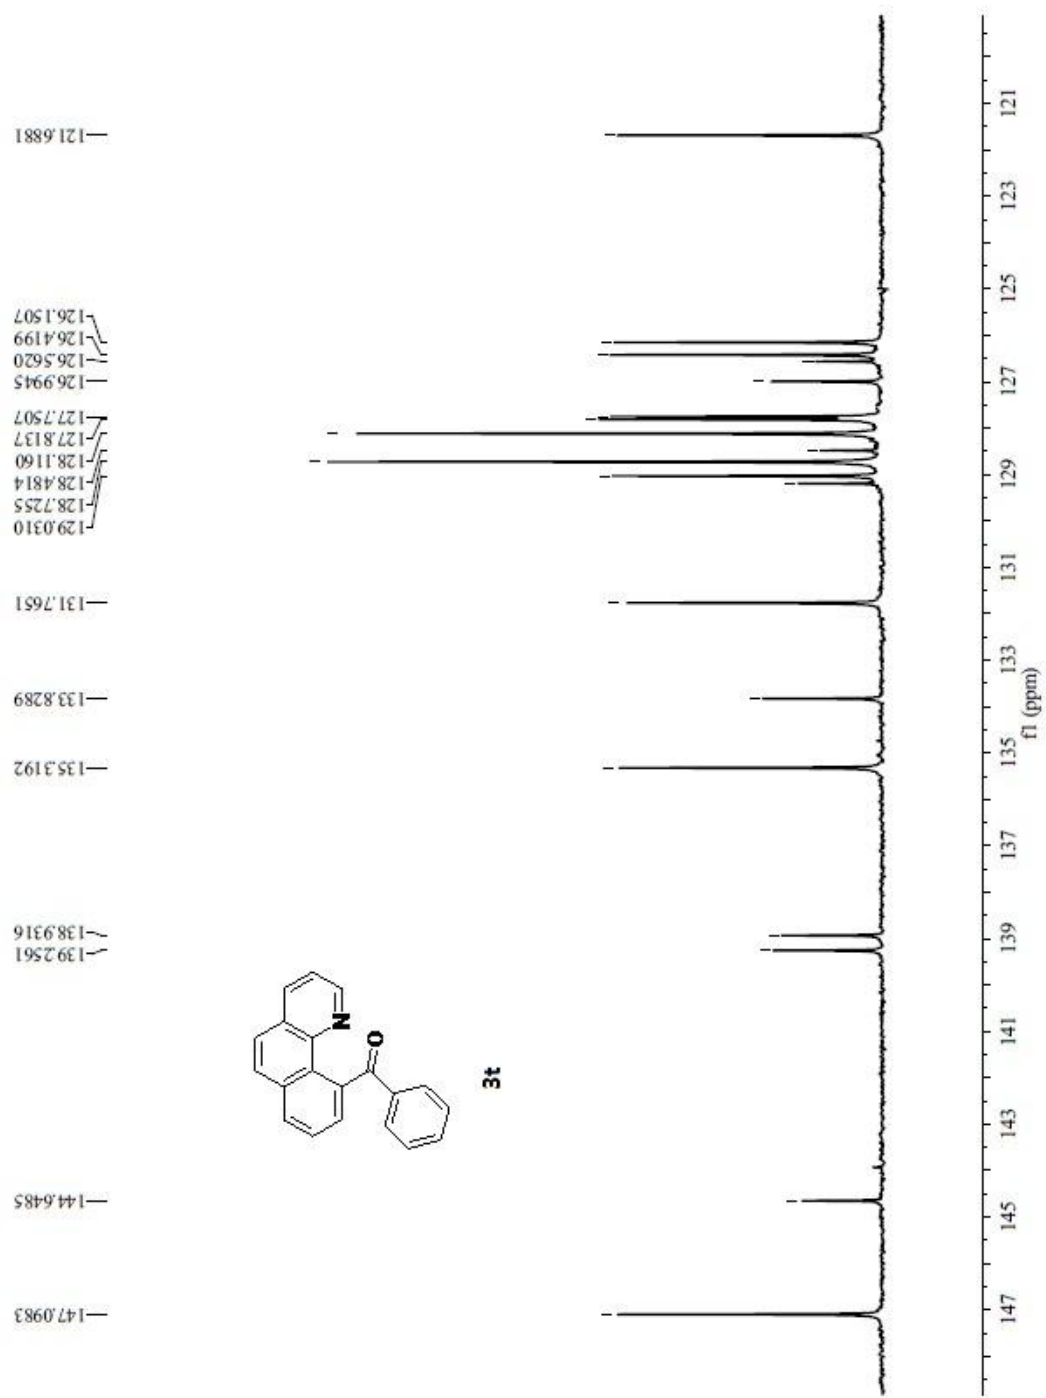

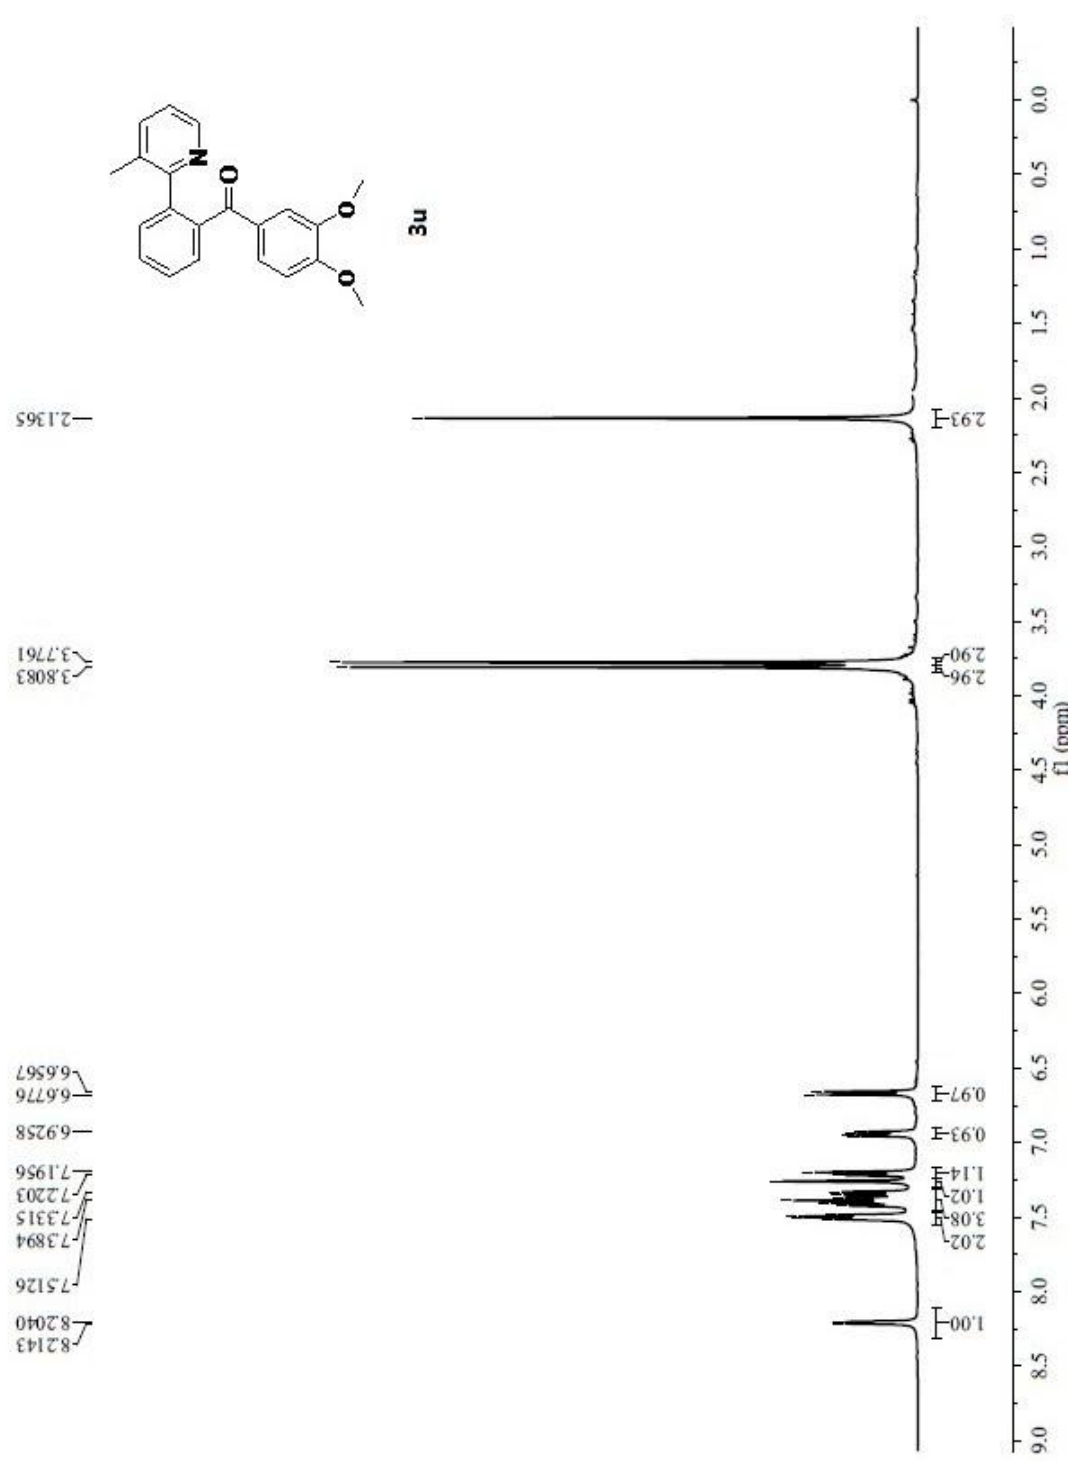

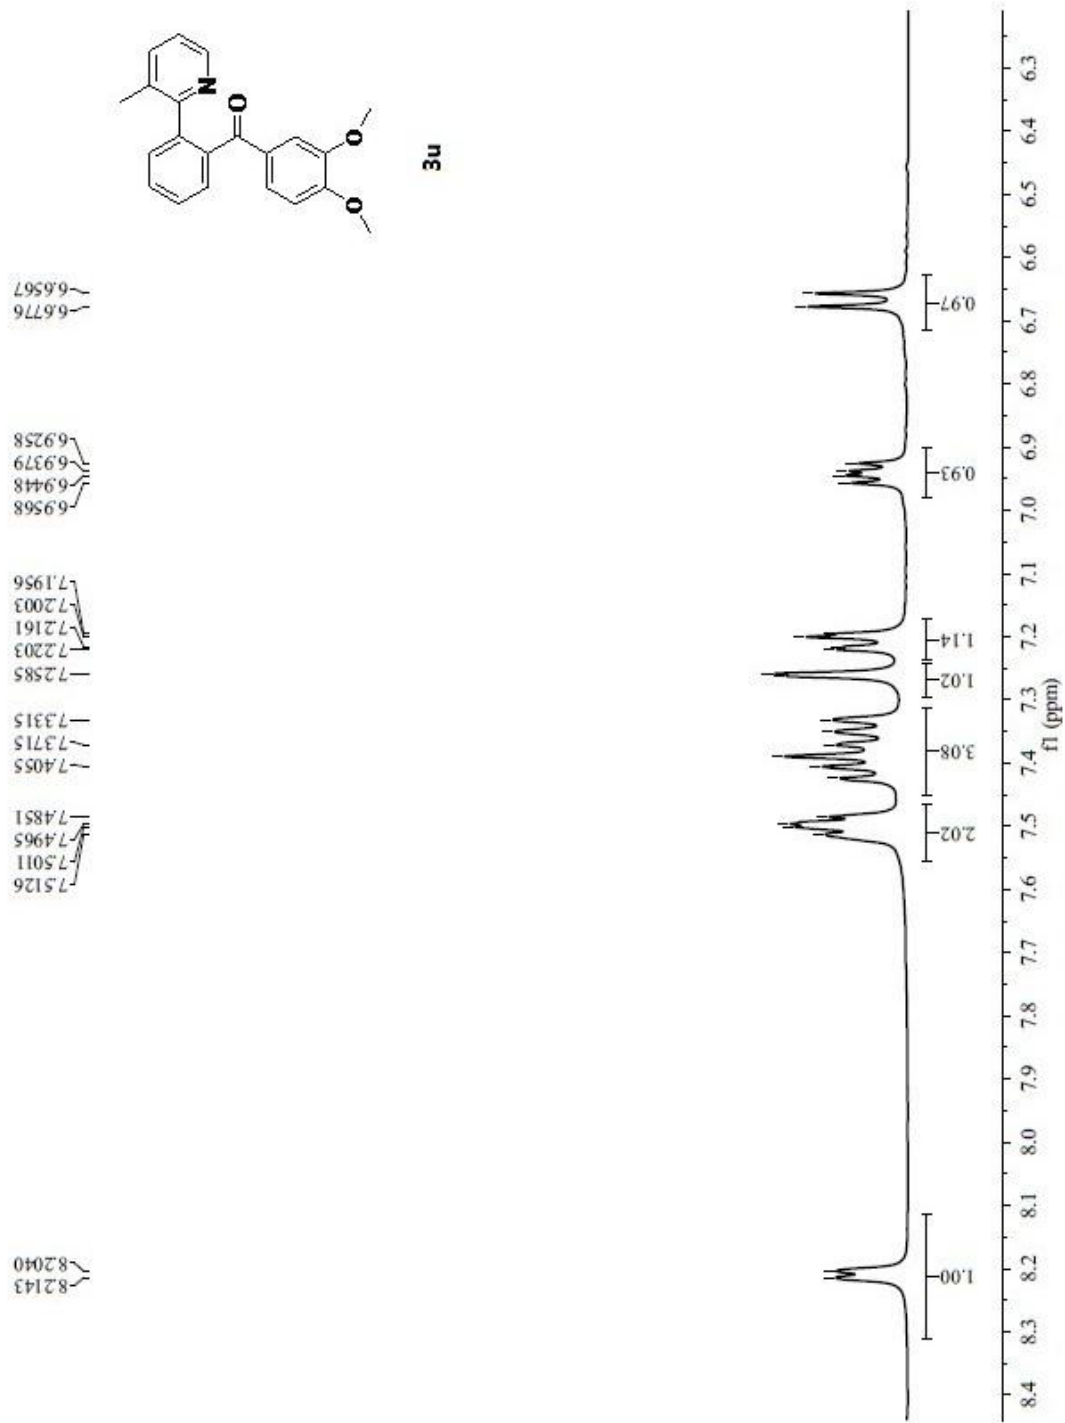

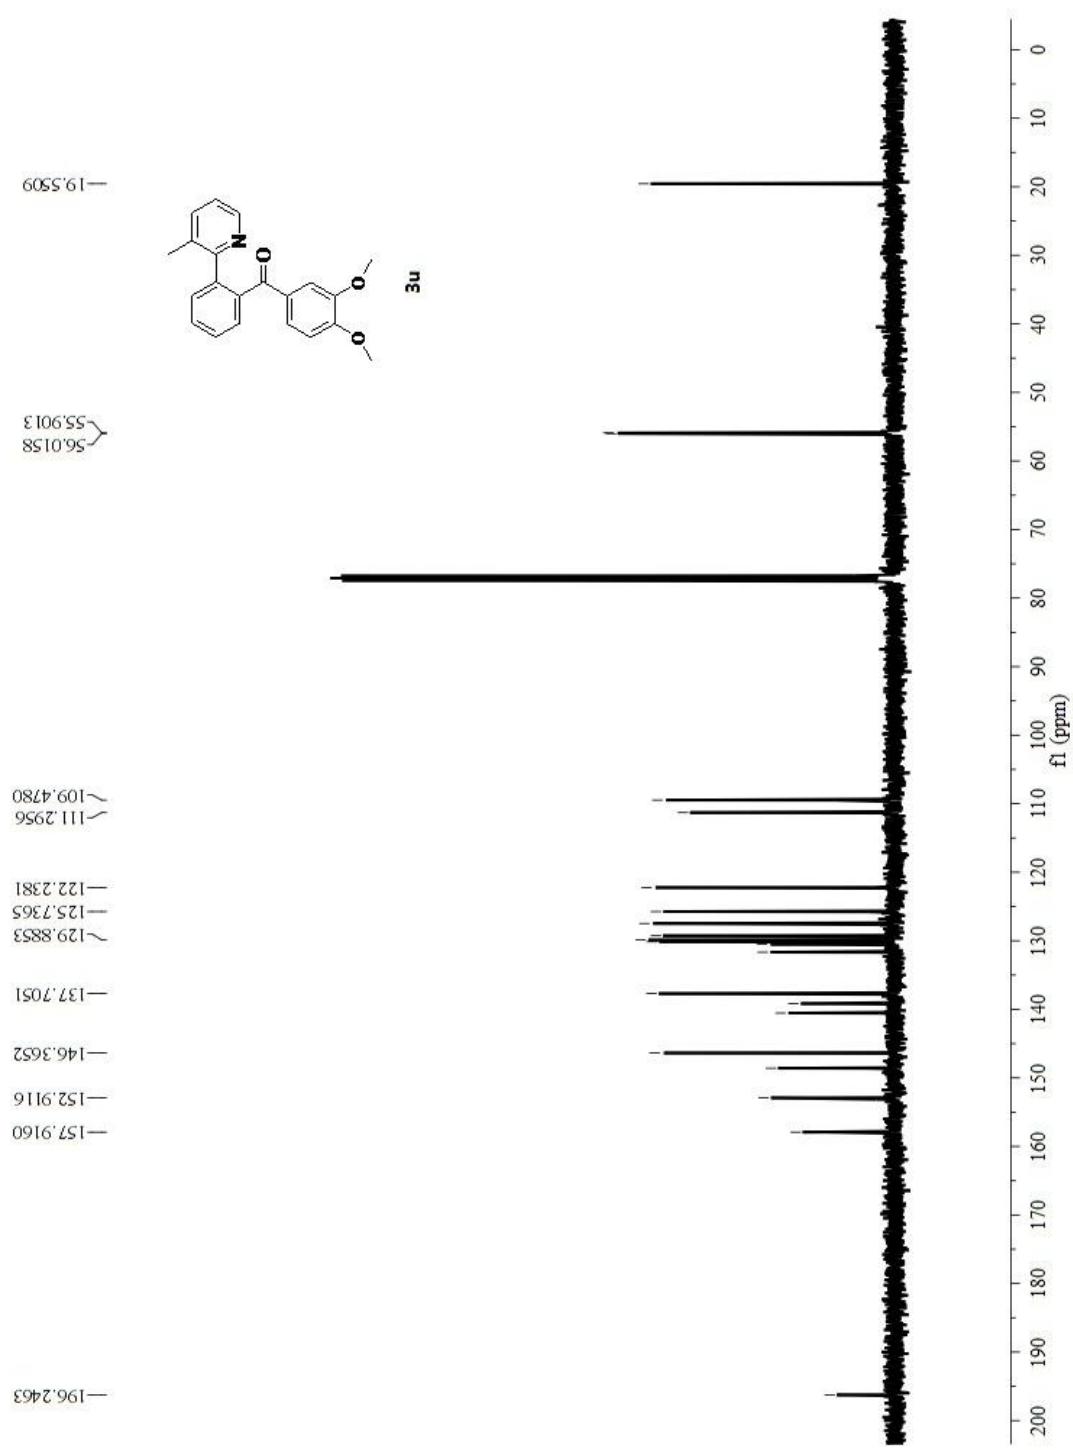

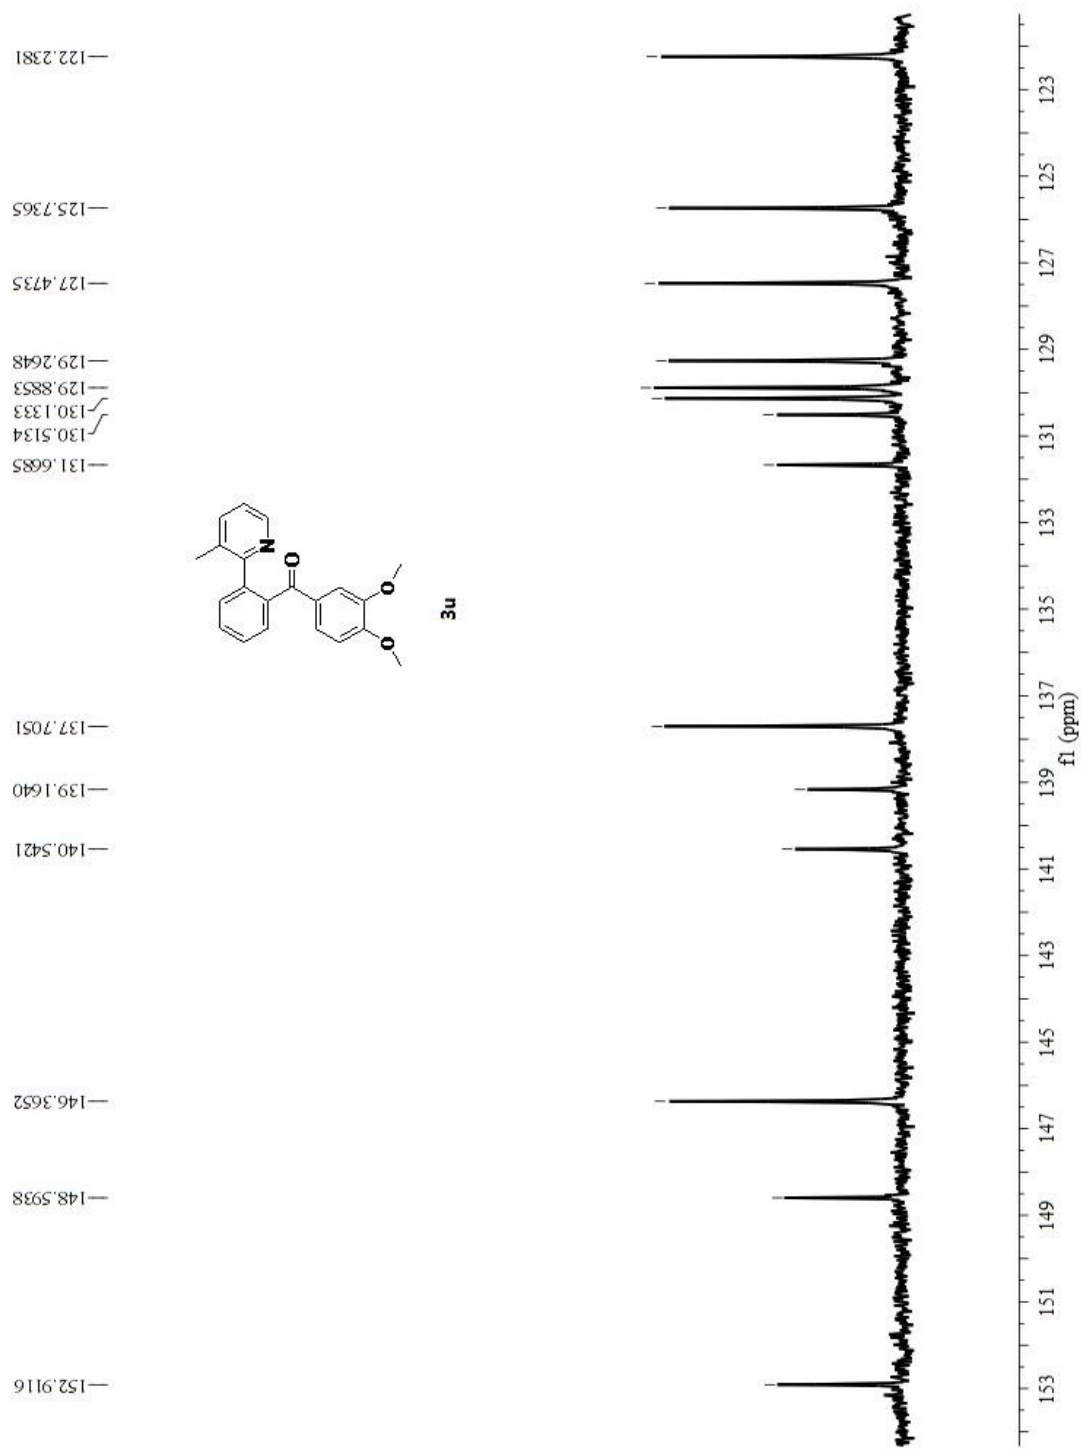

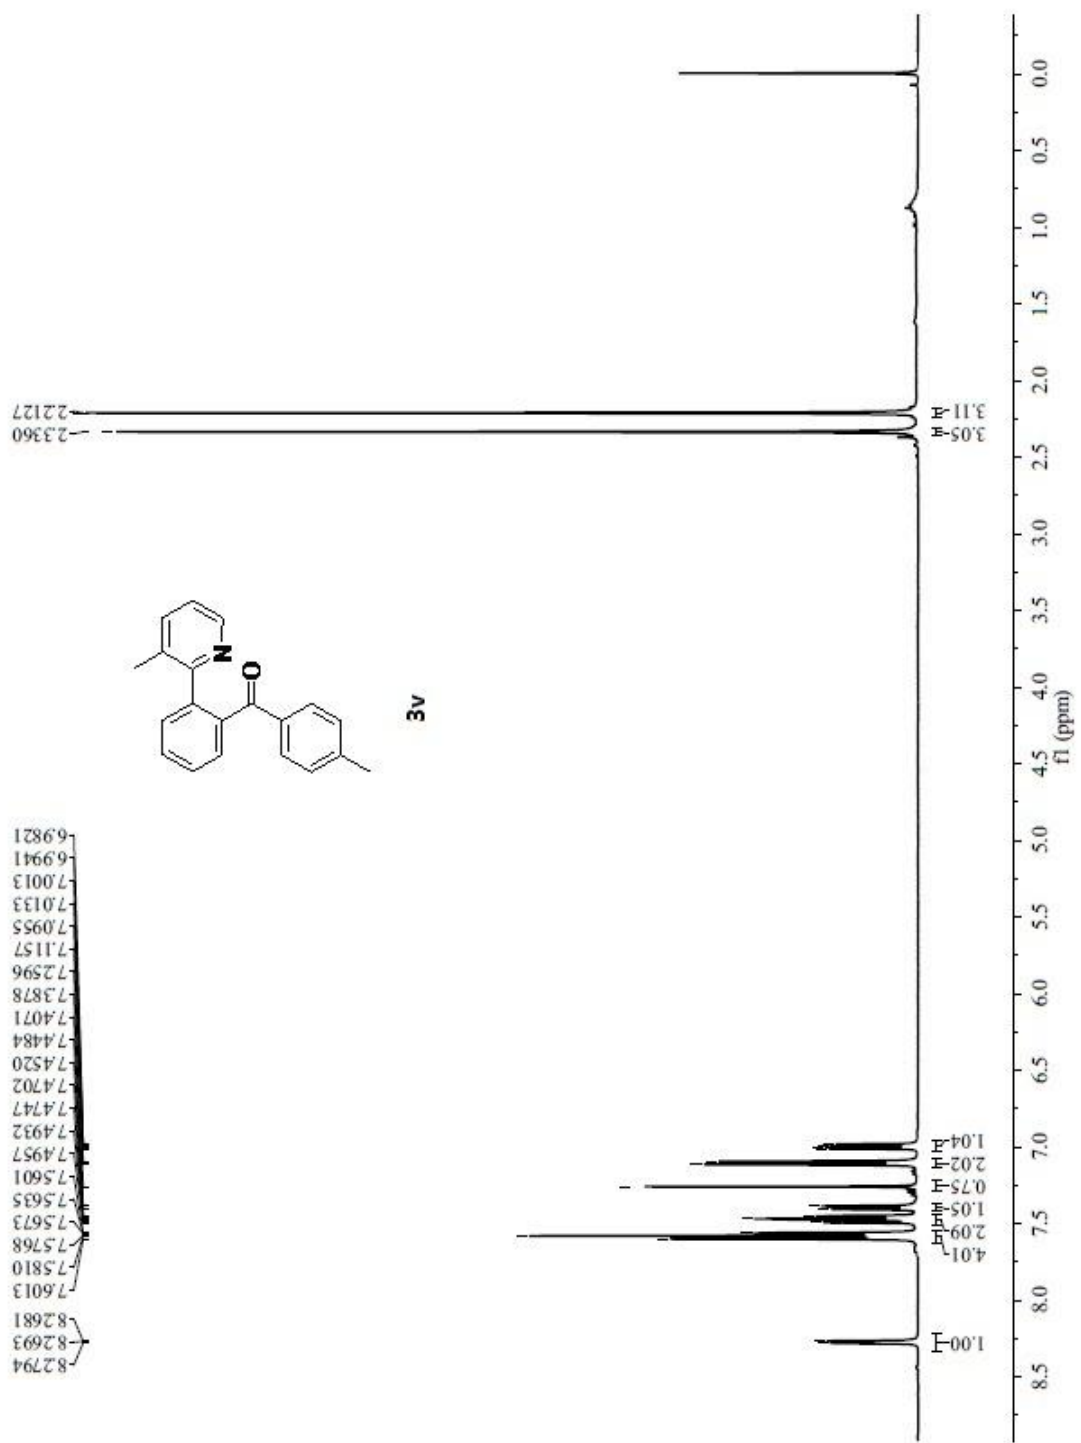

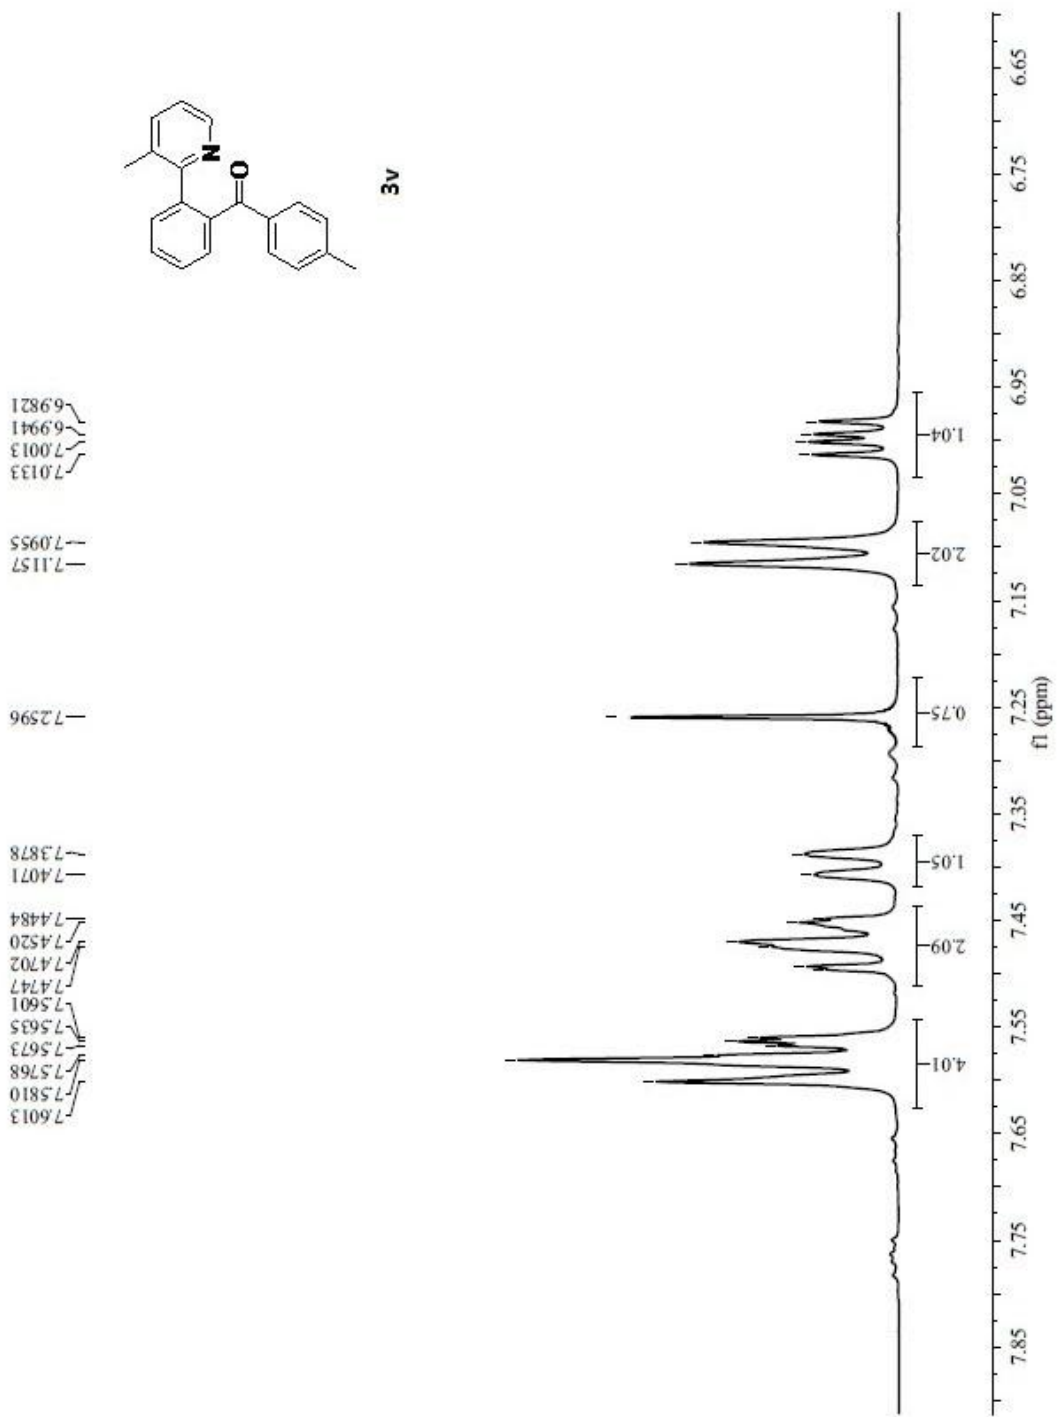

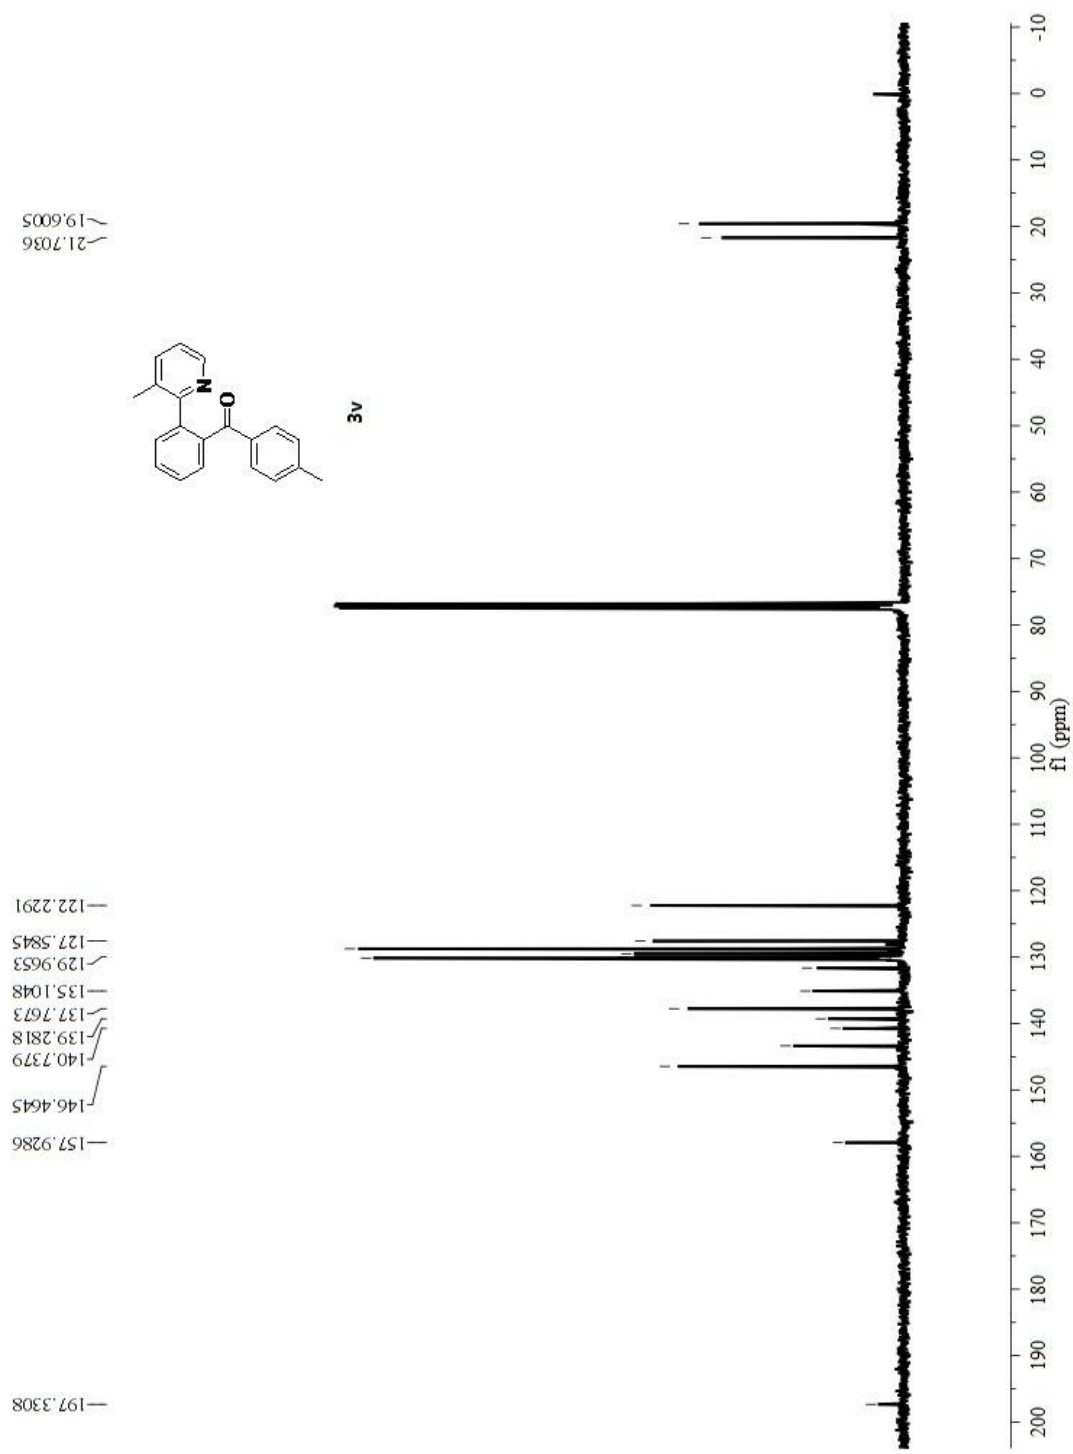



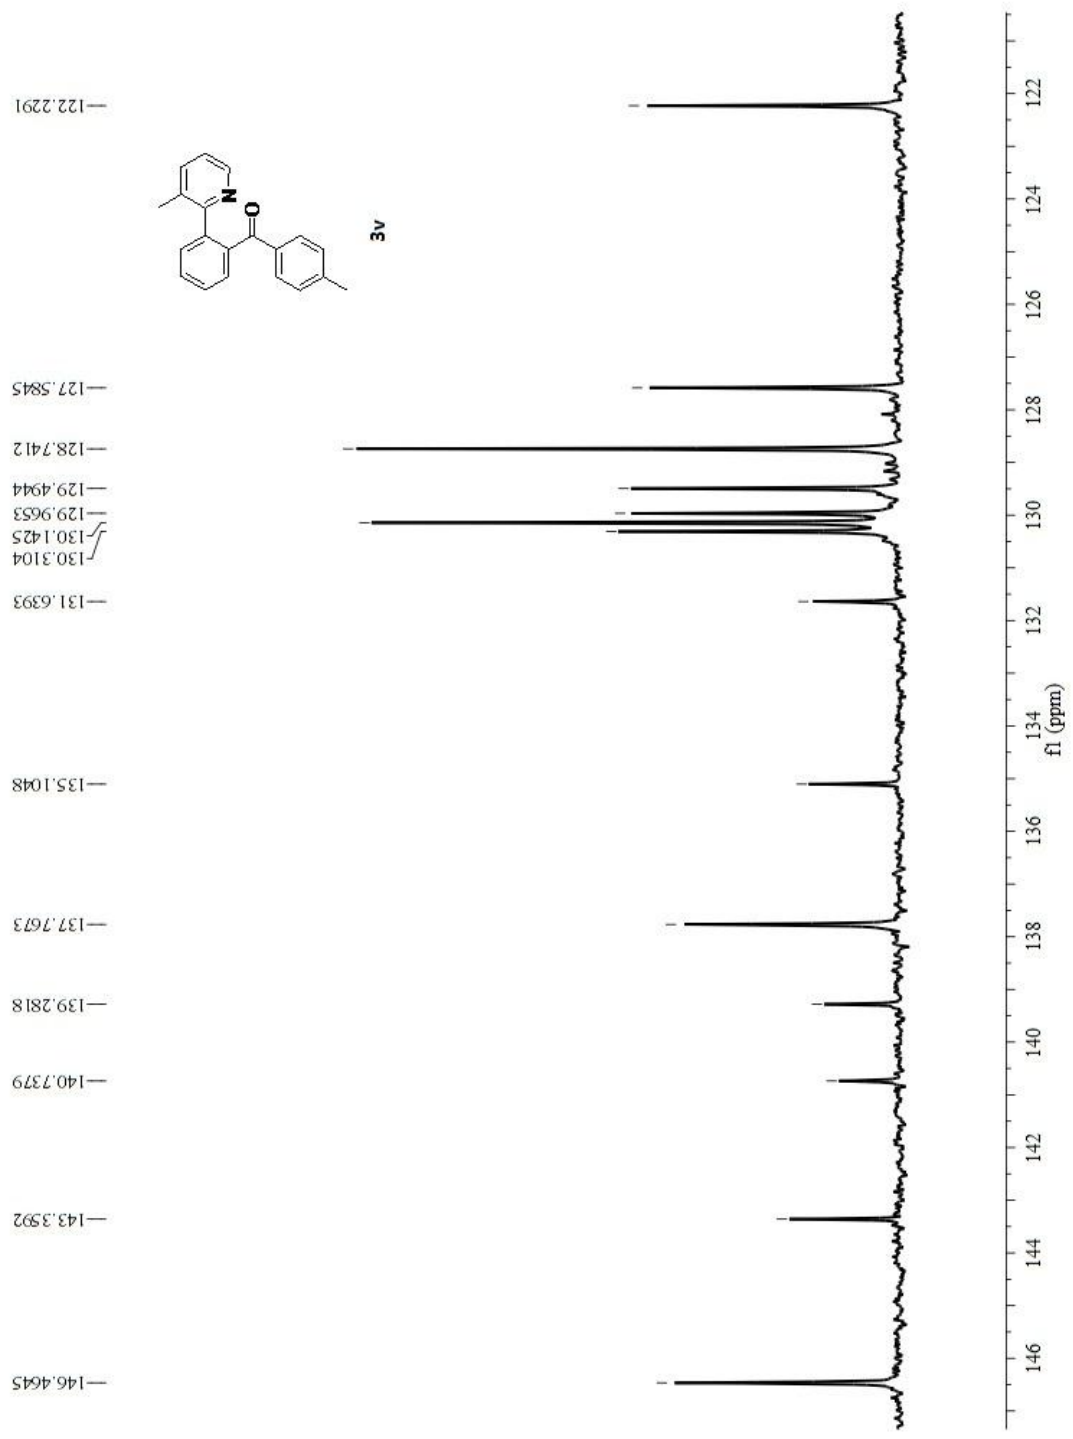

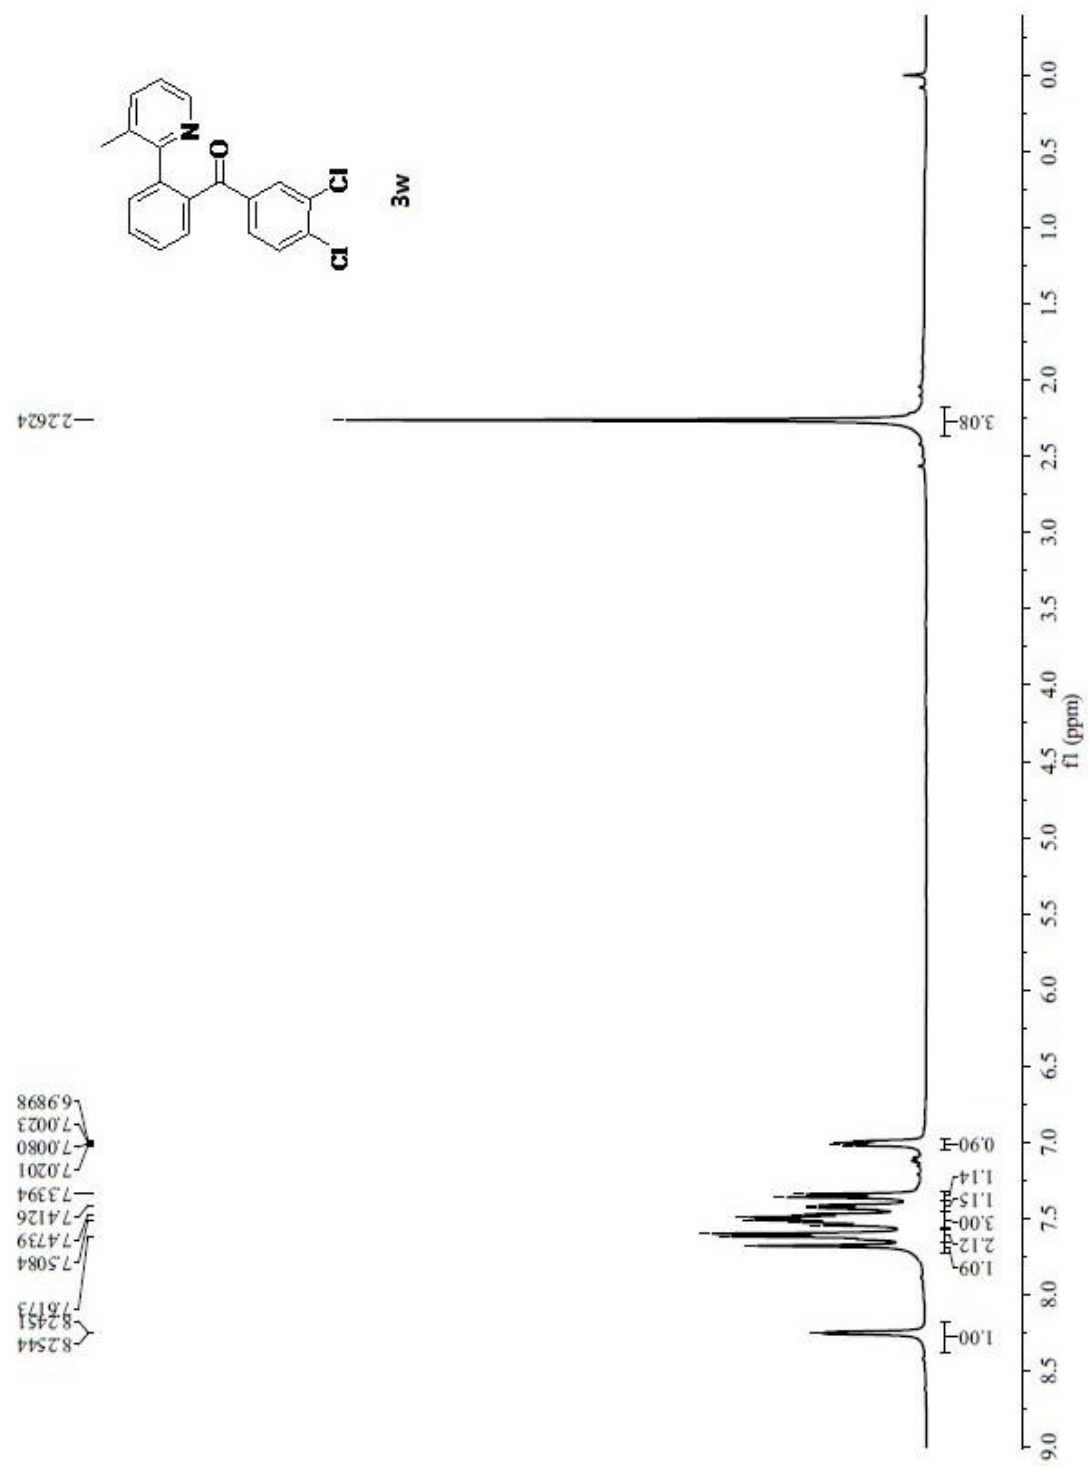

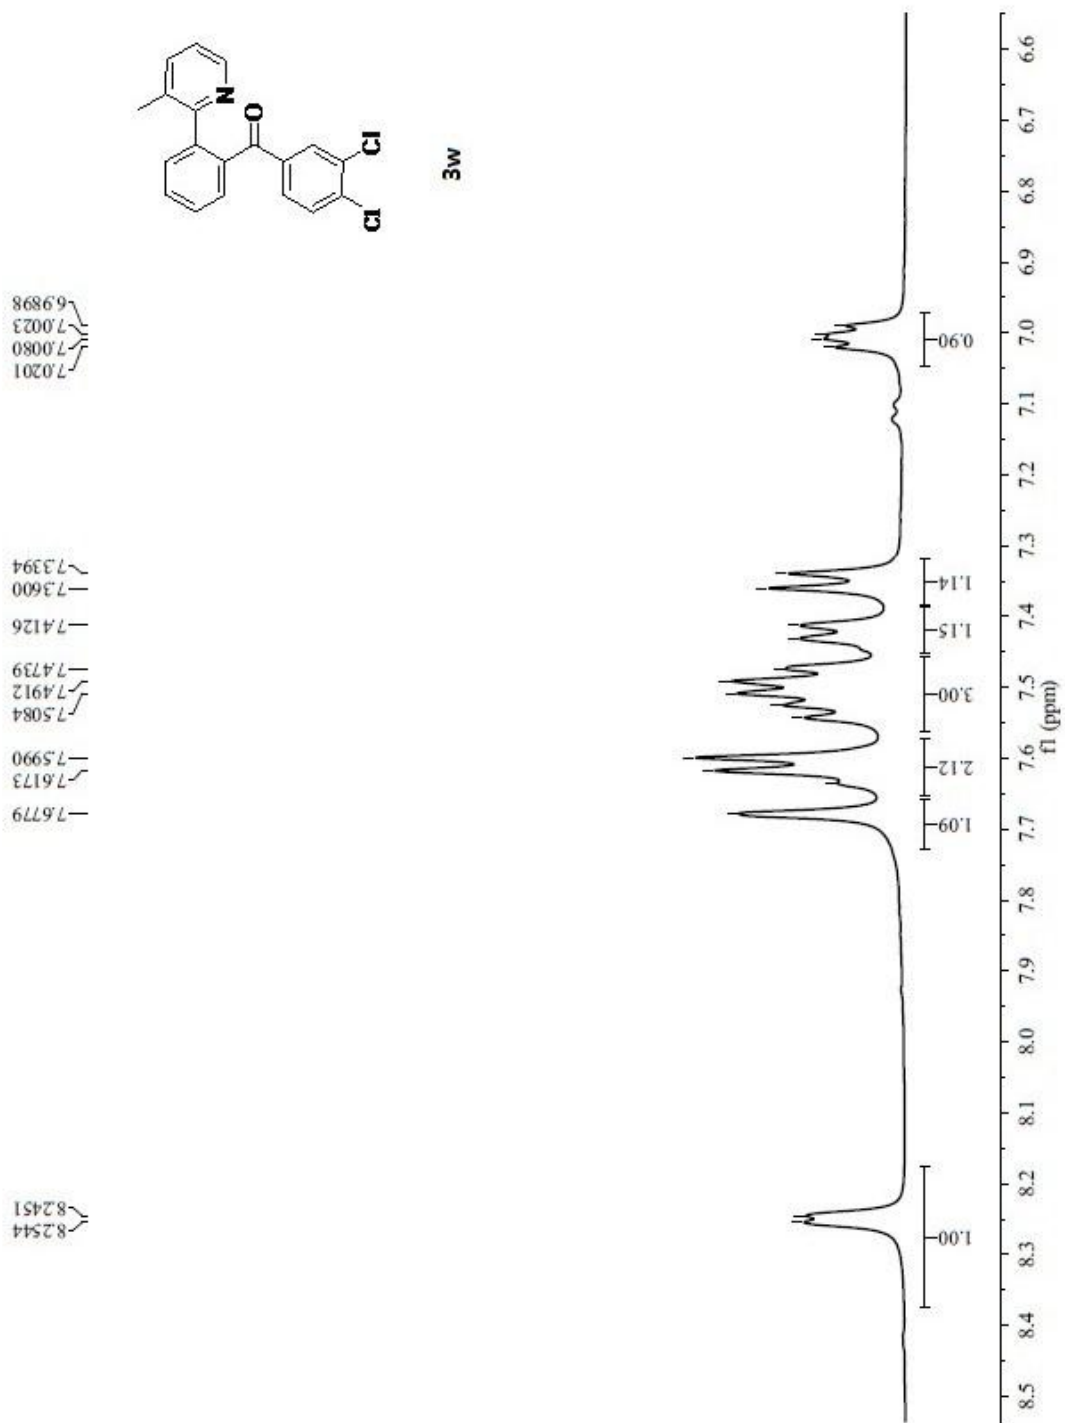

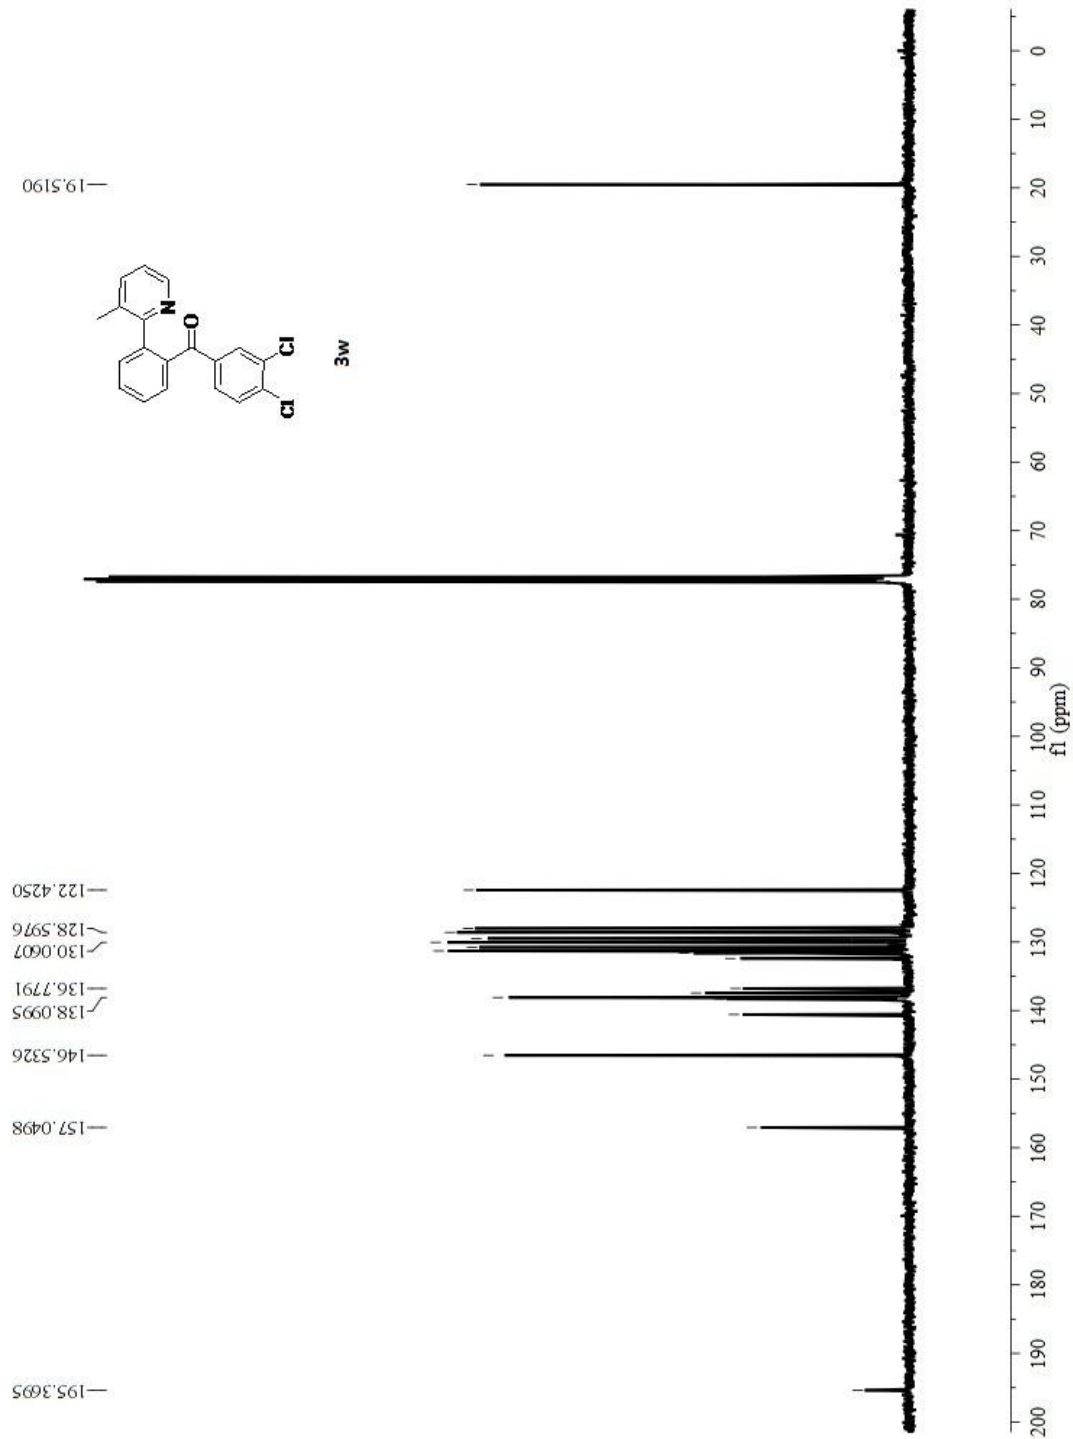

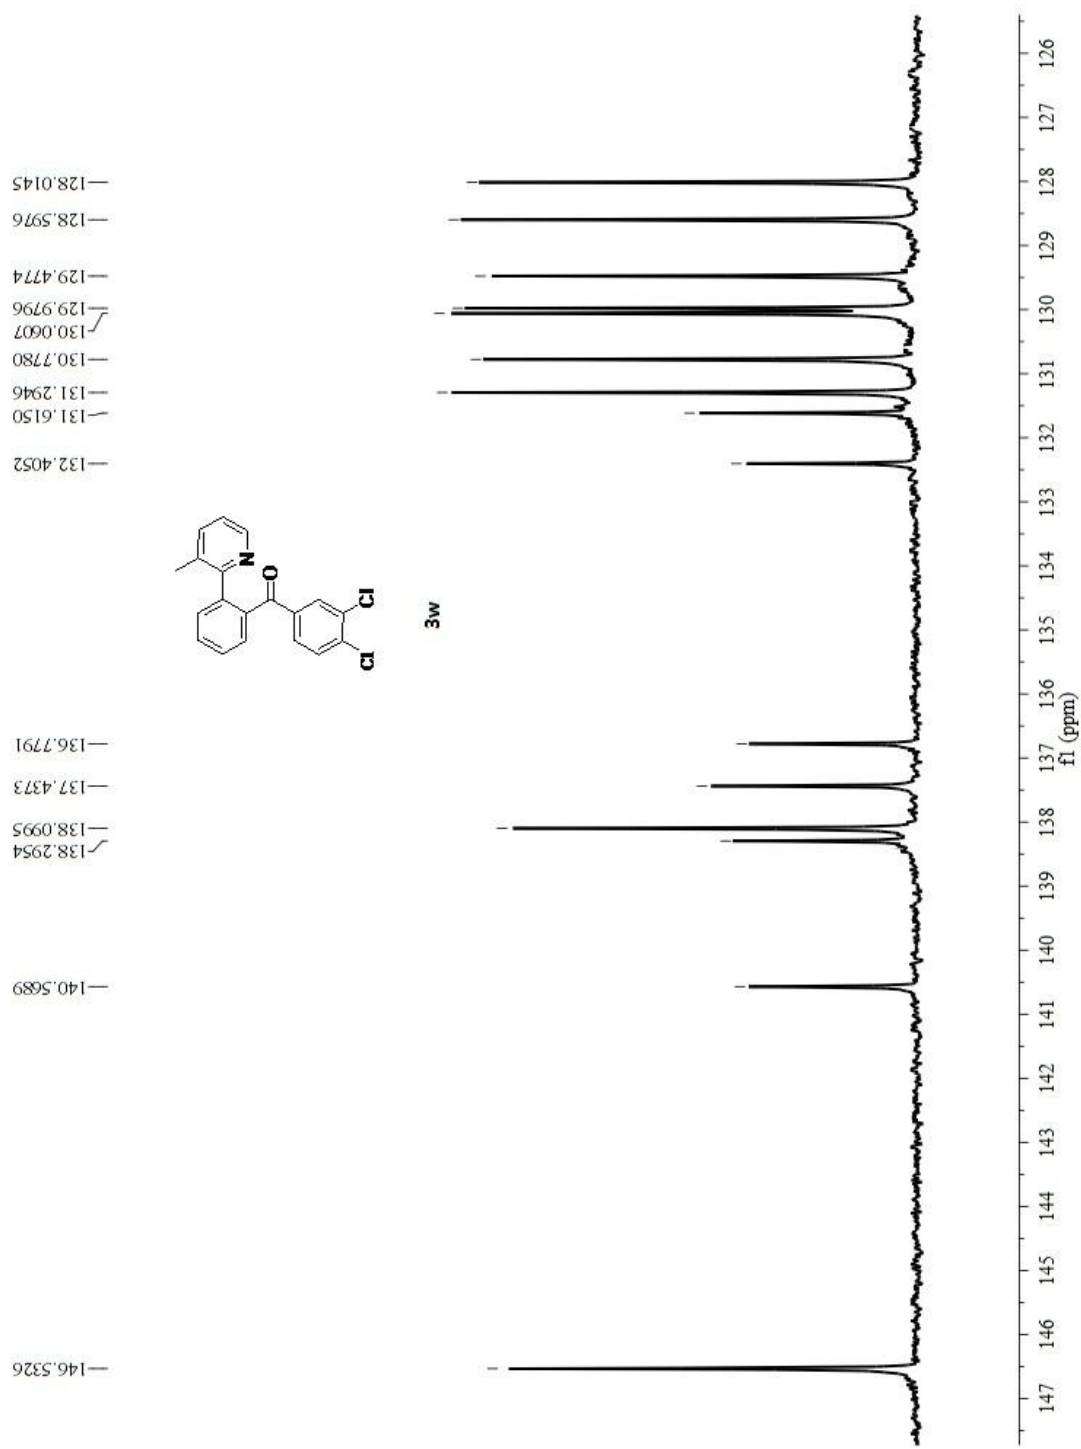

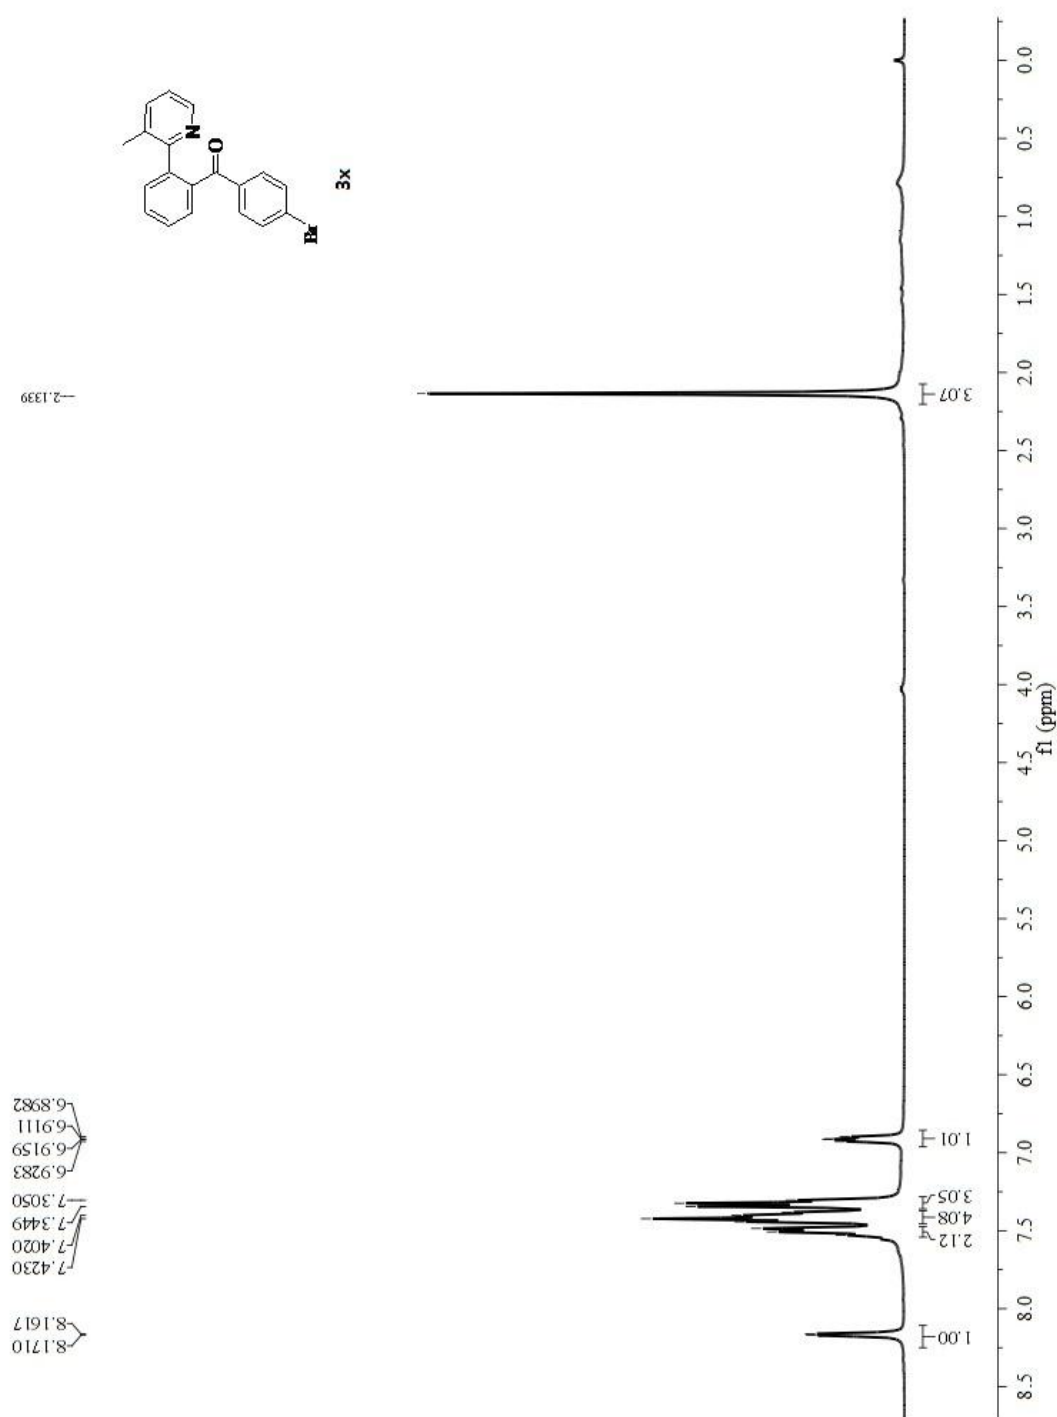

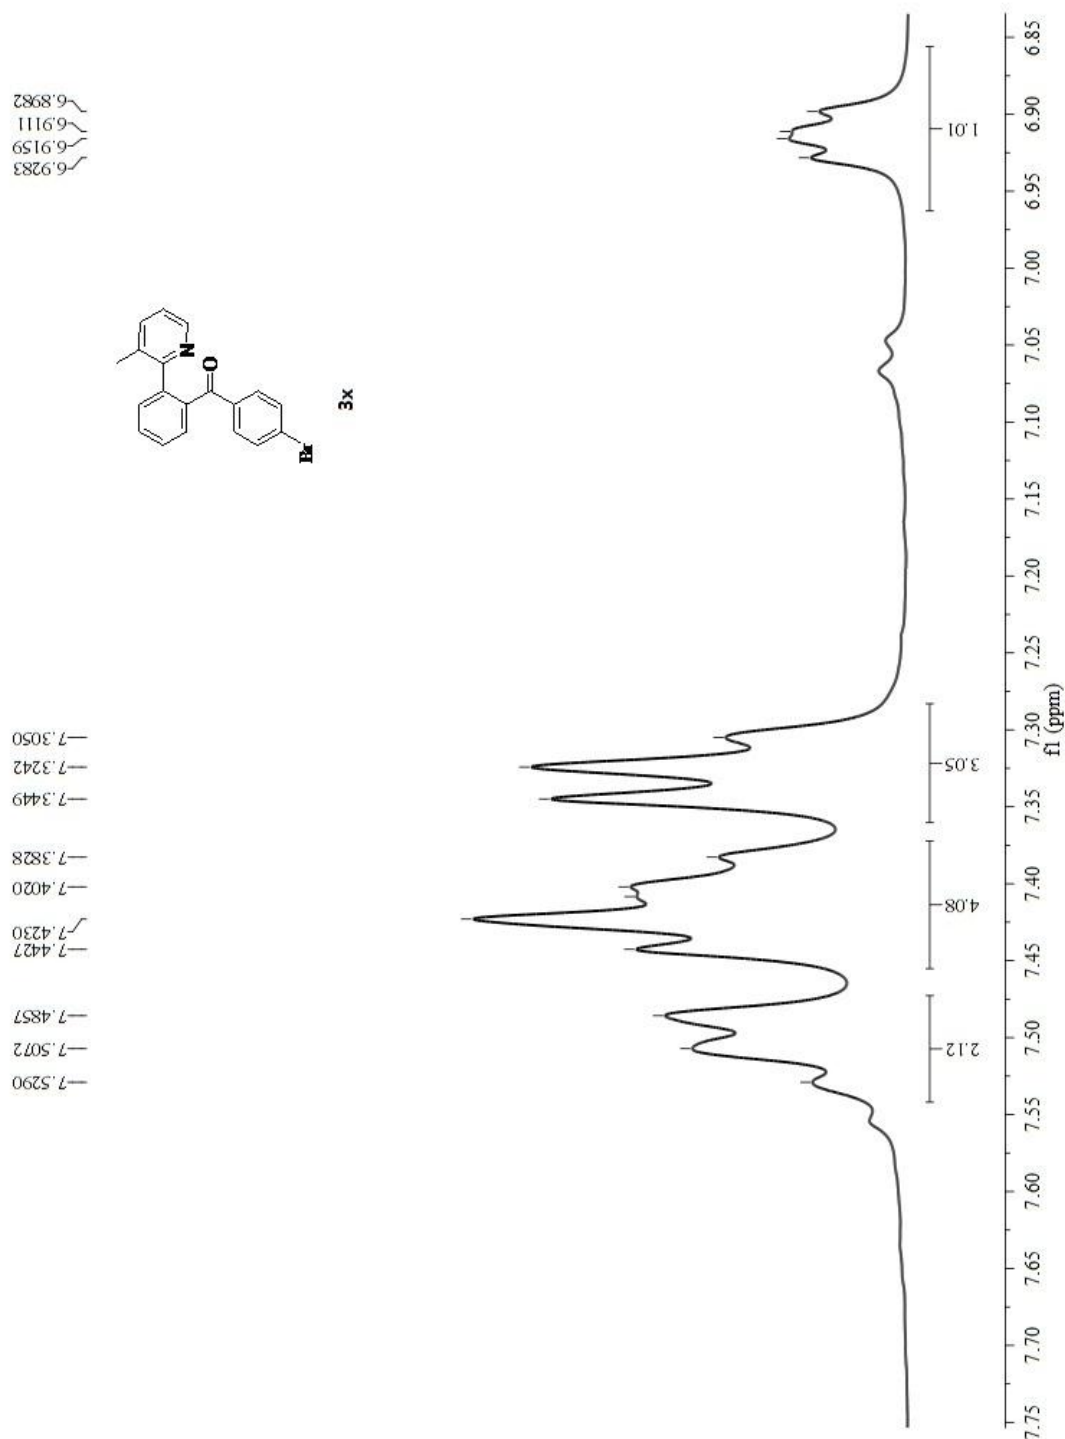

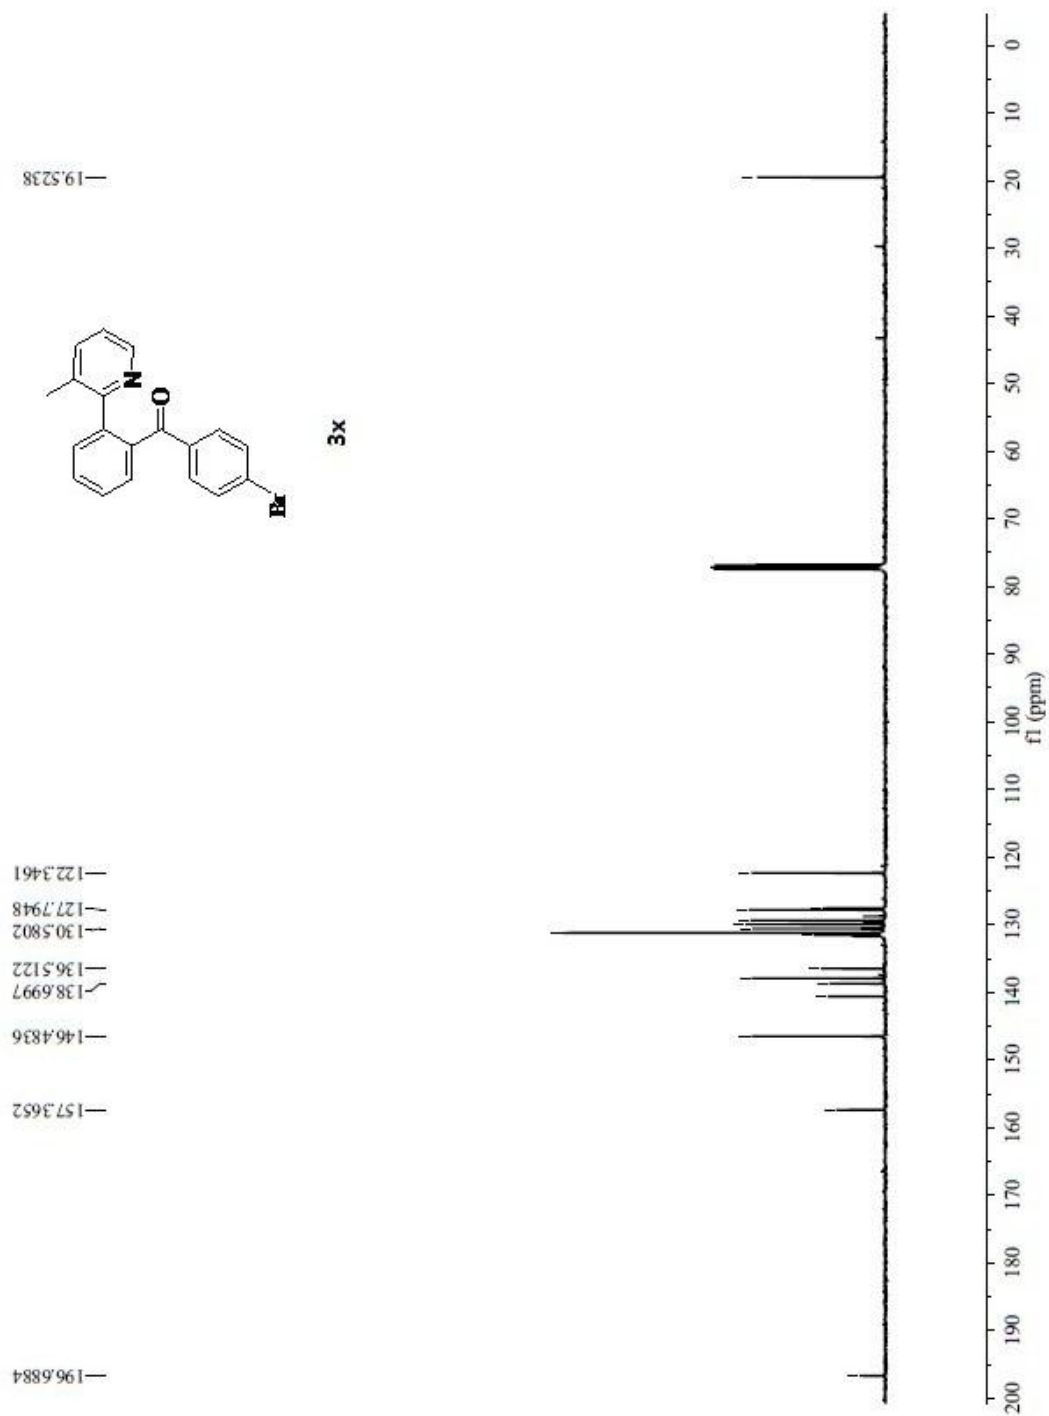



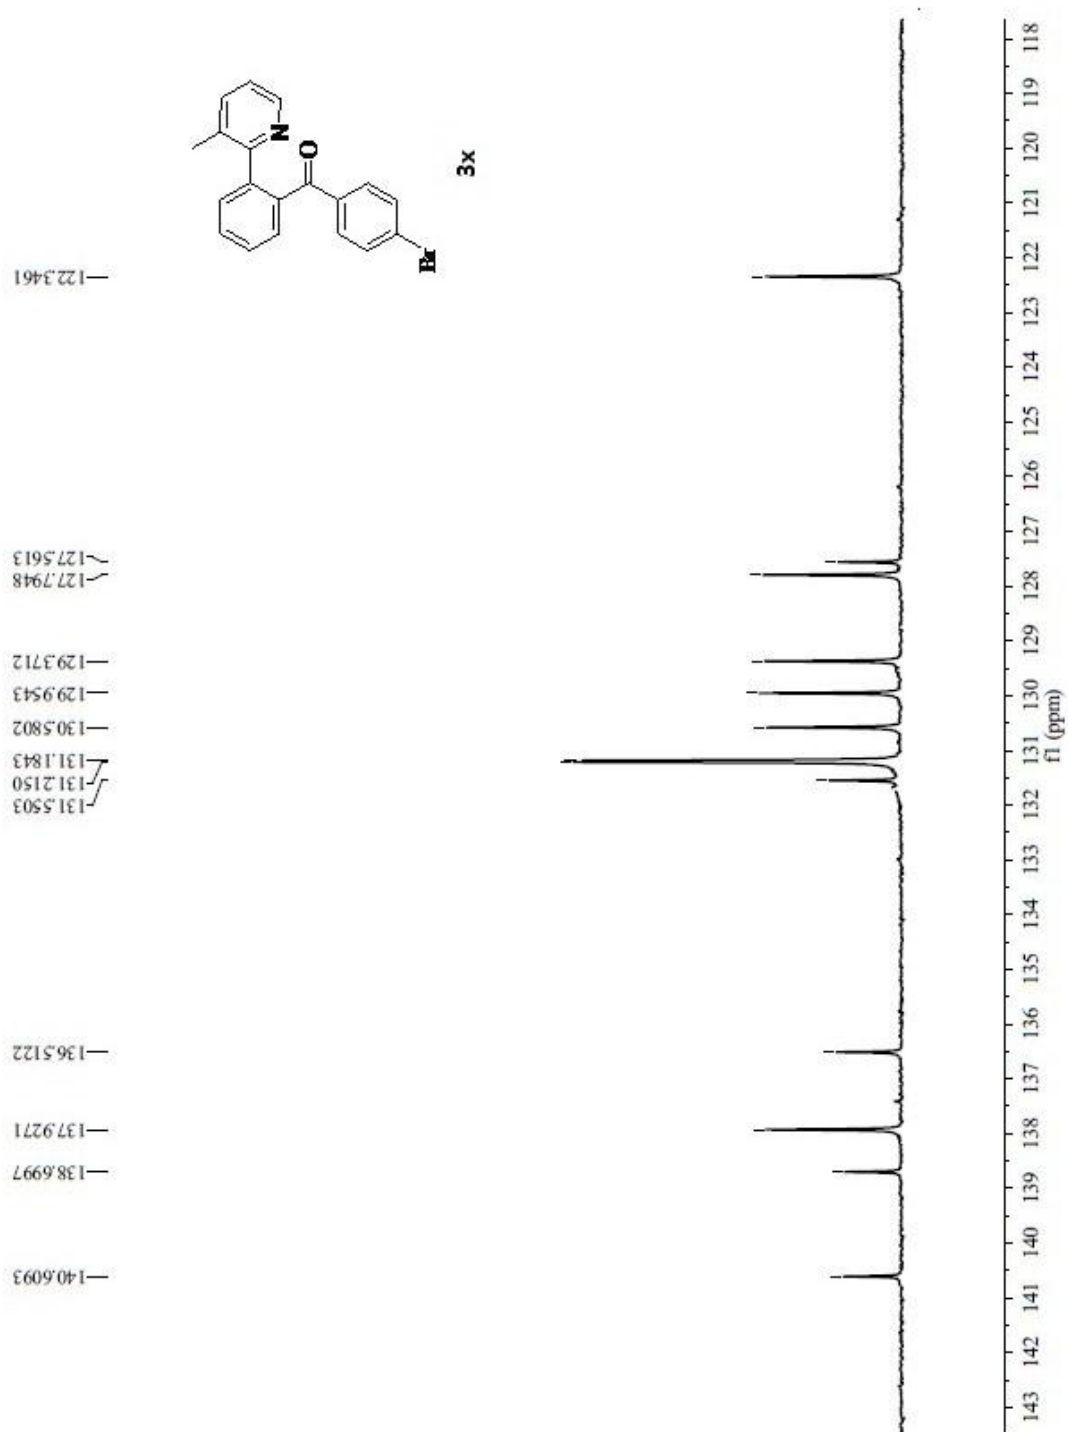

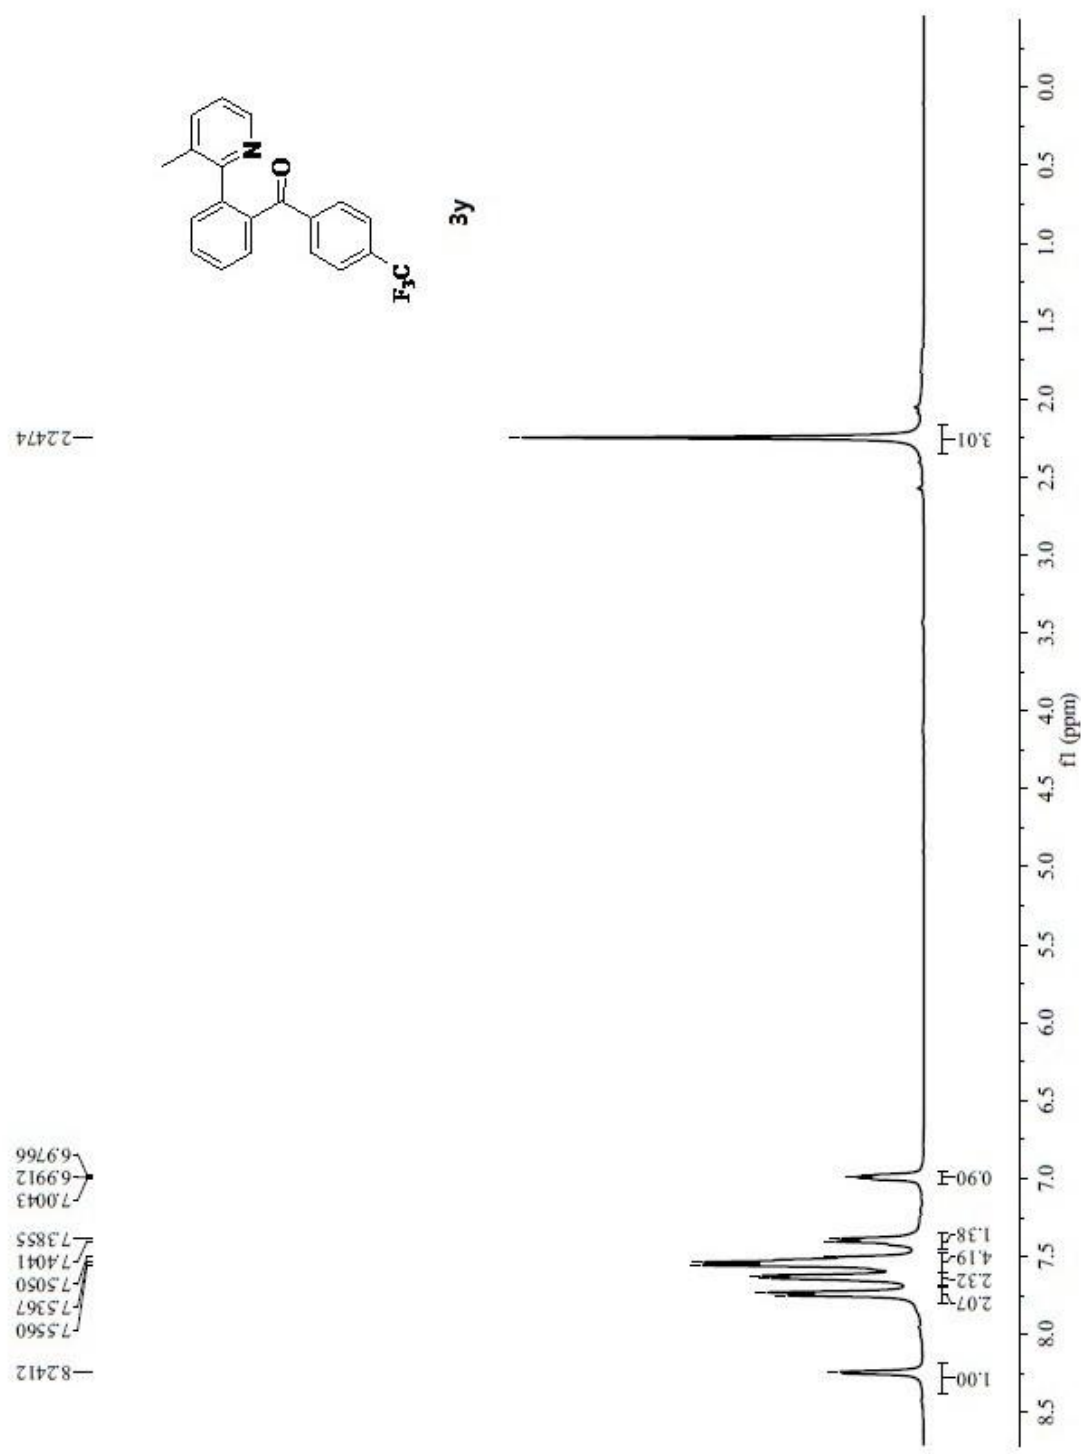

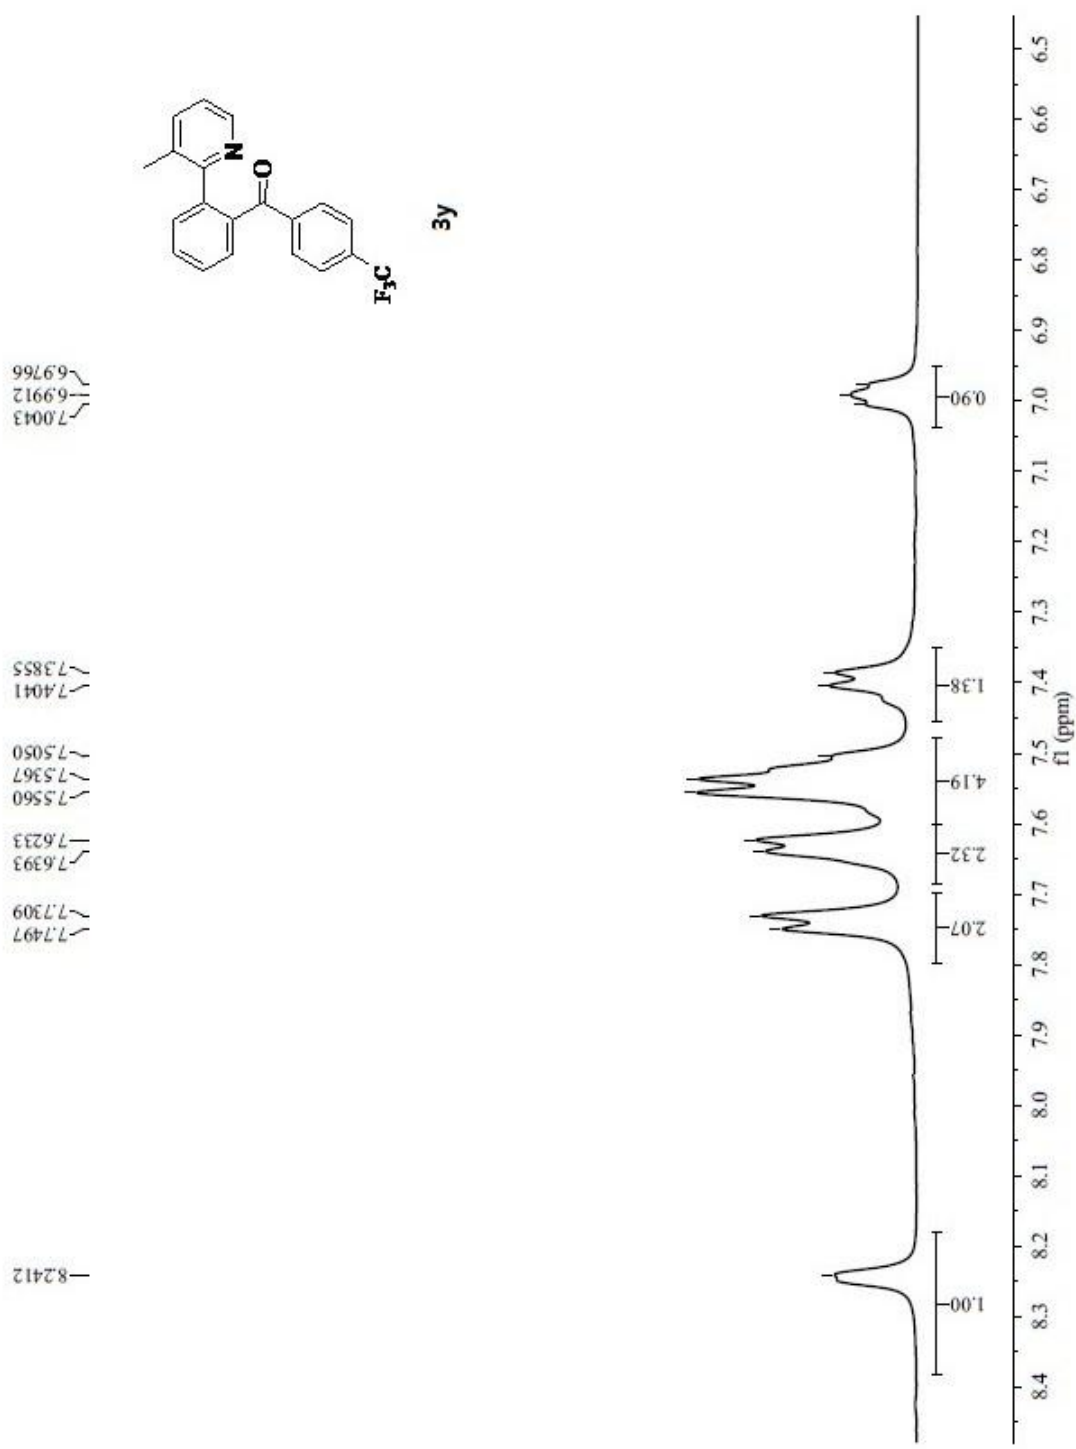

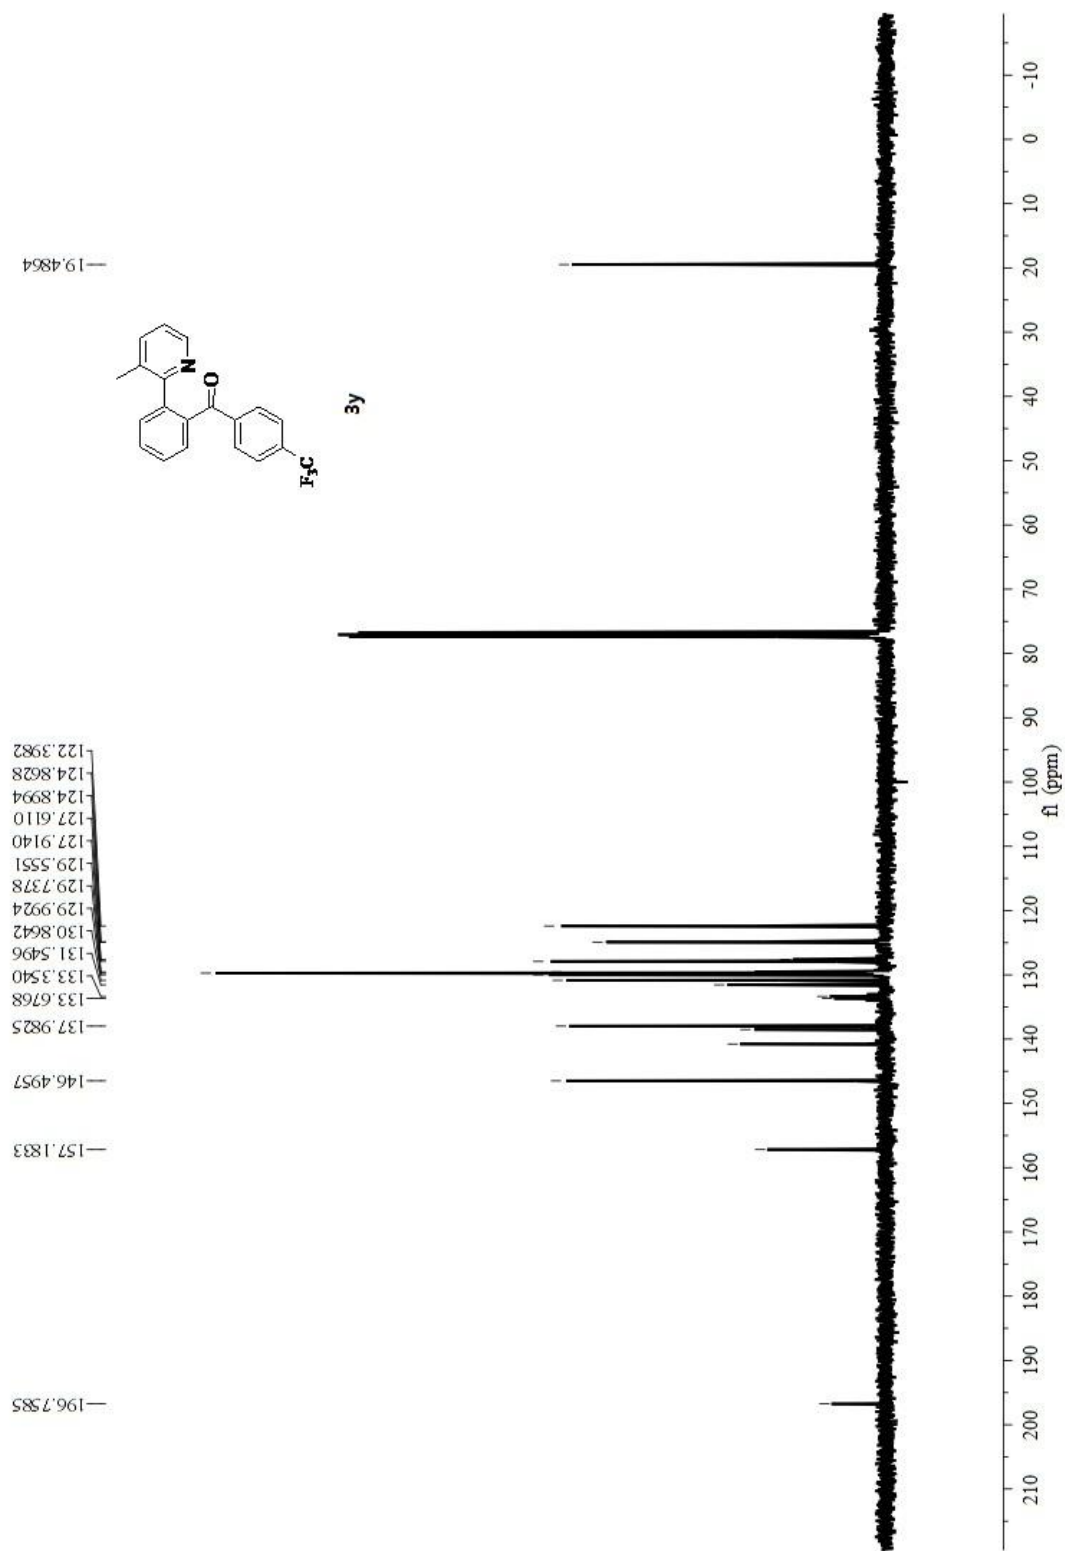

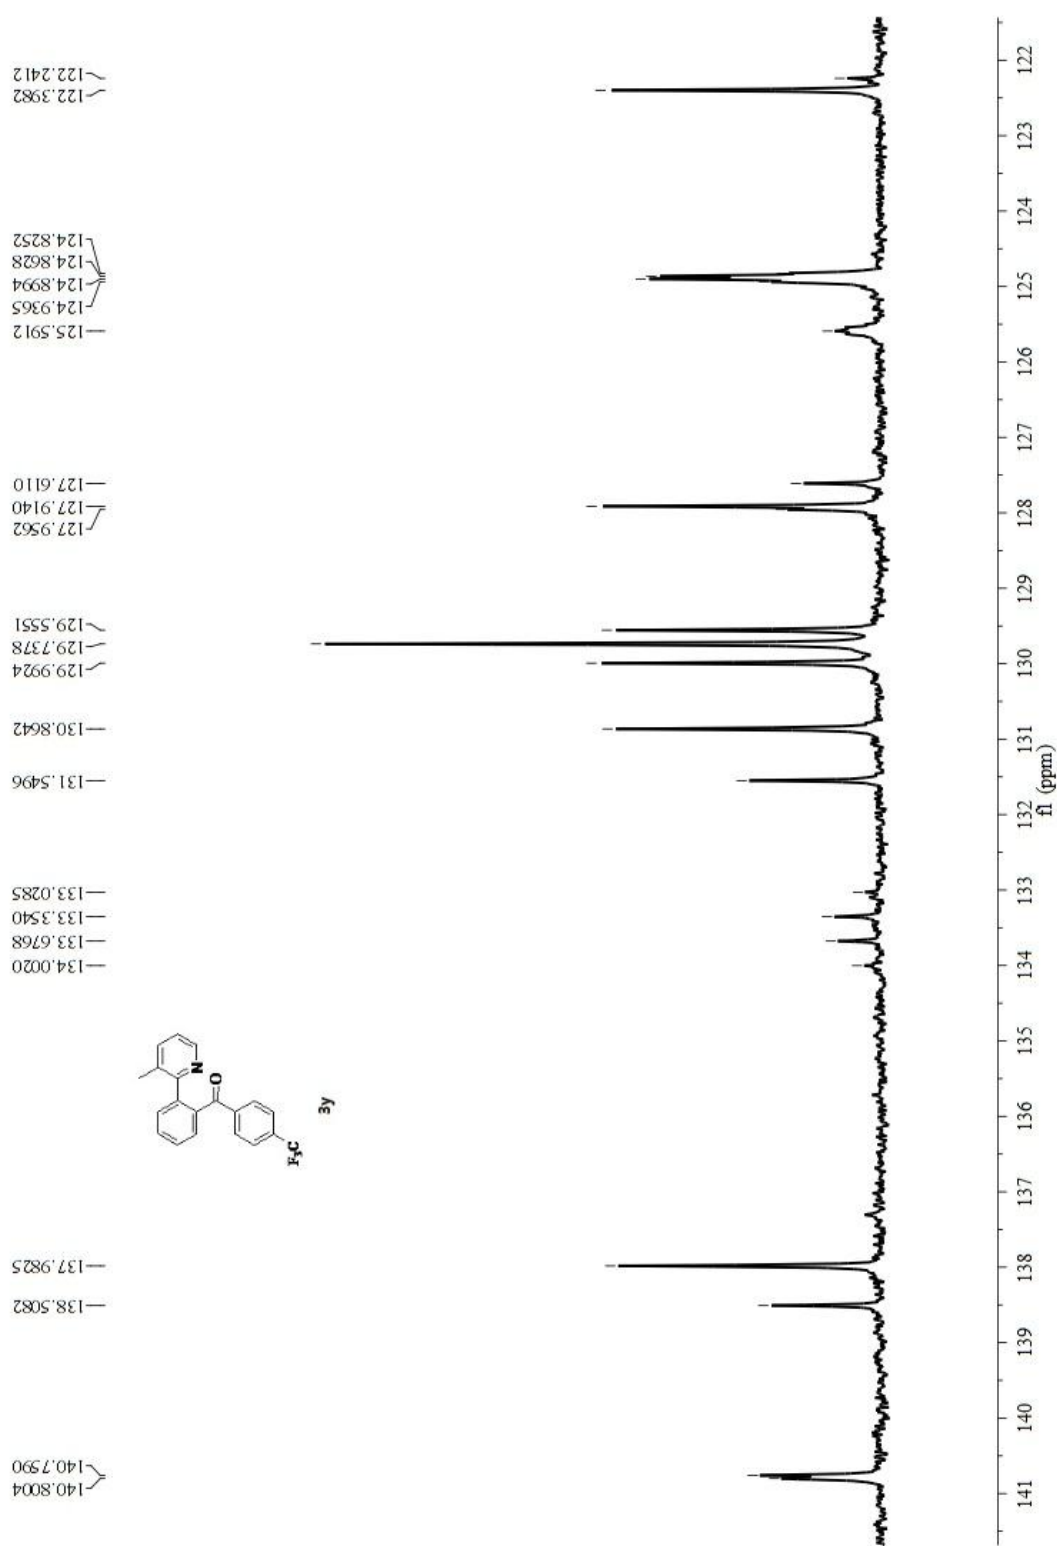

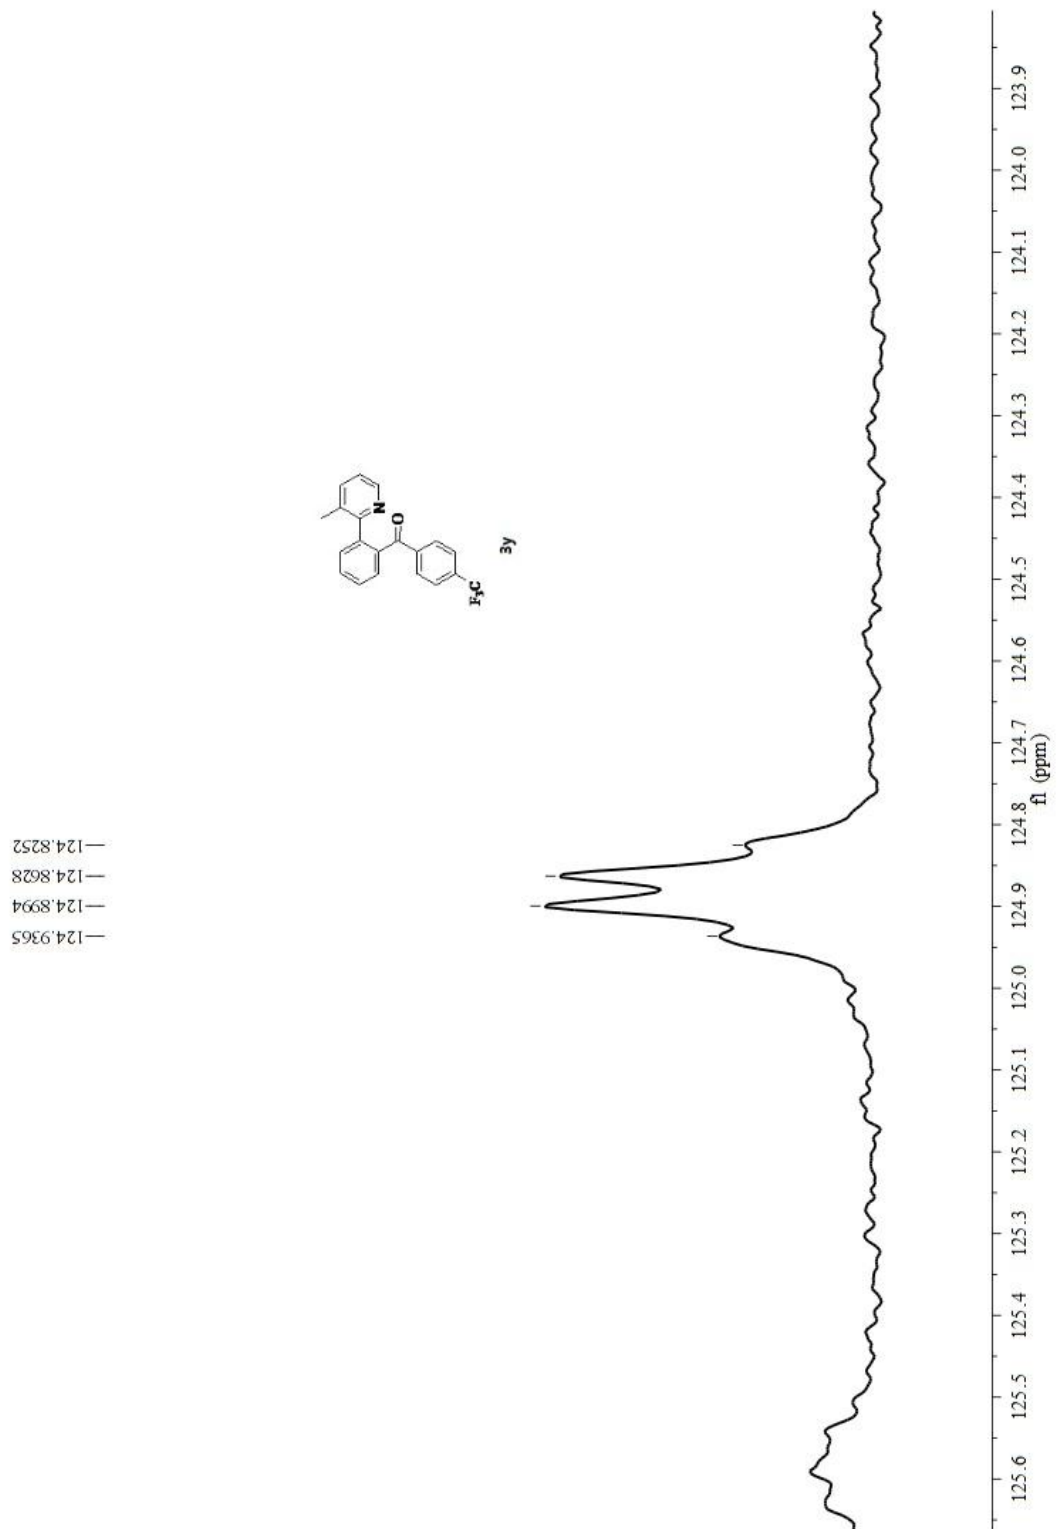

Supplement: c3cc42106f.pdf [file c3cc42106f.pdf]
